# Supplementary material for: Freestanding midwifery unit versus obstetric unit: a matched cohort study of outcomes in low-risk women
Source: PubMed Central journal article supplement — BMJ Open. 2011 Sep 30;1(2):e000262. doi: 10.1136/bmjopen-2011-000262 (PMC3191606; doi:10.1136/bmjopen-2011-000262), 2011-09-30
Supplement: bmjopen-2011-000262.draft_revisions.pdf [file bmjopen-2011-000262.draft_revisions.pdf]

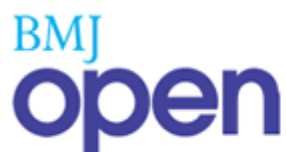

**Freestanding midwifery-led unit versus obstetric unit: A matched cohort study of outcomes in low-risk women**

|                                 |                                                                                                                                                                                                                                                                                                                                                                                                |
|---------------------------------|------------------------------------------------------------------------------------------------------------------------------------------------------------------------------------------------------------------------------------------------------------------------------------------------------------------------------------------------------------------------------------------------|
| Journal:                        | <i>BMJ Open</i>                                                                                                                                                                                                                                                                                                                                                                                |
| Manuscript ID:                  | bmjopen-2011-000262                                                                                                                                                                                                                                                                                                                                                                            |
| Article Type:                   | Research                                                                                                                                                                                                                                                                                                                                                                                       |
| Date Submitted by the Author:   | 19-Jul-2011                                                                                                                                                                                                                                                                                                                                                                                    |
| Complete List of Authors:       | overgaard, charlotte; Aalborg university, Department of sociology and social work<br>Møller, Anna; Aalborg University Hospital<br>Fenger-Grøn, Morten; Aarhus University Hospital, Department of Clinical Epidemiology<br>Knudsen, Lisbeth; Aalborg University, Department of Sociology and Social Work<br>Sandall, Jane; Division of Women's Health, School of Medicine, Kings College London |
| <b>Primary Subject Heading</b>: | Obstetrics & gynaecology                                                                                                                                                                                                                                                                                                                                                                       |
| Keywords:                       | Low risk childbirth, Birth interventions, perinatal and maternal morbidity, freestanding midwifery unit                                                                                                                                                                                                                                                                                        |
|                                 |                                                                                                                                                                                                                                                                                                                                                                                                |

SCHOLARONE™  
Manuscripts

Only

**Authors:**

Charlotte Overgaard, Anna Margrethe Møller, Morten Fenger-Grøn, Lisbeth B Knudsen, Jane Sandall

Aalborg University, Department of Sociology and Social Work, DK-9220 Aalborg, Charlotte Overgaard, research fellow

Aalborg University Hospital, Reberbansgade, DK-9100 Aalborg, Anna Margrethe Møller, Head of Obstetrics

Department of Clinical Epidemiology, Aarhus University Hospital, DK-8200 Aarhus N and Research Unit for General Practice, Aarhus University, DK-8000 Aarhus C, Morten Fenger-Grøn, medical statistician

Aalborg University, Department of Sociology and Social Work, DK-9220 Aalborg, Lisbeth B Knudsen, Professor of Medical Sociology and Socio-demography

Division of Women's Health, School of Medicine, Kings College London, St. Thomas' Hospital, Westminster Bridge Road, London SE1 7EH, Jane Sandall, Professor of Social Science and Women's Health

**Correspondence to:** C Overgaard, co@socsci.aau.dk.

**Manuscript word count:** 4.397 words, excluding abstract, figure legends, contributorship, acknowledgments, funding, competing interests, copyright/licence and references. **Tables:** 4,

**Figures:** 1. **Supplementary tables:** 4

**Objective:**

To compare perinatal and maternal morbidity and birth interventions in low-risk women giving birth in two freestanding midwifery units (FMUs) and two obstetric units (OUs).

**Design:**

A cohort study with a matched control group

**Setting:**

The region of North Jutland, Denmark

**Participants:**

839 low-risk women intending FMU birth and a matched control group of 839 low-risk women intending OU birth were included at the start of care in labour. OU women were individually chosen to match selected obstetric/socio-economic characteristics of FMU women. Analysis by intention-to-treat.

**Main outcome measures:**

Perinatal and maternal morbidity and interventions

**Results:**

No significant differences in perinatal morbidity were observed between groups (Ap-gar scores <7/5, <9/5 or <7/1, admittance to neonatal unit, asphyxia, or readmission). Adverse outcomes were rare, and occurred in both groups.

1  
2  
3  
4 FMU women were significantly less likely to experience abnormal fetal heart rate (RR: 0.3, 95%  
5  
6 CI: 0.2 to 0.5), fetal-pelvic complications (0.2, 0.05 to 0.6), shoulder dystocia (0.3, 0.1 to 0.9),  
7  
8 occipital-posterior presentation (0.5, 0.3 to 0.9), and postpartum haemorrhage >500ml (0.4, 0.3 to  
9  
10 0.6) compared to OU women.  
11  
12

13  
14  
15  
16 Significant reductions were found for FMU group's use of epidural analgesia (0.4, 0.3 to 0.6),  
17  
18 caesarean section (0.6, 0.3 to 0.9), instrumental delivery (0.4, 0.3 to 0.6), and oxytocin  
19  
20 augmentation (0.5, 0.3 to 0.6).  
21  
22

23  
24  
25  
26 Transfer during or <2 hours after birth occurred in 14.8% of all FMU births but much more  
27  
28 frequently in primiparas than in multiparas (36.7% versus 7.2%).  
29  
30

### 31 32 33 **Conclusion**

34  
35 Comparing FMU and OU groups, no increase was found in perinatal morbidity, but significantly  
36  
37 reduced incidences of maternal morbidity, birth interventions, and in-creased likelihood of  
38  
39 spontaneous vaginal birth. FMU care may be considered as an adequate alternative to OU care for  
40  
41 low-risk women. Pregnant prospective mothers should be given informed choice of place of birth,  
42  
43 including information on transfers.  
44  
45  
46  
47  
48  
49  
50  
51  
52  
53  
54  
55  
56  
57  
58  
59  
60

## Article Summary

### Article focus:

The safety of birth in free-standing midwifery-led units (FMUs) is strongly debated as acute complications may arise in a spite of careful risk assessment of women.

Studies of various observational design suggest that FMU care for low risk women is related to low perinatal and maternal morbidity, fewer interventions and a decreased use of medical pain relief compared to OU care but the level of evidence is weak and some studies is limited by e.g. the inclusion of high-risk women, low number of participants, and inadequate control of bias and confounding.

The aim of present study was to compare perinatal and maternal morbidity, birth interventions, and pain relief in low-risk women giving birth in two freestanding midwifery-led units (FMUs) and two obstetric units (OUs) in Denmark.

### Key messages:

No increase in perinatal morbidity was found among infants of low-risk women who intended birth in an FMU compared to infants of low-risk women who intended birth in an OU. More studies on rare adverse outcomes are needed.

The results of present study suggest that FMU care has important benefits such as reduced maternal morbidity, reduced use of birth interventions including caesarean sections and increased likelihood of spontaneous vaginal birth compared to OU care. However, more than one in three primiparas and one in fourteen multiparas is in need of transfer.

1  
2  
3  
4  
5  
6  
7  
8  
9  
10  
11  
12  
13  
14  
15  
16  
17  
18  
19  
20  
21  
22  
23  
24  
25  
26  
27  
28  
29  
30  
31  
32  
33  
34  
35  
36  
37  
38  
39  
40  
41  
42  
43  
44  
45  
46  
47  
48  
49  
50  
51  
52  
53  
54  
55  
56  
57  
58  
59  
60

Care in FMUs may be considered as an adequate alternative to OU care for low-risk women, and women should be given an informed choice of place of birth, including information on transfer.

#### Strengths and limitations of this study

A major study strength is that it compares processes and outcomes from women who have been prospectively judged to be at low obstetric risk in two well-defined and carefully established settings in the same region. Also the data are complete as all eligible women planning to give birth in the FMU settings were included, and full follow-up on all participants was obtained.

The primary study limitations stem partly from its observational design, partly from the sudden closure of the two FMUs. Although the study groups were very closely matched and adjustment for the matching factors revealed no residual confounding, the risk of confounding by unknown factors related to women's choice of care in labour persists. Neither can any bias linked to the delayed data collection for 289 FMU participants from 2004 be ruled out, but sub group analysis showed that 2004 data were in conformity with the later data.

## Freestanding midwifery-led unit versus obstetric unit:

### A matched cohort study of outcomes in low-risk women

#### Introduction

In most industrialised countries, obstetric units (OU) have become the primary setting for birth with the safety of other birth settings strongly debated<sup>1-5</sup>. The primary concern regarding birth outside an OU relates to the anticipation of adverse perinatal outcomes. But steadily increasing birth intervention rates and studies of women's perceptions of childbirth indicate that OUs may not always provide optimal conditions for low-risk childbirth or satisfy women's individual needs<sup>6-14</sup>. In many countries the introduction of midwifery-led units has given women a choice among places of birth<sup>1</sup>.

A Cochrane review concerning alongside midwifery-led units (AMU) found no significant differences in perinatal mortality or perinatal and maternal morbidity. In addition, it documented both significantly fewer medical interventions and increased maternal satisfaction<sup>12</sup>. However, this evidence cannot be generalised to freestanding midwifery-led units (FMU) and homebirths. Concern has been expressed that acute intrapartum and postpartum complications may arise in spite of careful assessment of low-risk women and that transfer delays may affect lifesaving medical interventions such as caesarean section or advanced neonatal resuscitation.

The two prospective, controlled cohort studies of FMUs<sup>16;17</sup> undertaken unanimously report low perinatal and maternal morbidity, fewer interventions and decreased use of medical pain relief. The results are supported by a wide range of retrospective, uncontrolled and/or population-based studies<sup>6;10;18-30</sup>. But the evidence is conflicting as two studies also found significantly lower 1-

---

<sup>1</sup> The terms used were adopted from Birthplace in England Research Programme (Study 1: terms and definitions)<sup>15</sup>

1  
2  
3  
4 (while not 5-) minute Apgar scores<sup>28</sup> and increased need for neonatal ventilation<sup>10</sup> in FMUs .

5  
6 Because of greatly varying criteria for low-risk categorisation, care standards, midwives' training,  
7  
8 cooperation between FMUs and OUs, etc., considerable caution must be observed when  
9  
10 generalising previous findings to other settings and countries. Furthermore, the level of evidence  
11  
12 was weak<sup>31</sup>. The applicability/validity of many studies is limited by factors such as restricted  
13  
14 participation, inclusion of high-risk women, limited control of bias and confounding, and  
15  
16 inadequate descriptions of inclusion and exclusion criteria, medical assistance (if any), and transfer  
17  
18 criteria.  
19  
20  
21  
22  
23

24  
25 The need for further research is substantial, but the rarity of adverse outcomes in a low-risk  
26  
27 population, the limited number of FMU births, and women's strong preference for choice of  
28  
29 birthplace<sup>32;33</sup> converge to form serious barriers for the investigation of perinatal mortality in large,  
30  
31 adequately powered, randomised controlled trials (RCTs). This increases the need for evidence  
32  
33 from carefully planned cohort studies.  
34  
35  
36  
37  
38

### 39 **Objectives**

40  
41 The present study compared labouring processes, perinatal and maternal morbidity and birth  
42  
43 interventions in low-risk women giving birth in FMUs and OUs in Denmark.  
44  
45  
46  
47  
48

49 The study is reported in accordance with STROBE requirements<sup>34;35</sup>.  
50  
51  
52  
53

### 54 **Study hypotheses**

55  
56 We hypothesised that the FMU care concept, with its emphasis on the physiological birth process  
57  
58 and socio-physical well-being during childbirth, would entail a number of positive effects for the  
59  
60



1  
2  
3  
4 women, such as a higher rate of spontaneous vaginal birth, intact perineum, and use of non-  
5  
6 pharmacological pain relief. FMU women were expected to experience fewer interventions  
7  
8 (including caesarean section) and require less use of pharmacological pain relief compared to OU  
9  
10 women. No differences in perinatal or maternal morbidity were predicted.  
11  
12  
13

## 16 **Methods**

### 18 **Design**

20 A matched cohort study  
21  
22  
23

### 25 **Setting**

26  
27 The study was conducted in North Jutland, a relatively sparsely populated region of Denmark where  
28  
29 the local health authorities in 2001 had decided to transform two of the region's four maternity units  
30  
31 into FMUs, opening in 2001 and 2004. The FMUs offered midwifery-led care during pregnancy and  
32  
33 intrapartum and postnatal periods to low-risk women.  
34  
35  
36  
37  
38  
39

### 40 **Data collection**

41  
42 In a 3.5-year period between 2004 and 2008, data on socio-demographic factors, previous  
43  
44 pregnancies and births, current pregnancy and birth, infants, FMU transfers, and maternal/neonatal  
45  
46 readmissions 0-28 days postpartum were collected from patient records and the North Jutland  
47  
48 Patient Administration System. The data collection was carried out by project staff with  
49  
50 comprehensive professional knowledge of the field on basis of written instructions.  
51  
52  
53  
54  
55

### 56 **Data security and ethics**

57  
58  
59  
60

1  
2  
3  
4 The project was approved by the Danish Data Protection Agency (reference number: 2005-41-5352)  
5  
6 and the regional health authorities of North Jutland. Data were handled in strict confidentiality and  
7  
8 in accordance with Danish law requiring neither approval from an ethics committee nor informed  
9  
10 consent from patients for observational studies involving no risk or inconvenience to patients<sup>36</sup>.  
11  
12  
13  
14  
15

### 16 **Characteristics of the freestanding maternity units**

17  
18 In Denmark care for low-risk women is midwifery-led in all birth settings. Midwives employed at  
19  
20 the FMUs were required to have at least two years of practice experience and adequate training in  
21  
22 obstetric emergencies, including ventouse delivery in case of acute second-stage fetal distress.  
23  
24

25  
26 Complications or indications hereof resulted in transferral of the women and/or the infants to the  
27  
28 nearest OU. Both FMUs were located in community hospitals with an intensive care unit but  
29  
30 without obstetric service. In case of emergencies, an anaesthesiologist/resuscitation-capable  
31  
32 specialist nurse was available. The annual number of FMU births were approximately 170 (Hobro)  
33  
34 and 130 (Frederikshavn).  
35  
36

37 **(Supplementary information: Table A: Characteristics of FMUs)**  
38  
39

### 40 41 **Characteristics of the obstetric maternity units**

42  
43 Aalborg University Hospital is a one of five highly specialised Danish hospitals with a specialist  
44  
45 OU who saw approximately 3500 births a year. Vendsyssel Hospital is a provincial hospital with 10  
46  
47 clinical specialities, including an OU providing care for low-risk and most high-risk pregnancies  
48  
49 and a generalised paediatric ward. The annual number of births was approximately 1400. Mothers  
50  
51 and infants with severe illness were transferred.  
52  
53  
54  
55

56 **(Supplementary information: Table B: Characteristics of OUs)**  
57  
58  
59  
60

### **Participants**

1  
2  
3  
4 The study population was composed of an intervention group of 839 low-risk women from two  
5 freestanding midwifery-led units in Hobro and Frederikshavn, and a control group of 839 low-risk  
6 women, matched for key factors, who received routine care from the specialist obstetric unit at  
7 Aalborg University Hospital and the obstetric unit at Vendsyssel Hospital, Hjørring.  
8  
9  
10  
11  
12

### 13 14 15 16 **Inclusion criteria**

17 All labouring women admitted to the FMUs by their midwives on the basis of multi-disciplinary,  
18 regional admission criteria were included in the study. As informed consent of participation was not  
19 required due to Danish legislation, all eligible women were included.  
20  
21  
22  
23  
24  
25  
26  
27

28 Women in the control group were eligible for inclusion only if they represented an individual match  
29 to the obstetric and social characteristics of a woman in the FMU group.  
30  
31  
32  
33  
34

35 Women in both study groups were thus rigorously judged to be at low-risk and fulfil criteria for  
36 FMU birth, and included at the start of care in labour.  
37  
38  
39  
40  
41

### 42 **Exclusion criteria**

43 Excluded for the study were only women admitted to an FMU for emergency treatment without  
44 satisfying the criteria for FMU care; an event occurring very rarely.  
45  
46  
47  
48  
49  
50  
51

### 52 **The matching process**

53 Confounding is a main concern in cohort studies. The matched design was chosen because it  
54 potentially increases the statistical precision in a cohort study and effectively eliminates the  
55 association between the exposure (place of birth) and the matching variables, given a perfect  
56  
57  
58  
59  
60

1  
2  
3  
4 balance of data is obtained on matched variables between groups<sup>34;37;38</sup>. Matching is especially  
5  
6 relevant in situations with non-linearity and inter-correlation between variables or where a  
7  
8 substantial difference in the distribution of confounders between groups is expected<sup>39</sup>. This was the  
9  
10 case in present study whose participants were recruited from areas characterised by varying degrees  
11  
12 of urbanisation and heterogeneity in socio-demographic characteristics<sup>40;41</sup>.  
13  
14  
15  
16  
17

18  
19 Women in the control group were selected from the region's patient administration system which  
20  
21 carries detailed information on the region's pregnant women. For each participant included in the  
22  
23 FMU group, a control participant from the nearest OU was identified among the admitted low-risk  
24  
25 women. The selection of matched control participants was conducted in accordance to strict  
26  
27 guidelines by project staff that were blinded to the identity and the birth outcomes of women in the  
28  
29 FMU group. The matching result was blinded until the selected control participants had given birth.  
30  
31  
32  
33  
34

35 Matching was done prospectively on criteria with an established influence on birth outcomes<sup>42-45</sup>:  
36  
37 low risk status, parity, smoking, BMI, age, ethnicity, education, occupation, and cohabitation status.  
38  
39 A 100% match was carried out on: low-risk status, parity and smoking status. Body Mass Index  
40  
41 (BMI) and age were matched with a range of +/-5; meaning that BMI/age scores of 22 were  
42  
43 matchable with scores between 17 and 27. Socio-demographic characteristics such as ethnicity,  
44  
45 education level, occupation, and cohabitation status were matched within groups as shown in Table  
46  
47  
48  
49 1.  
50  
51  
52  
53

#### 54 **Definition of low risk**

55  
56 Women were judged to be at low risk if they were healthy, presented in spontaneous labour  
57  
58 between 37+0 and 41+6 days of gestation, had an uncomplicated pregnancy and no  
59  
60

1  
2  
3  
4 medical/obstetric history or conditions increasing obstetric risk as outlined in the UK NICE  
5 intrapartum care guidelines<sup>46</sup>. However, we considered healthy multiparous women as low-risk  
6  
7 regardless of their age and BMI if their previous pregnancies and deliveries had been  
8  
9  
10  
11  
12 uncomplicated.

### 13 14 15 16 **Variables and data measurement**

17  
18 The primary outcome variables were the following: Apgar score <7/5 minutes, <9/5 minutes, and  
19  
20 <7/1 minutes; admittance to neonatal intensive care unit (NICU); admittance to NICU >48 hours;  
21  
22  
23 abnormal fetal heart rate leading to action; spontaneous vaginal birth; no perineal trauma;  
24  
25  
26 postpartum haemorrhage >500 ml; caesarean section; instrumental vaginal delivery; episiotomy;  
27  
28 epidural analgesia; and water immersion. Unfortunately, we were unable to obtain data on umbilical  
29  
30  
31 blood gas. Intended birthplace at the start of care in labour was considered the exposure.  
32  
33

34  
35 The data were recorded in accordance with the National Birth Register and the North Jutland Birth  
36  
37 Register, standards and guidelines applying to all four units and with which all midwives and  
38  
39 doctors in the region were familiar. A stop watch was used when measuring Apgar scores.  
40  
41  
42 Postpartum haemorrhage was routinely estimated rather than measured.  
43  
44  
45  
46

### 47 **Power calculation, sample size and changes in study protocol**

48  
49 Clinically important differences and power calculations were performed for all the above-  
50  
51 mentioned clinical endpoints /primary outcomes. The frequencies used in the calculations originate  
52  
53 in the North Jutland Birth Register and the international literature. Estimations of sample sizes were  
54  
55 based on power calculation for the two most important outcomes: Apgar score <7/5 minute and  
56  
57 caesarean section. The limited number of FMU births, at 300-350 per year, was also taken into  
58  
59  
60

1  
2  
3  
4 account. The study was originally planned to include data on 1027 FMU participants and 1027  
5  
6 control participants over a period of 3.5 years, starting 1st January 2005, however, in October 2006  
7  
8 the local authorities unexpectedly announced the imminent closure of its two FMUs. The decision  
9  
10 was based on criticism of the FMU concept by the National Board of Health. The power to detect  
11  
12 differences between our two study groups was consequently reduced and a thorough revision of the  
13  
14 study protocol was required. At the time of the FMU closures, 550 FMU participants had been  
15  
16 included, and in order to obtain the largest possible sample of FMU participants, we included all of  
17  
18 the 289 eligible women who had been admitted to the FMUs since the opening of the second FMU  
19  
20 (1 March 2004). These women were prospectively matched with women from the nearest OU, thus  
21  
22 ensuring total samples of 839 women in each group.  
23  
24  
25  
26  
27  
28  
29

30 This sample provided power (5% significance level, 80% power) to detect an increase in Apgar  
31  
32 score <7/5 minutes from expected 1.07% in the OU standard care group to 3.1% in the FMU group  
33  
34 and a reduction in the incidence rate of caesarean section from 8.8% in the OU group to 5.5% in the  
35  
36 FMU group . The study sustained the power to detect clinically relevant differences between groups  
37  
38 on all of the other primary outcomes as well.  
39  
40  
41  
42  
43

#### 44 **Statistical analysis of data**

45  
46 Analyses were based on the intention-to-treat principle and carried out by use of STATA software,  
47  
48 version 11.  
49  
50

51  
52 The two groups (matched 1:1) were compared by paired tests on all measures, McNemar's test for  
53  
54 paired binary data (medical data on the birth process) and Wilcoxon's signed-rank test for paired  
55  
56 continuous data (e.g. birth weight). As we were concerned that residual confounding might remain,  
57  
58 supplementary regression analysis adjusting for the matching characteristics was performed by use  
59  
60

1  
2  
3  
4 of both continuous and grouped variables<sup>47,48</sup>. For ease of interpretation (e.g. calculation of  
5  
6 confidence bands), ordinal outcomes were dichotomized, but we controlled for conclusive  
7  
8 agreement with test results based on the original data.  
9  
10

11  
12 The analysis for occipital posterior position was performed after excluding caesarean deliveries. For  
13  
14 all comparisons, relative risks with 95% confidence intervals were calculated. All reported P-values  
15  
16 were two-sided, and the level of statistical significance 5%. To check for bias introduced by the  
17  
18 inclusion of FMU women giving birth in 2004, supplementary sub-group analyses were performed  
19  
20 (2004-data versus main data).  
21  
22  
23

## 24 25 26 **Participants**

27  
28 A low-risk match was prospectively identified for all 839 women admitted to an FMU and full  
29  
30 follow-up was obtained for all 1678 women. Of the 839 FMU women, 733 (87.4%) gave birth as  
31  
32 planned in the FMU or at home, assisted by a FMU midwife (cf. Figure 1). Transit births were  
33  
34 included in the few cases where the woman had consulted a midwife <24 hours before giving birth  
35  
36 and had been advised to stay at home longer/return to her home.  
37  
38  
39  
40  
41

42  
43 Ninety-seven FMU women (11.6%) were transferred intrapartum, among these two gave birth in  
44  
45 the ambulance. Eleven, who were in early labour, were transported in their own vehicle. Twenty-  
46  
47 seven transfers (3.2%) took place <2 hours after birth, another thirteen (1.5%) during the postnatal  
48  
49 stay. The total number of transfers was 137 (16.4%).  
50  
51

## 52 53 **Figure 1: Flow chart**

54  
55  
56  
57 As shown in Table 1, the matching produced two fully comparable groups in terms of key medical  
58  
59 and socio-demographic factors. The FMU women's background details reflected the life conditions  
60

1  
2  
3  
4 of the local population in general<sup>40;49</sup>. With Aalborg and Hjørring municipalities as exceptions, the  
5  
6 educational and income levels in North Jutland rank as the lowest in Denmark. In the FMUs'  
7  
8 predominantly rural catchment areas, unemployment rates are high, which is reflected in a slightly  
9  
10 higher rate of FMU women without employment outside the home.  
11  
12

## 13 14 15 16 **Main results**

### 17 18 **Primary outcomes**

19  
20 Table 2 shows no statistically significant differences between the two study groups with regard to  
21  
22 perinatal morbidity as measured by: Apgar scores <7/5 minutes, <9/5 minutes, <7/1 minutes; the  
23  
24 total number of NICU admittances; NICU admittance >48 hours; neonatal asphyxia; and maternal  
25  
26 and neonatal readmission to hospital 0-28 days postpartum.  
27  
28

29  
30  
31  
32 The women in the FMU group were significantly less likely to experience abnormal fetal heart rate  
33  
34 leading to action (relative risk (RR): 0.3; 95% confidence interval (CI): 0.2 to 0.5); caesarean  
35  
36 section (0.6, 0.3 to 0.9); instrumental delivery (0.4, 0.3 to 0.6); 1-2<sup>nd</sup> degree tearing (0.9, 0.8 to  
37  
38 0.97); postpartum haemorrhage >500ml (0.4, 0.3 to 0.7), or to have epidural analgesia (0.4, 0.3 to  
39  
40 0.6), and pudendal nerve block (0.1, 0.0 to 0.5) for pain relief compared to women in the OU group.  
41  
42 Moreover, the FMU women were significantly more likely to experience spontaneous vaginal birth  
43  
44 (1.06, 1.03 to 1.09), intact perineum (1.1, 1.02 to 1.2) and water immersion for pain relief (1.4, 1.2  
45  
46 to 1.6) than were the OU women.  
47  
48  
49

### 50 51 **Table 2: Primary outcomes**

### 52 53 54 55 56 **Secondary outcomes**

57  
58 No significant differences between groups were found for: infant birth weight (mean: 3.636 kg  
59  
60 (FMU) and 3.641 kg (OU), the occurrence of meconium-stained amniotic fluid, the use of



1  
2  
3  
4 uterotonics, and non-recumbent positions for birth, postpartum haemorrhage >1000 ml, 3<sup>rd</sup>/4<sup>th</sup>  
5  
6 degree tears, cervical dilatation on admission (mean: 4.4 cm (FMU) and 4.3 cm (OU)), or duration  
7  
8 of admission for labour care (mean: 5.3 hours (FMU) and 5.6 hours (OU)) .  
9  
10

11  
12  
13  
14 As shown in table 3, the FMU women were significantly less likely to experience: dystocia (0.4, 0.3  
15  
16 to 0.5); intrapartum fetal-pelvic complications (0.2, 0.05 to 0.6); shoulder dystocia (0.3, 0.1 to 0.9);  
17  
18 and occipital posterior presentation (0.5, 0.3 to 0.9) compared to OU women. The same applied for  
19  
20 oxytocin augmentation (0.5, 0.3 to 0.6), treatment for shoulder dystocia (0.1, 0.01 to 0.8), perineal  
21  
22 suturing (0.8, 0.7 to 0.9), and intrauterine palpation (0.3, 0.1 to 0.9).  
23  
24

### 25 26 **Table 3: Secondary outcomes**

#### 27 28 29 30 **Other analyses**

31  
32  
33 A regression analysis adjusting for the matching characteristics showed coinciding results with the  
34  
35 match analysis, thus confirming the robustness of our results and matching. A sub-group analysis  
36  
37 comparing the late collected data on 2004-FMU participants with the main, prospectively collected  
38  
39 data detected no systematic differences or deviation of results between the two bodies of data.  
40  
41  
42

#### 43 44 **Transfer**

45  
46  
47 For the 97 FMU women transferred to an OU during labour, the most common reasons were: failure  
48  
49 to progress in labour (56%), meconium-stained amniotic fluid (14.2%), and abnormal fetal heart  
50  
51 rate (10.2%). The risk of transfer during or <2 hours after birth was very different for primiparous  
52  
53 and multiparous women (36.7% versus 7.2%). All reasons for transfer are tabulated in Table 4.  
54  
55

56  
57 Ambulance transfers from the two FMUs averaged 42/38 minutes (range: 20 to 60). Further  
58  
59 information on transfers is under preparation for publication elsewhere.  
60

1  
2  
3  
4  
5  
6  
7 After transfer, women had shared care between an obstetrician and a midwife (either an OU  
8 midwife or a FMU midwife accompanying them to the OU (in 36% of transfers)).  
9  
10

#### 11 12 13 **Table 4: Causes of FMU-OU transfers** 14 15 16

17 **Adverse outcomes** were defined as severe maternal morbidity, perinatal mortality, Apgar score  
18 <7/5 minutes, and >1 week NICU admittance. One incident of severe maternal morbidity (uterine  
19 rupture) occurred among the OU women. In the FMU group, one perinatal/neonatal death occurred  
20 due to an undetected, severe congenital malformation. Nine infants were born with 5 minute Apgar  
21 scores of 4-6; three belonged to the FMU group but were born in an OU following intrapartum  
22 transferral. Eight of the nine infants were admitted to NICU; all were later discharged well.  
23  
24  
25  
26  
27  
28  
29  
30  
31  
32  
33

34 Three infants from the FMU group, who were born in an OU after transfer, had NICU stays  
35 exceeding one week. One infant with a 5/5 Apgar score had a stay of 36 days, but this was due  
36 primarily to an undetected congenital heart disease.  
37  
38  
39  
40  
41  
42

43 One adverse perinatal event was dealt with in a FMU shortly after its opening. Due to an umbilical  
44 cord prolapse, emergency caesarean section was carried out by a gynaecologist, employed at the  
45 unit before its transformation into a FMU and summoned against protocol. Apgar scores were 10/1,  
46  
47  
48  
49  
50  
51 **10/5. (Supplementary information on all adverse events is provided in Table C).**  
52  
53  
54

## 55 **Discussion**

### 56 57 **Key results** 58 59 60

1  
2  
3  
4 This study aimed to compare maternal and infant outcomes for women at low risk who intended to  
5 give birth in FMU or OU settings. We found no significant differences in perinatal morbidity  
6  
7 measured by Apgar scores <7/5 minutes, <9/5 minutes, <7/1 minutes; the total number of NICU  
8  
9 admittances; neonatal admittance to NICU >48 hours; neonatal asphyxia; or neonatal readmission  
10  
11 to hospital.  
12  
13  
14

15  
16  
17  
18 Moreover, among this population of low-risk women, dystocia, intrapartum fetal-pelvic  
19  
20 complications, occipital-posterior position of the infant, shoulder dystocia, oxytocin augmentation,  
21  
22 instrumental delivery, caesarean section, and post-partum haemorrhage >500 ml occurred  
23  
24 significantly less often in the FMU group compared to the OU group. A comparison of the groups  
25  
26 thus showed the FMU women to have a significantly greater likelihood of spontaneous vaginal birth  
27  
28 and intact perineum.  
29  
30  
31  
32  
33

### 34 35 **Limitations**

36  
37 The limitations of our study stem partly from its observational design, partly from the sudden  
38  
39 closure of the two FMUs. A non-randomised study design precludes elimination of all potential  
40  
41 confounding factors; only known confounders can be adjusted for, and only as far as they can be  
42  
43 accurately measured. Despite of our close matching of study groups and adjustment for matching  
44  
45 factors, residual confounding and confounding by unknown factors related to women's choice of  
46  
47 care in labour may persist. Neither can any bias linked to the delayed data collection for 289 FMU  
48  
49 participants from 2004 be ruled out, but we were somewhat reassured to find that the 2004 data  
50  
51 were in conformity with the later data. Our contention that such a risk is limited is also supported by  
52  
53 the fact that no interventions were performed in the study, participants were included on the same  
54  
55 principles, individual and project-specific data collections were performed for all participants,  
56  
57  
58  
59  
60

1  
2  
3  
4 patient records were of good quality, and all control participants were prospectively included. The  
5  
6 obstetric quality indicators, which were compiled annually by the units, were closely followed to  
7  
8 detect any changes in practices or technology use; no systematic changes occurred during the study  
9  
10 period. No new technology was introduced, nor were any major change in obstetrical practices  
11  
12 implemented.  
13  
14

15  
16  
17  
18 Furthermore, some primary outcomes (Apgar scores, postpartum haemorrhage) were exposed to  
19  
20 measurement subjectivity, others were proxies for morbidity, although globally used quality  
21  
22 indicators/research outcomes, and the number of events in some analyses was low. It is also  
23  
24 uncertain whether the outcomes would have been different for the two FMU infants had 1) a  
25  
26 caesarean section not been performed and 2) the infant with severe congenital malformation been  
27  
28 born in the alternative setting. Ideally, the results should be confirmed (or refuted) in a large RCT,  
29  
30 but as the recruitment of an adequately large number of women willing to be randomised to place of  
31  
32 birth would be logistically challenging, the most robust design seems to be a large prospective  
33  
34 cohort study.  
35  
36  
37  
38  
39  
40  
41

### 42 **Strengths**

43  
44 We present findings from the second-largest prospectively controlled study of FMU care. A major  
45  
46 strength of our study is that it compares processes and outcomes from women who have been  
47  
48 prospectively judged to be at low obstetric risk in two well-defined and carefully established  
49  
50 settings in the same region. Also, in contrary to some earlier studies<sup>10;16;29</sup>, the data are complete as  
51  
52 all eligible women planning to give birth in the FMU settings were included, and full follow-up on  
53  
54 all participants was obtained.  
55  
56  
57  
58  
59  
60

## Interpretation

The present study was powered to compare perinatal outcomes estimated by Apgar score <7/5 minutes, neonatal asphyxia and NICU admission >48 hours. No difference was found between the two study groups.

Although the mothers were transferred to the OU without delay (3-23 hours before giving birth), it is concerning that the three NICU stays exceeding one week occurred in the FMU group. Further study of rare adverse outcomes and optimisation of care for transferred women are needed.

The study findings conform with other studies of FMU care<sup>6;10;18;24;26;28;29</sup> that have all reported a reduced incidence of some medical birth interventions while the caesarean section rate is seldom found to be affected, something which may stem from inadequacies in the power or robustness of their design. In this respect, our study forms an important exception.

In addition, the present study is the first to report that FMU women were significantly less likely to experience fetal-pelvic complications, occipital-posterior position of the infant at birth and shoulder dystocia compared to OU women.

Although the study does not enable us to be specific about the individual mechanisms or elements of FMU care leading to decreases in the incidence of caesarean section and birth complications, we would indicate as influencing factors the greater availability of continuous support during labour, the encouragement of women to ambulate and use different position during labour, and the spacious and calm FMU facilities. Continuous support during labour has been proved to reduce birth interventions and the need for pharmaceutical pain relief<sup>50</sup>. Mobilisation and the practice of hand-

1  
2  
3  
4 knee position have furthermore been shown to support fetal rotation into an occipital anterior  
5  
6 position and to reduce the duration of labour<sup>51;52</sup>. In contrast, the use of epidural analgesia and  
7  
8 oxytocin augmentation in OU care both require CTG monitoring and are likely to restrict mobility<sup>53</sup>  
9  
10 and thus use of different labour positions. Furthermore, oxytocin augmentation can cause uterine  
11  
12 hyper-stimulation leading to fetal heart rate abnormality and oxygen desaturation<sup>54</sup>.  
13  
14  
15  
16  
17

18 We suggest that the assessment of the risk of rare adverse outcomes in low-risk FMU births be  
19  
20 balanced against our findings that infant morbidity was not affected and the women intending to  
21  
22 give birth in a FMU are less likely to suffer complications or undergo caesarean section and other  
23  
24 birth interventions when compared to women intending to give birth in an OU.  
25  
26  
27  
28  
29

### 30 **Generalisability**

31  
32 Any generalisation of our findings must consider the full public funding of all maternity services in  
33  
34 Denmark. The FMU midwives were skilled in dealing with obstetric emergencies, cooperation  
35  
36 between FMUs and OUs was excellent, and the local implementation of multi-disciplinary  
37  
38 guidelines for referral and transfer were based on the best evidence available, thus improving the  
39  
40 reliability of care provided. Furthermore, the FMUs were located in community hospitals that  
41  
42 offered life-supporting assistance in emergencies. Generalising to other countries offering different  
43  
44 conditions should be made with caution.  
45  
46  
47  
48  
49

50  
51 Compared to most other countries, Denmark is culturally less diverse and characterised by less  
52  
53 social inequality, with high standards of health and one of the lowest perinatal mortality rates in the  
54  
55 world (6.6 per 1000 in 2004)<sup>55</sup>. However, the FMU women in this study had higher-than-average  
56  
57 BMIs and lower educational and occupational status than Danish women in general<sup>49;56</sup>,  
58  
59  
60

1  
2  
3  
4 characteristics that reflect the life conditions and health status of women in the FMUs' peripheral  
5 catchment area. We take this as an indication that positive outcomes for women choosing FMU care  
6 are not necessarily restricted to women privileged by high socio-economic status or excellent  
7 health, an assumption that is in line with the findings of the so far largest study of FMU care<sup>16</sup>.  
8  
9  
10  
11  
12  
13

14  
15  
16 The distances between the four units studied were 35-55 kilometres; FMU and OU care was thus  
17 not equally accessible to all women. Taking into account the characteristics of women in the study  
18 and the finding of convenience/proximity as the most important factor in North Jutland women's  
19 choice of birthplace<sup>57</sup>, we hypothesise that philosophies/ideas about childbirth play a minor role in  
20 our study in comparison to studies involving women whose choices are not affected by geography.  
21  
22  
23  
24  
25  
26  
27  
28  
29

30 Further work should examine the potential influence of birth expectations and perceptions on  
31 women's choice between FMU and OU care to determine any impact of world-views or  
32 philosophies on birth outcomes. Additional aims would be to elucidate the underlying elements of  
33 FMU care and their influence on outcomes and to explore the potential differences between AMU  
34 care and FMU care. Operational efficiency, cost-effectiveness and rare outcomes also present areas  
35 for further work, the latter through a rigorous review of controlled studies of FMU.  
36  
37  
38  
39  
40  
41  
42  
43  
44  
45

## 46 **Conclusion**

47  
48 In conclusion, the present study found no increase in perinatal morbidity among infants of low-risk  
49 women intending to give birth in an FMU compared to infants of women intending to give birth in  
50 an OU. Among the FMU women it found reduced maternal morbidity, fewer caesarean sections and  
51 other birth interventions, along with an increased likelihood of spontaneous vaginal birth. Further  
52 study of rare adverse outcomes is needed.  
53  
54  
55  
56  
57  
58  
59  
60

1  
2  
3  
4  
5  
6  
7 Care in FMUs may be considered an adequate alternative to OU care for low-risk women. Pregnant  
8  
9 mothers should thus be given an informed basis for their choice of birthing place, with information  
10  
11 on the high risk of transfer during or immediately after birth for primiparous women. FMU care  
12  
13 seems to offer important qualities that should also be brought to bear on the development of OU  
14  
15 care for low-risk women.  
16  
17  
18  
19  
20  
21  
22  
23  
24  
25  
26  
27  
28  
29  
30  
31  
32  
33  
34  
35  
36  
37  
38  
39  
40  
41  
42  
43  
44  
45  
46  
47  
48  
49  
50  
51  
52  
53  
54  
55  
56  
57  
58  
59  
60

For peer review only



### What is already known on this topic

The safety of birth in free-standing midwifery-led units (FMUs) is strongly debated as acute complications may arise in a spite of careful risk assessment of women.

Women's strong preferences in choice of birthplace and a low number of out of OU births form serious barriers for the investigation of rare adverse outcomes in large adequately powered randomised controlled trials.

Studies of various observational design suggest that FMU care for low risk women is related to low perinatal and maternal morbidity, fewer interventions and a decreased use of medical pain relief compared to OU care but the level of evidence is weak and some studies is limited by e.g. the inclusion of high-risk women, low number of participants, and inadequate control of bias and confounding.

### What this study adds

No increase in perinatal morbidity was found among infants of low-risk women who intended birth in an FMU compared to infants of low-risk women who intended birth in an OU. More studies on rare adverse outcomes are needed.

Present study suggest that FMU care has important benefits such as reduced maternal morbidity, reduced use of birth interventions including caesarean sections and increased likelihood of spontaneous vaginal birth compared to OU care. More than one in three primiparas and one in fourteen multiparas is in need of transfer.

Care in FMUs may be considered as an adequate alternative to OU care for low-risk women, and women should be given an informed choice of place of birth, including information on transfer.

### Contributors

Charlotte Overgaard is responsible for the study's conceptual design, designed the data collection tools, and monitored all data collection. She also participated in the cleaning, analysis and interpretation of data, the drafting of the article and wrote the final version. She is guarantor.

Morten Fenger-Grøn participated in the analysis and interpretation of data and the drafting of the

1  
2  
3  
4 article. Anna Margrethe Møller participated in the conceptual design of the study, the interpretation  
5  
6 of data and the drafting of the article. Lisbeth B Knudsen and Jane Sandall participated in the  
7  
8 interpretation of data and the drafting of the article. All of the authors critically reviewed the article  
9  
10 and approved the final version that was submitted for publication.  
11  
12  
13

### 16 **Acknowledgement**

17  
18 We are indebted to the project staff for their dedication to the study. We thank physicians and  
19  
20 midwives at the participating units for their corporation, The Department of Biostatistics, Aalborg  
21  
22 University, epidemiologist Kim Overvad, Aalborg University Hospital, Professor Niels Jørgen  
23  
24 Secher, Hvidovre Hospital, and medical statistician Paul Seed, Division of Women's Health, King's  
25  
26 College London School of Medicine for advice and critical review of the study protocol.  
27  
28  
29  
30  
31  
32

### 33 **Funding**

34  
35 The study was funded by grants from: the Augustinus Foundation, the Obel Family Foundation, the  
36  
37 Oticon Foundation, the University College North Jutland Research and Development Fund, and the  
38  
39 Danish Association of Midwives, all of which are gratefully acknowledged. The work of the authors  
40  
41 was completely independent and the study funders had no influence on the design of the study, the  
42  
43 collection, analysis or interpretation of data, the writing of the manuscript, or its submission for  
44  
45 publication.  
46  
47  
48  
49  
50

### 51 **Competing interests**

52  
53 All authors have completed the Unified Competing Interest form at  
54  
55 [www.icmje.org/coi\\_disclosure.pdf](http://www.icmje.org/coi_disclosure.pdf) (available on request from the corresponding author) and  
56  
57 declare: CO had research grants (paid to her institution) from: the Augustinus Foundation, the Obel  
58  
59 Family Foundation, the Oticon Foundation, the University College North Jutland Research and  
60

1  
2  
3  
4 Development Fund, and the Research Foundation of the Danish Association of Midwives for the  
5  
6 submitted work; no financial relationships with any organisations that might have an interest in the  
7  
8 submitted work in the previous 3 years; no other relationships or activities that could appear to have  
9  
10 influenced the submitted work.  
11  
12

### 13 14 15 16 **Copyright/licence for publication** 17

18 The Corresponding Author has the right to grant on behalf of all authors and does grant on behalf of  
19  
20 all authors an exclusive licence (or non exclusive for government employees) on a worldwide basis  
21  
22 to the BMJ Publishing Group Ltd and its licensees, to permit this article (if accepted) to be  
23  
24 published in BMJ editions and any other BMJPG products and to exploit all subsidiary rights, as set  
25  
26 out in our licence (<http://resources.bmj.com/bmj/authors/checklists-forms/licence-for-publication>).  
27  
28  
29  
30  
31  
32  
33  
34

### 35 36 Reference List

- 37  
38 (1) Delamothe T. Throwing the baby back into the bathwater. *BMJ* 2010; 341:c4192.  
39  
40 (2) Klein MC. The Quebec Midwifery Experiment: Lessons for Canada. *Can J Public Health*  
41 2000; 91(1):5-6.  
42  
43 (3) Moster D, Lie RT, Markestad T. Fornuft og følelser i fødselsomsorgen. *Tidsskr Nor*  
44 *Lægeforen* 2005; 20(125):2818-2820.  
45  
46 (4) Roemer VM, Ramb S. Zentralisierung in der Geburtshilfe: Pro und Contra. *Z Geburtsh*  
47 *Neonatal* 1996; 200:2-12.  
48  
49 (5) Tuffnell D. Editorial: Place of delivery and adverse outcomes. *BMJ* 2010; 341(c5560).  
50  
51 (6) Saunders D, Boulton M, Chapple J. Evaluation of the Edgware Birth Center. Middlesex:  
52 2000.  
53  
54 (7) Waldenström U, Nilsson C-A. Experience of childbirth in birth center care. A Randomized,  
55  
56 Controlled Study. *Acta Obstet Gynecol Scand* 1994; 73:547-554.  
57  
58  
59  
60

- 1
- 2
- 3
- 4
- 5 (8) Coyle KL, Hauck Y, Percival P, Kristjanson LJ. Ongoing relationships with a personal
- 6 focus: mothers' perceptions of birth centre versus hospital care. *Midwifery* 2001; 17(3):171-
- 7 181.
- 8
- 9 (9) Cunningham JD. Experiences of Australian mothers who gave birth either at home, at a birth
- 10 centre or in hospital labour wards. *Soc Sci Med* 1993; 36:475-483.
- 11
- 12 (10) Fraser W et al. Comparison of midwifery care to medical care in hospitals in the Quebec
- 13 pilot projects study: clinical indicators. L'Equipe d'Evaluation des Projets-Pilotes Sages-
- 14 Femmes. *Can J Public Health* 2000; 91;1:I5-I11.
- 15
- 16 (11) Baker SR, Choi PYL, Henshaw CA, Tree J. 'I Felt as though I'd been in Jail': Women's
- 17 Experiences of Maternity Care during Labour, Delivery and the Immediate Postpartum. *Fem*
- 18 *Psychol* 2005; 15(3):315-342.
- 19
- 20 (12) Hodnett ED, Downe S, Walsh D, Weston J. Alternative versus conventional institutional
- 21 settings for birth. *Cochrane Database of Systematic Reviews* 2010;(9):Art. No. CD000012.
- 22 DOI:10.1002/14651858.CD000012.pub3.
- 23
- 24 (13) Hundley VA et al. Satisfaction and the three C's: continuity, choice and control. Women's
- 25 views from a randomised controlled trial of midwife-led care. *Br J Obstet Gynaecol* 1997;
- 26 104:1273-1280.
- 27
- 28 (14) Redshaw M, Heikkila K. Delivered with care: a national survey of women's experience of
- 29 maternity care in England. Oxford: National Perinatal Epidemiology Unit; 2010.
- 30
- 31 (15) National Perinatal Epidemiology Unit. The Birthplace in England Research Programme.
- 32 Report of Component Study 1: Terms and Definitions. England: Oxford University; 2007.
- 33
- 34 (16) Jackson DJ, Lang JM, Swartz WH, Ganiats WG, Fullerton J, Ecker J et al. Outcomes,
- 35 Safety, and Resource Utilization in a Collaborative Care Birth Center Program Compared
- 36 With Traditional Physician-Based Perinatal Care. *Am J Public Health* 2003; 93(6):999-
- 37 1006.
- 38
- 39 (17) Stone PW. Maternity care outcomes: assessing a nursing model of care for low-risk
- 40 pregnancy. *Outcomes Manag Nurs Pract* 1998; 2(2):271-275.
- 41
- 42 (18) Feldman E, Hurst M. Outcomes and procedures in low risk birth: A comparison of hospital
- 43 and birth center settings. *Birth* 1987; 1:18-24.
- 44
- 45 (19) Baird AG, Jewell D, Walker JJ. Management of labour in an isolated rural maternity
- 46 hospital. *BMJ* 1996; 312(7025):223-226.
- 47
- 48 (20) Chamberlain M, Nair R, Nimrod C, Moyer A, England J. Evaluation of a Midwifery
- 49 Birthing Center in the Canadian North. *Circumpolar Health* 1998; 57;Suppl 1:116.-120.
- 50
- 51 (21) David M, Pachaly J, Vetter K, Kentenich H. [Birthplace free-standing birth center --
- 52 perinatal data in comparison with clinic deliveries in Bavaria and Berlin]. *Z Geburtshilfe*
- 53 *Neonatal* 2004; 208(3):110-117.
- 54
- 55
- 56
- 57
- 58
- 59
- 60

- 1  
2  
3  
4  
5  
6  
7  
8  
9  
10  
11  
12  
13  
14  
15  
16  
17  
18  
19  
20  
21  
22  
23  
24  
25  
26  
27  
28  
29  
30  
31  
32  
33  
34  
35  
36  
37  
38  
39  
40  
41  
42  
43  
44  
45  
46  
47  
48  
49  
50  
51  
52  
53  
54  
55  
56  
57  
58  
59  
60
- (22) Eakins PS, O'Reilly Wb, May LJ, Hopkins J. Obstetric outcomes at the birth place in Menlo park: the first seven years. *Birth* 1989; 16:123-129.
  - (23) Reddy K, Reginald PW, Spring JE, Nunn L, Mishra N. A free-standing low-risk maternity unit in the United Kingdom: does it have a role? *J Obstet Gynaecol* 2004; 24(4):360-366.
  - (24) Rooks JP, Weatherby NL, Ernst EK. The National Birth Center Study. Part II--Intrapartum and immediate postpartum and neonatal care. *J Nurse Midwifery* 1992; 37(5):301-330.
  - (25) Schuppe C. 10 Jahre Geburtshaus Charlottenburg. *Kinderkrankenschwester* 1997; 16(10):429-430.
  - (26) Scupholme A, McLeod AGW, obertson EG. A birth center affiliated with the tertiary care center: Comparison of outcome. *Obstet Gynecol* 1986; 4:598-603.
  - (27) Schmidt N, Abelsen B, Øian P. Deliveries in maternity homes in Norway: results from a 2-year prospective study. *Acta Obstet Gynecol Scand* 2002; 8;8:731-737.
  - (28) David M, Kraker von Schwarzenfeld H, Dimer JAS, Kentenich H. Perinatal outcome in hospital and birth center obstetric care. *Int J Gynaecol Obstet* 1999; 65(2):149-156.
  - (29) Stone PW, Walker PH. Clinical and Cost Outcomes of a Free-standing Birth Center: A Comparison Study. *Clin Excell Nurse Pract* 1997; 7:456-465.
  - (30) Swartz W, Jackson D, Lang J, Ecker J, Ganiats T, Dickinson C et al. The BirthPlace collaborative practice model: results from the San Diego Birth Center Study. *Prim Care Update Ob Gyns* 1998; 1;5(4):207.
  - (31) Stewart M, McCandlish R, Henderson J, Brocklehurst P. Review of evidence about clinical, psychosocial and economic outcomes for women with straightforward pregnancies who plan to give birth in a midwife-led birth centre, and outcomes for their babies. Oxford: The National Perinatal Epidemiology Unit; 2005.
  - (32) Hendrix M, Van HM, Moreta D, Nieman F, Nieuwenhuijze M, Severens J et al. Why women do not accept randomisation for place of birth: feasibility of a RCT in The Netherlands. *BJOG* 2009; 116(4):537-542.
  - (33) Matzen B. Behovet for jordemoderlede fødeklinikker på Fyn samt analyse og markedsføring af det frie sygehusvalg i forbindelse med graviditet og fødsel. Speciale. Center for Cand. Negot. Studiet. [ Odense: Syddansk Universitet; 1997.
  - (34) Vandenbroucke JP, von Elm E, Altman DG, Gotzsche PC, Mulrow CD, Pocock SJ et al. Strengthening the Reporting of Observational Studies in Epidemiology (STROBE): explanation and elaboration. *Epidemiology* 2007; 18(6):805-835.
  - (35) von Elm E, Altman DG, Egger M, Pocock SJ, Gotzsche PC, Vandenbroucke JP. Strengthening the Reporting of Observational Studies in Epidemiology (STROBE) statement: guidelines for reporting observational studies. *BMJ* 2007; 335(7624):806-808.

- 1  
2  
3  
4  
5 (36) Justitsministeriet. Lov nr. 429 om behandling af personoplysninger af 31. maj 2000 som  
6 ændret ved lov nr. 280 af 25. april 2001.  
7  
8 (37) Cummings P, McKnight B, Greenland S. Matched Cohort Methods for Injury Research.  
9 *Epidemiol Rev* 2003; 25:43-50.  
10  
11 (38) Greenland S, Morgenstern H. Matching and efficiency in cohort studies. *Am J Epidemiol*  
12 1990; 131(1):151-159.  
13  
14  
15 (39) Faresjo T, Faresjo A. To match or not to match in epidemiological studies--same outcome  
16 but less power. *Int J Environ Res Public Health* 2010; 7(1):325-332.  
17  
18 (40) Lorentzen A, Krogh R. Oplevelsesøkonomi, udvikling og planlægning i Nordjyske  
19 kommuner. Aalborg: Institut for samfundsudvikling og planlægning, Aalborg University;  
20 2009.  
21  
22  
23 (41) Danmarks Statistik. Statistikbanken. 03.02.2011.  
24 <http://www.statistikbanken.dk/statbank5a/default.asp?w=1280>.  
25  
26 (42) Mortensen LH, Diderichsen F, Davey Smith G, Nybo Andersen AM. Time is on whose  
27 side? Time trends in the association between maternal social disadvantage and offspring  
28 fetal growth. A study of 1 409 339 births in Denmark, 1981-2004. *J Epidemiol Community*  
29 *Health* 2009; 63(4):281-285.  
30  
31  
32 (43) Gissler M, Rahkonen O, Arntzen A, Cnattingius S, Andersen AM, Hemminki E. Trends in  
33 socioeconomic differences in Finnish perinatal health 1991-2006. *J Epidemiol Community*  
34 *Health* 2009; 63(6):420-425.  
35  
36  
37 (44) Wilkinson RG, Pickett K. The Spirit Level: Why equality is better for every one. United  
38 Kingdom: Penguin Books Ltd; 2010.  
39  
40 (45) Blumenshine P, Egerter S, Barclay CJ, Cubbin C, Braveman PA. Socioeconomic disparities  
41 in adverse birth outcomes: a systematic review. *Am J Prev Med* 2010; 39(3):263-272.  
42  
43 (46) National Institute for health and clinical excellence. Intrapartum care for healthy women and  
44 their babies during childbirth. NICE clinical guideline 55. 2007.  
45  
46  
47 (47) Deeks JJ, Dinnes J, D'Amico R, Sowden AJ, Sakarovich C, Song F et al. Evaluating non-  
48 randomised intervention studies. *Health Technol Assess* 2003; 7(27):iii-173.  
49  
50 (48) Rawlins MD. DE TESTIMONIO. On the evidence for decisions about the use of therapeutic  
51 interventions. THE HARVEIAN ORATION. Delivered before the Fellows of The Royal  
52 College of Physicians of London on Thursday 16 October 2008. Royal College of  
53 Physicians; 2008.  
54  
55  
56 (49) The Region of North Jutland. Population information 01.02.2011.  
57 <http://www.rn.dk/Regionen/FaktaOmNordjylland/Befolkning.htm>. Denmark: 2011.  
58  
59  
60

- 1  
2  
3  
4  
5  
6  
7  
8  
9  
10  
11  
12  
13  
14  
15  
16  
17  
18  
19  
20  
21  
22  
23  
24  
25  
26  
27  
28  
29  
30  
31  
32  
33  
34  
35  
36  
37  
38  
39  
40  
41  
42  
43  
44  
45  
46  
47  
48  
49  
50  
51  
52  
53  
54  
55  
56  
57  
58  
59  
60
- (50) Hodnett ED, Gates S, Hofmeyr GJ, Sakala C. Continuous support for women during childbirth. *Cochrane Database of Systematic Reviews* 2007; art. no.:CD003766. DOI: 10.1002/14651858.CD003766.pub2.
- (51) Gupta J, Hofmeyr G, Smyth R. Position in the second stage of labor for women without epidural analgesia. *Cochrane Database Syst Rev* 3 2005; art.no:CD002006.DOI:002010.001002 / 14651858.CD14002006.pub14651852.
- (52) Lawrence A, Levis L, Hofmeyr G, et al. Maternal positions and mobility during the first stage of labour. *Cochrane Database Syst Rev* 2 2009; art.no: CD003934;doi:003910.001002 / 14651858.CD14003934.pub14651852.
- (53) Gabbe SG, Niebyl JR, Simpson JL (eds). *Obstetrics : Normal and Problem Pregnancies*. 4 ed. USA: Churchill Livingstone; 2002.
- (54) Simpson KR, James DC. Effects of oxytocin-induced uterine hyperstimulation during labor on fetal oxygen status and fetal heart rate patterns. *Am J Obstet Gynecol* 2008; 199(1):34-35.
- (55) World Health Organisation. Neonatal and perinatal mortality: country, regional and global estimates. WHO; 2006.
- (56) Sundhedsstyrelsen. Fødsler, graviditet og BMI - 1. halvår 2008. København: Sundhedsstyrelsen; 2008.
- (57) Bonderup T, Nibe M, Jensen T. Valg af fødested - en undersøgelse af gravides valg af fødested og deres ønsker for tilbud på fødeklinikker. Aalborg: Nordjyllands Amt. Center for Kompetenceudvikling; 2005.

1  
2  
3  
4  
5  
6  
7  
8  
9  
10  
11  
12  
13  
14  
15  
16  
17  
18  
19  
20  
21  
22  
23  
24  
25  
26  
27  
28  
29  
30  
31  
32  
33  
34  
35  
36  
37  
38  
39  
40  
41  
42  
43  
44  
45  
46  
47  
48  
49  
50  
51  
52  
53  
54  
55  
56  
57  
58  
59  
60

Tables and figures, chronological order:

Figure 1: Study flow chart

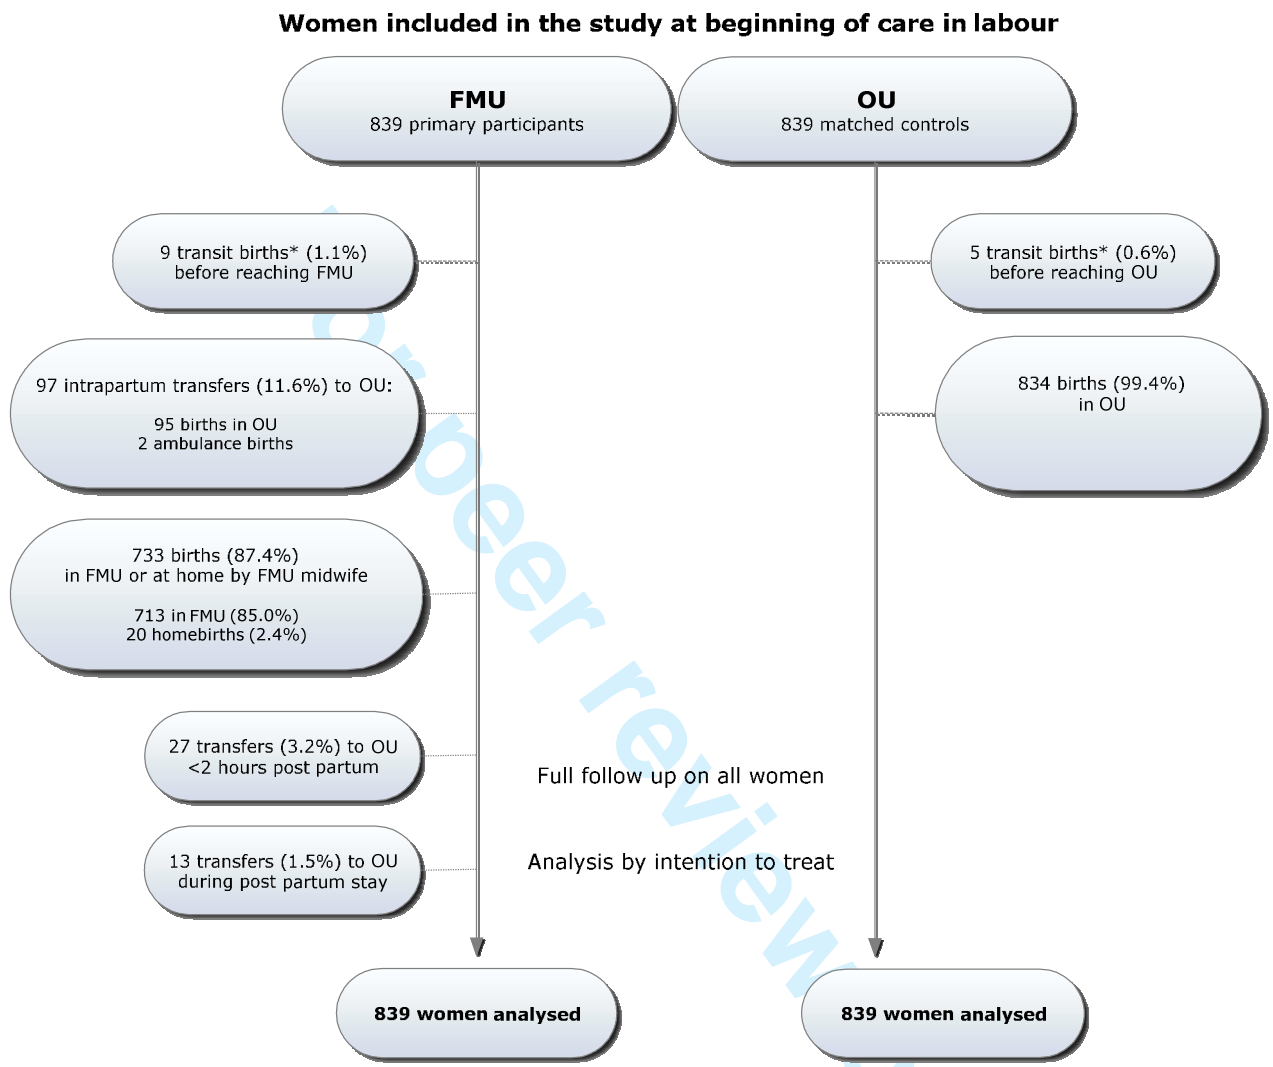

\* Birth occurring unplanned at home or during transport were included if the woman <24 hours before had consulted a midwife and been advised to stay at home longer / return to her home



**Table 1: Matching characteristics**

| Characteristics                                        | FMU | (%)    | OU  | (%)    |
|--------------------------------------------------------|-----|--------|-----|--------|
| <b>Complete match retained in all cases</b>            |     |        |     |        |
| <b>Obstetric risk status</b>                           |     |        |     |        |
| Low risk                                               | 839 | (100)  | 839 | (100)  |
| <b>Parity</b>                                          |     |        |     |        |
| Primiparous                                            | 215 | (25.6) | 215 | (25.6) |
| Multiparous                                            | 624 | (74.4) | 624 | (74.4) |
| <b>Smoking status</b>                                  |     |        |     |        |
| Non-smoker                                             | 684 | (81.5) | 684 | (81.5) |
| 1-9 cigarettes                                         | 59  | (7.0)  | 59  | (7.0)  |
| 10 or more cigarettes                                  | 96  | (11.5) | 96  | (11.5) |
| <b>Individuals matched within ranges/groups</b>        |     |        |     |        |
| <b>BMI</b>                                             |     |        |     |        |
| <18                                                    | 17  | (2.1)  | 22  | (2.6)  |
| 18-24.9                                                | 528 | (62.9) | 530 | (63.2) |
| 25-29.9                                                | 226 | (26.9) | 219 | (26.1) |
| >30                                                    | 68  | (8.1)  | 68  | (8.1)  |
| <b>Age</b>                                             |     |        |     |        |
| 16-20                                                  | 24  | (2.9)  | 25  | (3.0)  |
| 21-35                                                  | 731 | (87.1) | 716 | (85.3) |
| >35                                                    | 84  | (10.0) | 98  | (11.7) |
| <b>Ethnicity</b>                                       |     |        |     |        |
| Nordic or Western European                             | 805 | (96.0) | 809 | (96.4) |
| Eastern European or Asian                              | 27  | (3.2)  | 22  | (2.6)  |
| Arab or African                                        | 7   | (0.8)  | 8   | (1.0)  |
| <b>Education level*</b>                                |     |        |     |        |
| No training/education qualifying for the labour market | 216 | (25.7) | 217 | (25.9) |
| Skilled training                                       | 255 | (30.4) | 255 | (30.4) |

1  
2  
3  
4  
5  
6  
7  
8  
9  
10  
11  
12  
13  
14  
15  
16  
17  
18  
19  
20  
21  
22  
23  
24  
25  
26  
27  
28  
29  
30  
31  
32  
33  
34  
35  
36  
37  
38  
39  
40  
41  
42  
43  
44  
45  
46  
47  
48  
49  
50  
51  
52  
53  
54  
55  
56  
57  
58  
59  
60

|                                           |     |        |     |        |
|-------------------------------------------|-----|--------|-----|--------|
| 1-2 ½ years of post-secondary education   | 84  | (10.0) | 81  | (9.6)  |
| 3-4 years of post-secondary education     | 254 | (30.3) | 256 | (30.5) |
| 5-6 years of post-secondary education     | 30  | (3.6)  | 30  | (3.6)  |
| <b>Occupation</b>                         |     |        |     |        |
| No paid work                              | 160 | (19.1) | 131 | (15.6) |
| Unskilled work                            | 107 | (12.7) | 119 | (14.2) |
| Skilled work <sup>‡</sup>                 | 542 | (64.6) | 557 | (66.4) |
| Academic work/manager or senior official: | 30  | (3.6)  | 32  | (3.8)  |
| <b>Cohabitation status</b>                |     |        |     |        |
| Living with partner                       | 815 | (97.1) | 819 | (97.6) |
| Not living with partner                   | 24  | (2.9)  | 20  | (2.4)  |

\* Students and trainees were classified along with the educational level for which they were being trained

<sup>‡</sup> All non-academic/non-managerial vocations requiring 1-4 years of post-secondary education/training<sup>61</sup>

Peer review only

**Table 2: Primary outcomes**

|                                                    | FMU (%)    | OU (%)     | RR   | 95%CI     | P-value |
|----------------------------------------------------|------------|------------|------|-----------|---------|
| <b>Perinatal</b>                                   |            |            |      |           |         |
| Abnormal fetal heart rate leading to action        | 34 (4.1)   | 98 (11.7)  | 0.3  | 0.2-0.5   | 0.0000  |
| Apgar score <7 after 1 min                         | 22 (2.6)   | 25 (3.0)   | 0.9  | 0.5-1.6   | 0.7709  |
| Apgar score <9 after 5 min                         | 15 (1.8)   | 20 (2.4)   | 0.8  | 0.4-1.5   | 0.4996  |
| Apgar score <7 after 5 min                         | 5 (0.6)    | 5 (0.6)    | 1    | 0.3-3.4   | 1.0000  |
| Neonatal asphyxia                                  | 27 (3.2)   | 41 (4.9)   | 0.7  | 0.4-1.1   | 0.1143  |
| Neonatal admittance to NICU                        | 28 (3.3)   | 42 (5.0)   | 0.7  | 0.4-1.1   | 0.1143  |
| Neonatal stay in NICU >48 hours                    | 14 (1.7)   | 15 (1.8)   | 0.9  | 0.5-1.9   | 1.0000  |
| Child readmitted to hospital 0-28 days postpartum  | 26 (3.1)   | 35 (4.2)   | 0.7  | 0.4-1.1   | 0.1480  |
| <b>Maternal</b>                                    |            |            |      |           |         |
| Spontaneous vaginal birth                          | 796 (94.9) | 751 (89.5) | 1.06 | 1.03-1.09 | 0.0000  |
| Caesarean section                                  | 19 (2.3)   | 34 (4.0)   | 0.6  | 0.3-0.9   | 0.0400  |
| Instrumental delivery*                             | 25 (3.0)   | 61 (7.8)   | 0.4  | 0.3-0.6   | 0.0000  |
| Epidural analgesia                                 | 35 (4.2)   | 86 (10.3)  | 0.4  | 0.3-0.6   | 0.0000  |
| Emission in water for pain relief                  | 269 (32.1) | 197 (23.5) | 1.4  | 1.2-1.6   | 0.0001  |
| Pudendal nerve block                               | 3 (0.4)    | 21 (2.5)   | 0.1  | 0.0-0.5   | 0.0000  |
| Postpartum haemorrhage >500 ml                     | 29 (3.5)   | 68 (8.1)   | 0.4  | 0.3-0.7   | 0.0001  |
| Intact perineum                                    | 514 (61.3) | 466 (55.5) | 1.1  | 1.02-1.2  | 0.0142  |
| 1st <sup>st</sup> 2 <sup>nd</sup> degree tear      | 290 (34.6) | 337 (40.2) | 0.9  | 0.8-0.97  | 0.0154  |
| Readmission /outpatient visit 0-28 days postpartum | 24 (2.9)   | 40(4.8)    | 0.6  | 0.4-1.0   | 0.0599  |

\*FMU midwives had extended authorisation to perform ventouse deliveries in case of acute fetal distress in the second stage of labour. This was used only once, in a case of acute bradycardia. Apgar score 2/1, 8/5, 10/10.

Table 3: Secondary outcomes

| Outcome                                                | FMU (n)    | OU (n)         | RR  | 95%CI    | P-value |
|--------------------------------------------------------|------------|----------------|-----|----------|---------|
| <b>Perinatal</b>                                       |            |                |     |          |         |
| Child live born                                        | 839        | 839            |     |          |         |
| Perinatal and neonatal death                           | 1*         | 0              |     |          |         |
| <b>Maternal</b>                                        |            |                |     |          |         |
| Severe maternal morbidity                              | 0          | 1 <sup>±</sup> |     |          |         |
| Dystocia in labour                                     | 88 (10.5)  | 234 (27.9)     | 0.4 | 0.3-0.5  | 0.0000  |
| Intrapartum fetal-pelvic complications <sup>‡</sup>    | 3 (0.4)    | 16 (1.9)       | 0.2 | 0.05-0.6 | 0.0044  |
| Shoulder dystocia                                      | 3 (0.4)    | 12 (1.4)       | 0.3 | 0.1-0.9  | 0.0352  |
| Meconium-stained amniotic fluid                        | 136 (16.2) | 148 (17.6)     | 0.9 | 0.7-1.1  | 0.4004  |
| Occipital posterior presentation at birth <sup>π</sup> | 13 (1.6)   | 28 (3.3)       | 0.5 | 0.3-0.9  | 0.0201  |
| Postpartum haemorrhage > 1000 ml                       | 11 (1.3)   | 14 (1.7)       | 0.8 | 0.4-1.7  | 0.6900  |
| 3rd and 4th degree tears                               | 19 (2.3)   | 24 (2.9)       | 0.8 | 0.4-1.4  | 0.5224  |
| <b>Birth interventions</b>                             |            |                |     |          |         |
| Oxytocin augmentation of labour                        | 69 (8.2)   | 154 (18.6)     | 0.5 | 0.3-0.6  | 0.0000  |
| Treatment for shoulder dystocia                        | 1 (0.1)    | 10 (1.2)       | 0.1 | 0.01-0.8 | 0.0117  |
| One or more uterotonics                                | 675 (80.5) | 672 (80.1)     | 1.0 | 0.9-1.0  | 0.9070  |
| Perineal suturing                                      | 294 (35.0) | 366 (43.6)     | 0.8 | 0.7-0.9  | 0.0002  |
| Intrauterine palpation                                 | 5 (0.6)    | 16 (1.9)       | 0.3 | 0.1-0.9  | 0.0266  |
| <b>Other</b>                                           |            |                |     |          |         |
| Non recumbent position for birth                       | 188 (22.4) | 158 (18.3)     | 1.2 | 0.98-1.4 | 0.0964  |
| Discharge <6 hours postpartum                          | 106 (12.6) | 191 (22.8)     | 0.6 | 0.5-0.7  | 0.0000  |
| Transfers intrapartum or <2 hours after birth          | 124 (14.8) |                |     |          |         |
| <i>Of these primiparas</i>                             | 79 (36.7)  |                |     |          |         |
| <i>Of these multiparas</i>                             | 45 (7.2)   |                |     |          |         |

\*The infant was born with severe diaphragmatic hernia, not detected by ultrasound screening at 19.4 weeks.

<sup>±</sup> Uterine rupture followed by peripartum hysterectomy in a multipara having epidural analgesia and oxytocin augmentation

<sup>‡</sup> Including diagnosis for: abnormal maternal pelvis, cephalopelvic disproportion and failed ventouse delivery

<sup>π</sup> Deliveries by caesarean section excluded from this analysis

1  
2  
3  
4  
5  
6  
7  
8  
9  
10  
11  
12  
13  
14  
15  
16  
17  
18  
19  
20  
21  
22  
23  
24  
25  
26  
27  
28  
29  
30  
31  
32  
33  
34  
35  
36  
37  
38  
39  
40  
41  
42  
43  
44  
45  
46  
47  
48  
49  
50  
51  
52  
53  
54  
55  
56  
57  
58  
59  
60

| <b>Table 4: Causes of FMU to OU transfer</b>                                        | <b>Number</b> | <b>%</b>     |
|-------------------------------------------------------------------------------------|---------------|--------------|
| <b>Before birth</b>                                                                 |               |              |
| Failure to progress                                                                 | 55            | (40.1)       |
| Meconium-stained amniotic fluid                                                     | 14            | (10.2)       |
| Fetal heart rate abnormality                                                        | 10            | (7.2)        |
| Prolonged latent phase                                                              | 7             | (5.1)        |
| Request for epidural analgesia                                                      | 6             | (4.3)        |
| Abnormal fetal presentation (including caudal presentation)                         | 5             | (3.6)        |
| <b>Between birth and 2 hours postpartum</b>                                         |               |              |
| Perineal trauma (complicated/3 <sup>rd</sup> -4 <sup>th</sup> degree tear)          | 16            | (11.7)       |
| Retained placenta/postpartum haemorrhage                                            | 9             | (6.6)        |
| Minor respiratory problem (infant)                                                  | 2             | (1.5)        |
| <b>More than 2 hours postpartum</b>                                                 |               |              |
| Neonatal cause (light for date, minor respiratory problem, hypoglycaemia, jaundice) | 11            | (5.2)        |
| Maternal cause (post partum bleeding, infection)                                    | 2             | (1.5)        |
| <b>Total number of transfers from FMU</b>                                           | <b>137</b>    | <b>(100)</b> |

**The following 3 tables is provided for supplementary information (electronic supplement)**

## Supplementary information:

Table A: Characteristics of freestanding midwifery-led units

|                                                           | Hobro FMU                                                                                                                                                                                             | Frederikshavn FMU                                                                                                                                                                                      |
|-----------------------------------------------------------|-------------------------------------------------------------------------------------------------------------------------------------------------------------------------------------------------------|--------------------------------------------------------------------------------------------------------------------------------------------------------------------------------------------------------|
| <b>Geographical setting</b>                               | District/community hospital, southern town in region (11 000 inhabitants)                                                                                                                             | District/community hospital, northern town in region (24 000 inhabitants)                                                                                                                              |
| <b>Obstetrical assistance</b>                             | Not available<br>No epidurals or argumentation                                                                                                                                                        | Not available<br>No epidurals or argumentation                                                                                                                                                         |
| <b>Assistance for maternal and neonatal emergencies *</b> | 24-hour emergency assistance on site from anaesthesiologist (day) / resuscitation-capable specialist nurse (evening + night).                                                                         | 24-hour emergency assistance on site from anaesthesiologist (day) / resuscitation-capable specialist nurse (evening + night).                                                                          |
| <b>Midwifery staff and training</b>                       | Experienced local midwives whose employment predated unit's conversion into FMU, working in 24 hour shifts<br>Mannequin training in obstetrical emergencies, including ventouse delivery <sup>±</sup> | Experienced local midwives whose employment predated unit's conversion into FMU, working in 24 hour shifts.<br>Mannequin training in obstetrical emergencies, including ventouse delivery <sup>±</sup> |
| <b>Minimum transfer time</b>                              | 35 minutes                                                                                                                                                                                            | 25 minutes                                                                                                                                                                                             |
| <b>Women transferred to</b>                               | OU, Aalborg Hospital                                                                                                                                                                                  | OU, Vendsyssel Hospital                                                                                                                                                                                |
| <b>Some women may choose transfer to:</b>                 | OU, Randers Hospital or OU, Viborg Hospital (out-of-region hospitals)                                                                                                                                 | OU, Aalborg Hospital                                                                                                                                                                                   |
| <b>Number of birthing rooms</b>                           | 2                                                                                                                                                                                                     | 2                                                                                                                                                                                                      |
| <b>Birthing facilities</b>                                | Conventional birthing rooms with easy access to birthing pool and shower. Other facilities such as resting room, living room, corridor and kitchen were also used                                     | Large birthing rooms with birthing pool, shower and both double bed and obstetric bed. Other facilities such as living room, corridor and kitchen were also used                                       |
| <b>Care characteristics</b>                               | One-to-one care and continuous support in labour most often available<br>Mobility and use of different labour positions supported. Music used for relaxation                                          | One-to-one care and continuous support in labour most often available<br>Mobility and use of different labour positions supported. Music used for relaxation                                           |

|                                |                                                                                                                                                                              |                                                                                                                                                                                        |
|--------------------------------|------------------------------------------------------------------------------------------------------------------------------------------------------------------------------|----------------------------------------------------------------------------------------------------------------------------------------------------------------------------------------|
| <b>Cardiotocography (CTG)</b>  | Admission CTG offered to all women<br>Transfer performed if CTG indicated                                                                                                    | Admission CTG offered to all women<br>Transfer performed if CTG indicated                                                                                                              |
| <b>Early labour assessment</b> | Home visits occasionally offered                                                                                                                                             | Home visits occasionally offered (10-20%)                                                                                                                                              |
| <b>Homebirth<sup>‡</sup></b>   | Offered as part of service                                                                                                                                                   | Offered as part of service                                                                                                                                                             |
| <b>Postnatal care</b>          | 3-4 days in family rooms, family friendly environment, always possible for partner to stay. No postnatal staff during night<br>Full 'baby-friendly' WHO/UNICEF accreditation | 3-4 days in 2-bed postnatal rooms, family friendly environment, always possible for partner to stay. No postnatal staff during night.<br>Full 'baby-friendly' WHO/UNICEF accreditation |
| <b>Antenatal care</b>          | The region's 'standard package' of antenatal care offered by FMU midwives                                                                                                    | The region's 'standard package' of antenatal care offered by FMU midwives                                                                                                              |

\* Only for emergencies such as maternal collapse, severe postpartum haemorrhage or need for neonatal resuscitation.

<sup>‡</sup>Ventouse delivery is included in the ICM Essential Competencies for Midwifery Practice and midwives in many different settings and countries (including FMUs in e.g. the UK, Norway and Denmark) have acquired the necessary skills

<sup>‡</sup> As selection criteria for home birth and FMU were identical, both home birth and FMU birth were offered to all low-risk women by FMU midwives. Decision about place of birth could be changed at any time, also during labour.

## Supplementary information:

Table B: Characteristics of obstetric units

| Characteristics                           | Aalborg OU                                                                                                                             | Vendsyssel OU                                                                                                                          |
|-------------------------------------------|----------------------------------------------------------------------------------------------------------------------------------------|----------------------------------------------------------------------------------------------------------------------------------------|
| <b>Geographical setting</b>               | Specialist, university hospital, located in main city of the region (120.000 inhabitants)                                              | Provincial hospital, centrally placed in the North of the region (25.000 inhabitants)                                                  |
| <b>Facilities</b>                         | Neonatal intensive care unit<br>Neonatal surgical<br>Adult intensive care                                                              | Generalised paediatric unit with neonatal beds<br>Adult intensive care unit                                                            |
| <b>Consultant obstetrician</b>            | 24-hour service on site                                                                                                                | On site during daytime                                                                                                                 |
| <b>Consultant paediatrician</b>           | 24-hour service on site                                                                                                                | On site during daytime                                                                                                                 |
| <b>Consultant anaesthesiologist</b>       | 24-hour service on site                                                                                                                | On site during daytime ( resuscitation-capable specialist nurse on site during night)                                                  |
| <b>Midwifery staff</b>                    | Mixed level of experience<br>24-hour consultant midwife on site                                                                        | Mixed level of experience<br>Consultant midwife on site during daytime                                                                 |
| <b>Number of labour rooms</b>             | 12                                                                                                                                     | 5                                                                                                                                      |
| <b>Birthing facilities</b>                | Conventional birthing rooms. 1 room with birthing pool, access to two labour pools<br>Most women stay in birthing room during labour   | Conventional birthing rooms, two rooms with birthing pool<br>Most women stay in birthing room during labour                            |
| <b>Care characteristics</b>               | One-to-one care and continuous support in labour typically not available                                                               | One-to-one care and continuous support in labour typically not available                                                               |
| <b>CTG</b>                                | No admission CTG<br>Auscultation used in low-risk labour (continuous CTG used in case of oxytocin augmentation and epidural analgesia) | No admission CTG<br>Auscultation used in low-risk labour (continuous CTG used in case of oxytocin augmentation and epidural analgesia) |
| <b>Early labour assessment</b>            | Home visits not offered                                                                                                                | Home visits not offered                                                                                                                |
| <b>Postnatal care (complicated birth)</b> | Conventional postnatal ward (nurse staff)<br>2-4 postnatal beds per room                                                               | Conventional postnatal ward (nurse staff)<br>2-4 postnatal beds per room                                                               |



|                                                       |                                                                                                                                                |                                                                                                                                                                  |
|-------------------------------------------------------|------------------------------------------------------------------------------------------------------------------------------------------------|------------------------------------------------------------------------------------------------------------------------------------------------------------------|
| <b>Postnatal care</b><br><i>(uncomplicated birth)</i> | 3-4 days on midwifery-led ward<br>2-4 postnatal beds per room<br>Rarely possible for partner to stay<br>Postnatal staff on ward 24 hours a day | 3-4 days in same conventional postnatal ward<br>as women with complicated birth<br>Rarely possible for partner to stay<br>Postnatal staff on ward 24 hours a day |
| <b>Antenatal care</b>                                 | The region's 'standard package' of antenatal care offered by OU midwives                                                                       | The region's 'standard package' of antenatal care offered by OU midwives                                                                                         |

**Supplementary information**

**Table C: Adverse outcomes:** maternal morbidity, perinatal death, 5 min Apgar score<7, >1 week NICU stay

| Cases                                  | Apgar score | Birth characteristics                                                                                                                                                                                                                                                                                                                                                                                                                                                                                                                                                                                                                                                                                                                                                                               | Place of birth | Days in NICU | Neonatal events                                                                                                                                                                                                                                                  |
|----------------------------------------|-------------|-----------------------------------------------------------------------------------------------------------------------------------------------------------------------------------------------------------------------------------------------------------------------------------------------------------------------------------------------------------------------------------------------------------------------------------------------------------------------------------------------------------------------------------------------------------------------------------------------------------------------------------------------------------------------------------------------------------------------------------------------------------------------------------------------------|----------------|--------------|------------------------------------------------------------------------------------------------------------------------------------------------------------------------------------------------------------------------------------------------------------------|
| <b>Freestanding Midwifery-led Unit</b> |             |                                                                                                                                                                                                                                                                                                                                                                                                                                                                                                                                                                                                                                                                                                                                                                                                     |                |              |                                                                                                                                                                                                                                                                  |
| Case 1                                 | 3/5         | <b>The only case of perinatal/neonatal mortality in the study</b><br>Multipara<br>FMU in active labour, normal admission CTG, clear amniotic fluid, spontaneous vaginal birth. Respiratory failure 2-3 minutes after birth. Anaesthesiological assistance called, immediate <b>advanced resuscitation attempted but the infant did not response.</b><br><br>The rare and severe condition of the infant was not detected by antenatal ultrasound screening at 19.4 weeks. Had the mother not chosen FMU care, this infant would most likely have been born in the nearest OU, here located in a provincial hospital with a generalised paediatric unit (consultant paediatrician, obstetrician and anaesthesiologist on call outside daytime). Transfer required to specialised unit (305 km away). | FMU            | 0            | <b>Infant dead</b><br><br><b>Severe congenital malformation</b> (diaphragmatic hernia).<br><br>Occurrence 1:2500-1:5000, approx. 40% of infants have additional malformations.<br>Total mortality (Danish population): 43%<br><br>Advanced resuscitation on site |
| Case 2                                 | 4/5         | Primipara<br>Primary rupture of membranes, FMU 20 hours later, 1 cm cervical dilatation, normal admission CTG. Transferred to OU 6 hours later (3 cm dilatation) due to slow progress of labour and request for epidural.<br><u>In OU:</u> shared care (OU midwife and obstetrician). Epidural, augmentation of labour, pathological CTG pattern. Pyrexia,                                                                                                                                                                                                                                                                                                                                                                                                                                          | OU             | 36 *         | Ventilation<br>Admitted to NICU shortly after birth, treated for sepsis and asphyxia. Continuous positive airway pressure (CPAP) and antibiotics. <b>Severe congenital heart disease</b> , surgery at 6                                                          |

|        |       |                                                                                                                                                                                                                                                                                                                                                                                                                           |     |            |                                                                                                                                                                                                           |
|--------|-------|---------------------------------------------------------------------------------------------------------------------------------------------------------------------------------------------------------------------------------------------------------------------------------------------------------------------------------------------------------------------------------------------------------------------------|-----|------------|-----------------------------------------------------------------------------------------------------------------------------------------------------------------------------------------------------------|
|        |       | meconium-stained fluid, fetal blood sampling, episiotomy, instrumental delivery of infant 7 hours after transfer                                                                                                                                                                                                                                                                                                          |     |            | months<br>Discharged well                                                                                                                                                                                 |
| Case 3 | 5/5   | Primipara<br>Primary rupture of membranes, presents at FMU 10 hours later, clear amniotic fluid, latent phase. Returns home after 6 hours, transferred to OU 24 hours after rupture of membranes.<br><u>In OU:</u> shared care (OU midwife and obstetrician). Cervical dilatation 1 cm, augmentation of labour, no antibiotics, meconium-stained fluid. Spontaneous vaginal birth 6.5 hours after transfer.               | OU  | 5.7        | No ventilation, short intubation for trachea suction. Admitted to NICU shortly after birth due to asphyxia and meconium aspiration CPAP, antibiotics<br>Discharged well                                   |
| Case 4 | 5/5   | Primipara<br>FMU during latent phase, 1 cm cervical dilatation. Normal admission CTG. After 9 hours, cervix dilated 3 cm, transferred to OU due to protracted latent phase<br><u>In OU:</u> shared care (OU midwife and obstetrician). Amniotomy, augmentation of labour, epidural, CTG. Occipital posterior position, clear amniotic fluid. After 23 hours in OU, spontaneous vaginal birth                              | OU  | 0          | No ventilation<br>Child not admitted to NICU<br>Discharged well                                                                                                                                           |
| Case 5 | 6/5   | Multipara<br>FMU at 2 cm cervical dilatation. Normal admission CTG. Transferred to OU 8 hours later because of no progress<br><u>In OU:</u> shared care (FMU midwife and obstetrician). Augmentation of labour, epidural. Pyrexia, antibiotics. Clear amniotic fluid. Caesarean section 5 hours after transfer because of pathological CTG                                                                                | OU  | 0.6        | Ventilation, no chest compressions.<br>Birth weight low for gestational age (2554 g). Child admitted to NICU for 14 hours, observation only<br>Discharged well                                            |
| Case 6 | (7/5) | Multipara<br>FMU at 2 cm cervical dilatation, frequent painful contractions. <b>Admission CTG with pathological pattern, emergency transferred to OU</b> 1 hour after admittance. Tocolytic given for transfer, CTG pattern improves<br><u>In OU:</u> shared care (FMU midwife and obstetrician). CTG, Caesarean section 4 hours after transfer due to fetal distress. Abruptio placentae                                 | OU  | 12.5<br>** | Ventilation, no chest compressions.<br>Admitted to NICU shortly after birth. CPAP and antibiotics. 2 days later, acute apnoea:<br>Intubation, ventilation and transfer<br>Discharged well                 |
| Case 7 | (7/5) | Primipara<br>FMU at 1 cm cervical dilatation. Normal admission CTG. Transferred to OU 10 hours later at 7 cm cervical dilatation because of slow progress of labour<br><u>In OU:</u> shared care (OU midwife and obstetrician). Augmentation of labour, CTG, spontaneous vaginal birth 3 hours after transfer                                                                                                             | OU  | 11<br>***  | No ventilation<br>Admitted to NICU shortly after birth for respiratory problems.<br>CPAP<br>Discharged well                                                                                               |
| Case 8 | 10/5  | <b>Adverse event with potential adverse outcome</b><br>Multipara: Umbilical cord prolapse in multipara after spontaneous rupture of membranes. Local gynaecologist is summoned against protocol and an emergency caesarean section performed.<br>Had guidelines been followed, the woman would have had a tocolytic, pelvic elevation, and the infant would have been pushed up vaginally while an emergency transfer was | FMU | 0          | The event happened less than two months after the maternity unit had been turned into a FMU.<br>The staff involved had previously worked closely together and chose not to follow the regional guidelines |

|                       |            |                                                                                                                                                                                                                                                                                                                                                                                             |    |     |                                                                                                                                       |
|-----------------------|------------|---------------------------------------------------------------------------------------------------------------------------------------------------------------------------------------------------------------------------------------------------------------------------------------------------------------------------------------------------------------------------------------------|----|-----|---------------------------------------------------------------------------------------------------------------------------------------|
|                       |            | carried out (minimum duration 20 min.). The women would have been taken directly to the operating theatre where an obstetrician would decide on the further action.                                                                                                                                                                                                                         |    |     | for emergency transfer from FMUs.<br>Apgar score 10/1, 10/5. Infant and mother discharged well                                        |
| <b>Obstetric Unit</b> |            |                                                                                                                                                                                                                                                                                                                                                                                             |    |     |                                                                                                                                       |
| Case 9                | <b>4/5</b> | Multipara<br>OU at 10 cm cervical dilatation, fast labour. No CTG.<br>Meconium-stained amniotic fluid just before spontaneous vaginal birth                                                                                                                                                                                                                                                 | OU | 0.4 | Ventilation, chest compression.<br>Admitted to NICU for 9 hours, CPAP<br>Discharged well                                              |
| Case 10               | <b>6/5</b> | <b>The only case of severe maternal morbidity in the study (also leading to neonatal morbidity).</b><br>Multipara<br>OU at 5 cm cervical dilatation. Epidural, augmentation of labour, continuous CTG. Meconium-stained amniotic fluid, fetal distress leading to caesarean section.<br><b>Uterine rupture</b> discovered. Postpartum haemorrhage >2500 ml. <b>Peripartum hysterectomy.</b> | OU | 5   | Oxygen mask, no ventilation<br><br>Admitted to NICU shortly after birth, hypertonia and respiratory problems. CPAP<br>Discharged well |
| Case 11               | <b>6/5</b> | Primipara<br>OU at 5 cm dilatation. No dilatation for two hours:<br>Augmentation of labour, CTG, meconium-stained fluid.<br>Spinal analgesia (saddle block), followed by short fetal bradycardia. Ventouse delivery 7.5 hours after admission                                                                                                                                               | OU | 4.6 | No ventilation<br>Admitted to NICU shortly after birth for respiratory problems.<br>CPAP, antibiotics<br>Discharged well              |
| Case 12               | <b>6/5</b> | Multipara<br>OU at 5 cm cervical dilatation.<br>Augmentation of labour, meconium-stained labour, continuous CTG, spontaneous vaginal birth                                                                                                                                                                                                                                                  | OU | 3.7 | No ventilation<br>Admitted to NICU, hypertonia and respiratory problems.<br>CPAP, treatment for seizures.<br>Discharged well          |
| Case 13               | <b>6/5</b> | Multipara<br>OU at 10 cm cervical dilatation. No CTG, fast labour, clear amniotic fluid, spontaneous vaginal birth                                                                                                                                                                                                                                                                          | OU | 1.5 | No ventilation<br>Admitted to NICU for respiratory problems CPAP.<br>Discharged well                                                  |

\*Longest NICU stay in study \*\*Second longest NICU stay \*\*\*Third longest NICU stay

STROBE 2007 (v4) Statement—Checklist of items that should be included in reports of *cohort studies*

| Section/Topic                | Item # | Recommendation                                                                                                                                                                       | Reported on page #                             |
|------------------------------|--------|--------------------------------------------------------------------------------------------------------------------------------------------------------------------------------------|------------------------------------------------|
| Title and abstract           | 1      | (a) Indicate the study's design with a commonly used term in the title or the abstract                                                                                               | 2 + 4                                          |
|                              |        | (b) Provide in the abstract an informative and balanced summary of what was done and what was found                                                                                  | 3                                              |
| <b>Introduction</b>          |        |                                                                                                                                                                                      |                                                |
| Background/rationale         | 2      | Explain the scientific background and rationale for the investigation being reported                                                                                                 | 4 + 5                                          |
| Objectives                   | 3      | State specific objectives, including any prespecified hypotheses                                                                                                                     | 5 + (6)                                        |
| <b>Methods</b>               |        |                                                                                                                                                                                      |                                                |
| Study design                 | 4      | Present key elements of study design early in the paper                                                                                                                              | 6                                              |
| Setting                      | 5      | Describe the setting, locations, and relevant dates, including periods of recruitment, exposure, follow-up, and data collection                                                      | 6-8 + supplementary information in table A + B |
| Participants                 | 6      | (a) Give the eligibility criteria, and the sources and methods of selection of participants. Describe methods of follow-up                                                           | 8-9                                            |
|                              |        | (b) For matched studies, give matching criteria and number of exposed and unexposed                                                                                                  | 8-9 + table 1                                  |
| Variables                    | 7      | Clearly define all outcomes, exposures, predictors, potential confounders, and effect modifiers. Give diagnostic criteria, if applicable                                             | 10                                             |
| Data sources/<br>measurement | 8*     | For each variable of interest, give sources of data and details of methods of assessment (measurement). Describe comparability of assessment methods if there is more than one group | 10                                             |
| Bias                         | 9      | Describe any efforts to address potential sources of bias                                                                                                                            | 14-15                                          |
| Study size                   | 10     | Explain how the study size was arrived at                                                                                                                                            | 10-11                                          |
| Quantitative variables       | 11     | Explain how quantitative variables were handled in the analyses. If applicable, describe which groupings were chosen and why                                                         | 10                                             |
| Statistical methods          | 12     | (a) Describe all statistical methods, including those used to control for confounding                                                                                                | 11-12                                          |
|                              |        | (b) Describe any methods used to examine subgroups and interactions                                                                                                                  | 12                                             |
|                              |        | (c) Explain how missing data were addressed                                                                                                                                          |                                                |
|                              |        | (d) If applicable, explain how loss to follow-up was addressed                                                                                                                       | No loss                                        |
|                              |        | (e) Describe any sensitivity analyses                                                                                                                                                |                                                |

|                          |     |                                                                                                                                                                                                              |                                                      |
|--------------------------|-----|--------------------------------------------------------------------------------------------------------------------------------------------------------------------------------------------------------------|------------------------------------------------------|
| <b>Results</b>           |     |                                                                                                                                                                                                              |                                                      |
| Participants             | 13* | (a) Report numbers of individuals at each stage of study—eg numbers potentially eligible, examined for eligibility, confirmed eligible, included in the study, completing follow-up, and analysed            | 12                                                   |
|                          |     | (b) Give reasons for non-participation at each stage                                                                                                                                                         |                                                      |
|                          |     | (c) Consider use of a flow diagram                                                                                                                                                                           | Figure 1                                             |
| Descriptive data         | 14* | (a) Give characteristics of study participants (eg demographic, clinical, social) and information on exposures and potential confounders                                                                     | 12-13 + table 1                                      |
|                          |     | (b) Indicate number of participants with missing data for each variable of interest                                                                                                                          | Table 2 +3                                           |
|                          |     | (c) Summarise follow-up time (eg, average and total amount)                                                                                                                                                  |                                                      |
| Outcome data             | 15* | Report numbers of outcome events or summary measures over time                                                                                                                                               |                                                      |
| Main results             | 16  | (a) Give unadjusted estimates and, if applicable, confounder-adjusted estimates and their precision (eg, 95% confidence interval). Make clear which confounders were adjusted for and why they were included | 13-14 + table 2+3                                    |
|                          |     | (b) Report category boundaries when continuous variables were categorized                                                                                                                                    | 14                                                   |
|                          |     | (c) If relevant, consider translating estimates of relative risk into absolute risk for a meaningful time period                                                                                             |                                                      |
| Other analyses           | 17  | Report other analyses done—eg analyses of subgroups and interactions, and sensitivity analyses                                                                                                               | 14-15 + table 4 + supplementary information, table C |
| <b>Discussion</b>        |     |                                                                                                                                                                                                              |                                                      |
| Key results              | 18  | Summarise key results with reference to study objectives                                                                                                                                                     | 16                                                   |
| <b>Limitations</b>       |     |                                                                                                                                                                                                              |                                                      |
| Interpretation           | 20  | Give a cautious overall interpretation of results considering objectives, limitations, multiplicity of analyses, results from similar studies, and other relevant evidence                                   | 16-19                                                |
| Generalisability         | 21  | Discuss the generalisability (external validity) of the study results                                                                                                                                        | 19-20                                                |
| <b>Other information</b> |     |                                                                                                                                                                                                              |                                                      |
| Funding                  | 22  | Give the source of funding and the role of the funders for the present study and, if applicable, for the original study on which the present article is based                                                | 23                                                   |

\*Give information separately for cases and controls in case-control studies and, if applicable, for exposed and unexposed groups in cohort and cross-sectional studies.

1  
2 **Note:** An Explanation and Elaboration article discusses each checklist item and gives methodological background and published examples of transparent reporting. The STROBE  
3 checklist is best used in conjunction with this article (freely available on the Web sites of PLoS Medicine at <http://www.plosmedicine.org/>, Annals of Internal Medicine at  
4 <http://www.annals.org/>, and Epidemiology at <http://www.epidem.com/>). Information on the STROBE Initiative is available at [www.strobe-statement.org](http://www.strobe-statement.org).  
5  
6  
7  
8  
9  
10  
11  
12  
13  
14  
15  
16  
17  
18  
19  
20  
21  
22  
23  
24  
25  
26  
27  
28  
29  
30  
31  
32  
33  
34  
35  
36  
37  
38  
39  
40  
41  
42  
43  
44  
45  
46  
47

For peer review only

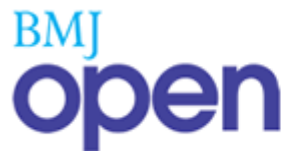

**Freestanding midwifery unit versus obstetric unit: A matched cohort study of outcomes in low-risk women**

|                                 |                                                                                                                                                                                                                                                                                                                                                                                                |
|---------------------------------|------------------------------------------------------------------------------------------------------------------------------------------------------------------------------------------------------------------------------------------------------------------------------------------------------------------------------------------------------------------------------------------------|
| Journal:                        | <i>BMJ Open</i>                                                                                                                                                                                                                                                                                                                                                                                |
| Manuscript ID:                  | bmjopen-2011-000262.R1                                                                                                                                                                                                                                                                                                                                                                         |
| Article Type:                   | Research                                                                                                                                                                                                                                                                                                                                                                                       |
| Date Submitted by the Author:   | 09-Aug-2011                                                                                                                                                                                                                                                                                                                                                                                    |
| Complete List of Authors:       | Overgaard, Charlotte; Aalborg university, Department of sociology and social work<br>Møller, Anna; Aalborg University Hospital<br>Fenger-Grøn, Morten; Aarhus University Hospital, Department of Clinical Epidemiology<br>Knudsen, Lisbeth; Aalborg University, Department of Sociology and Social Work<br>Sandall, Jane; Division of Women's Health, School of Medicine, Kings College London |
| <b>Primary Subject Heading</b>: | Reproductive medicine, obstetrics and gynaecology                                                                                                                                                                                                                                                                                                                                              |
| Keywords:                       | Low risk childbirth, Birth interventions, Perinatal and maternal morbidity, Freestanding midwifery unit, Midwifery care, birth outcomes                                                                                                                                                                                                                                                        |
|                                 |                                                                                                                                                                                                                                                                                                                                                                                                |

SCHOLARONE™  
Manuscripts

only

**Authors:**

Charlotte Overgaard, Anna Margrethe Møller, Morten Fenger-Grøn, Lisbeth B Knudsen, Jane Sandall

Aalborg University, Department of Sociology and Social Work, DK-9220 Aalborg, Charlotte Overgaard, research fellow

Aalborg University Hospital, Reberbansgade, DK-9100 Aalborg, Anna Margrethe Møller, Head of Obstetrics

Department of Clinical Epidemiology, Aarhus University Hospital, DK-8200 Aarhus N and Research Unit for General Practice, Aarhus University, DK-8000 Aarhus C, Morten Fenger-Grøn, medical statistician

Aalborg University, Department of Sociology and Social Work, DK-9220 Aalborg, Lisbeth B Knudsen, Professor of Medical Sociology and Socio-demography

Division of Women's Health, School of Medicine, Kings College London, St. Thomas' Hospital, Westminster Bridge Road, London SE1 7EH, Jane Sandall, Professor of Social Science and Women's Health



**Objective:**

To compare perinatal and maternal morbidity and birth interventions in low-risk women giving birth in two freestanding midwifery units (FMUs) and two obstetric units (OUs).

**Design:**

A cohort study with a matched control group

**Setting:**

The region of North Jutland, Denmark

**Participants:**

839 low-risk women intending FMU birth and a matched control group of 839 low-risk women intending OU birth were included at the start of care in labour. OU women were individually chosen to match selected obstetric/socio-economic characteristics of FMU women. Analysis by intention-to-treat.

**Main outcome measures:**

Perinatal and maternal morbidity and interventions

**Results:**

No significant differences in perinatal morbidity were observed between groups (Apgar scores <7/5, <9/5 or <7/1, admittance to neonatal unit, asphyxia, or readmission). Adverse outcomes were rare, and occurred in both groups.

1  
2  
3  
4 FMU women were significantly less likely to experience abnormal fetal heart rate (RR: 0.3, 95%  
5  
6 CI: 0.2 to 0.5), fetal-pelvic complications (0.2, 0.05 to 0.6), shoulder dystocia (0.3, 0.1 to 0.9),  
7  
8 occipital-posterior presentation (0.5, 0.3 to 0.9), and postpartum haemorrhage >500ml (0.4, 0.3 to  
9  
10 0.6) compared to OU women.  
11  
12

13  
14  
15  
16 Significant reductions were found for FMU group's use of caesarean section (0.6, 0.3 to 0.9),  
17  
18 instrumental delivery (0.4, 0.3 to 0.6), and oxytocin augmentation (0.5, 0.3 to 0.6) and epidural  
19  
20 analgesia (0.4, 0.3 to 0.6).  
21  
22

23  
24  
25  
26 Transfer during or <2 hours after birth occurred in 14.8% of all FMU births but more frequently in  
27  
28 primiparas than in multiparas (36.7% versus 7.2%).  
29  
30

### 31 32 33 **Conclusion**

34  
35 Comparing FMU and OU groups, no increase was found in perinatal morbidity, but significantly  
36  
37 reduced incidences of maternal morbidity, birth interventions including caesarean section, and  
38  
39 increased likelihood of spontaneous vaginal birth. FMU care may be considered as an adequate  
40  
41 alternative to OU care for low-risk women. Pregnant prospective mothers should be given informed  
42  
43 choice of place of birth, including information on transfer.  
44  
45  
46  
47  
48  
49  
50  
51  
52  
53  
54  
55  
56  
57  
58  
59  
60

1  
2  
3  
4 **Article summary:**  
5

6  
7 Article focus:  
8

- 9
- 10 • The safety of birth in free-standing midwifery units (FMUs) is strongly debated as acute  
11 complications may arise in a spite of careful risk assessment of women.  
12  
13
  - 14 • Prior studies suggest that FMU care for low risk women is related to low perinatal and  
15 maternal morbidity, fewer interventions and a decreased use of medical pain relief compared  
16 to care from obstetric units (OUs) care but some are limited by e.g. the inclusion of high-risk  
17 women, low number of participants, and inadequate control of bias and confounding.  
18  
19
  - 20 • The present study aim to compare perinatal and maternal morbidity, birth interventions, and  
21 pain relief in low-risk women giving birth in two freestanding midwifery-led units and two  
22 obstetric units (OUs) in Denmark.  
23  
24  
25  
26  
27  
28  
29  
30  
31  
32  
33  
34

35  
36  
37  
38 Key messages:  
39

- 40
- 41 • No difference in perinatal morbidity was found among infants of low-risk women who  
42 intended birth in an FMU compared to infants of low-risk women who intended birth in an  
43 OU. More studies on rare adverse outcomes are needed.  
44  
45  
46  
47  
48  
49
  - 50 • FMU care had important benefits such as reduced maternal morbidity, reduced use of birth  
51 interventions including caesarean sections and increased likelihood of spontaneous vaginal  
52 birth compared to OU care. However 37% of primiparas and 7% of multiparas transferred  
53 during or <2 hours after birth.  
54  
55  
56  
57  
58  
59  
60

- 1  
2  
3  
4  
5  
6  
7  
8  
9  
10  
11  
12  
13  
14  
15
- Care in FMUs may be considered as an adequate alternative to OU care for low-risk women, and women should be given an informed choice of place of birth, including information on transfer.

16  
17  
18

#### Strengths and limitations of this study

- 19  
20  
21  
22  
23  
24  
25  
26  
27  
28  
29  
30  
31  
32  
33  
34  
35  
36  
37  
38  
39  
40  
41  
42  
43  
44  
45  
46  
47  
48  
49  
50  
51  
52  
53  
54  
55  
56  
57  
58  
59  
60
- The study compares processes and outcomes from women who have been rigorously and prospectively judged to be at low obstetric risk in two well-defined and carefully established settings in the same region.
  - Data are complete as all eligible women planning to give birth in the FMU settings were included, and full follow-up on all participants was obtained.
  - Although the study groups were matched and adjustment for the matching factors revealed no residual confounding, the risk of confounding by unknown factors related to women's choice of care in labour persists.

## Freestanding midwifery unit versus obstetric unit:

### A matched cohort study of outcomes in low-risk women

#### Introduction

In most industrialised countries, obstetric units (OU) have become the primary setting for birth with the safety of other birth settings strongly debated<sup>1-5</sup>. The primary concern regarding birth outside an OU relates to the anticipation of adverse perinatal outcomes. But steadily increasing birth intervention rates and studies of women's perceptions of childbirth indicate that OUs may not always provide optimal conditions for low-risk childbirth or satisfy women's individual needs<sup>6-14</sup>. In many countries the introduction of midwifery units<sup>1</sup> has given women more choice of place of birth.

A Cochrane review concerning alongside midwifery units (AMU) found no significant differences in perinatal mortality or perinatal and maternal morbidity. It also documented significantly fewer medical interventions and increased maternal satisfaction<sup>12</sup>. However, this evidence cannot be generalised to freestanding midwifery units (FMU). Concern has been expressed that acute intrapartum and postpartum complications may arise in spite of careful assessment of low-risk women and that transfer delays may affect lifesaving medical interventions such as caesarean section or advanced neonatal resuscitation.

Two prospective, controlled cohort studies of FMUs<sup>16;17</sup> both report low perinatal and maternal morbidity, fewer interventions and decreased use of medical pain relief. The results are supported by a wide range of retrospective, uncontrolled and/or population-based studies<sup>6;10;18-30</sup>. But the

---

<sup>1</sup> A midwifery unit is a clinical location offering care to women with straightforward pregnancies during labour and birth in which midwives take primary professional responsibility for care. It may be in the site of a hospital with an obstetric unit, hence termed an "alongside" midwifery unit (AMU) or be a physically separated, freestanding unit (FMU) where obstetric, neonatal and anaesthetic care requires ambulance transfer<sup>15</sup>.

1  
2  
3  
4 evidence is conflicting as two of these studies found significantly lower 1-minute Apgar scores<sup>28</sup>  
5  
6 and increased need for neonatal ventilation<sup>10</sup> in FMUs. Because of greatly varying criteria for low-  
7  
8 risk categorisation, care standards, midwives' training, cooperation between FMUs and OUs, etc.,  
9  
10 considerable caution must be observed when generalising findings to other settings and countries.  
11  
12 Furthermore, the level of evidence was weak<sup>31</sup>. The applicability/validity of many studies is limited  
13  
14 by factors such as small sample size, inclusion of high-risk women, limited control of bias and  
15  
16 confounding, and inadequate descriptions of inclusion and exclusion criteria, medical assistance (if  
17  
18 any), and transfer criteria.  
19  
20  
21  
22  
23  
24  
25

26 There is a need for further research, but the rarity of adverse outcomes in a low-risk population, the  
27  
28 limited number of FMU births, and women's strong preference for choice of birthplace<sup>32;33</sup>  
29  
30 converge to form serious barriers for the investigation of perinatal mortality in large, adequately  
31  
32 powered, randomised controlled trials (RCTs). This increases the need for evidence from carefully  
33  
34 planned cohort studies.  
35  
36  
37  
38  
39

## 40 Objectives

41  
42 The present study compared labouring processes, perinatal and maternal morbidity and birth  
43  
44 interventions in low-risk women intending to give birth in two FMUs and two OUs in Denmark.  
45  
46 The study is reported in accordance with STROBE requirements<sup>34;35</sup>.  
47  
48  
49  
50

## 51 Study hypotheses

52  
53 On basis on of previous research, we hypothesised that FMU care, with its emphasis on the  
54  
55 physiological birth process and psycho-social well-being during childbirth, would entail a number  
56  
57 of positive effects for the women, such as a higher rate of spontaneous vaginal birth, intact  
58  
59  
60

1  
2  
3  
4 perineum, and use of non-pharmacological pain relief. FMU women were hypothesised to  
5  
6 experience fewer interventions (including caesarean section) and require less use of  
7  
8 pharmacological pain relief compared to OU women. No differences in perinatal or maternal  
9  
10 morbidity were predicted.  
11  
12

## 13 14 15 16 **Methods**

### 17 18 **Design**

19  
20 A matched cohort study  
21  
22  
23

### 24 25 **Setting**

26  
27 The study was conducted in North Jutland, a relatively sparsely populated region of Denmark where  
28  
29 the local health authorities in 2001 had decided to transform two of the region's four maternity units  
30  
31 into FMUs, opening in 2001 and 2004. The FMUs offered midwifery-led care during pregnancy and  
32  
33 intrapartum and postnatal periods to low-risk women.  
34  
35  
36  
37  
38

### 39 40 **Data collection**

41  
42 In a 3.5-year period between 2004 and 2008, data on socio-demographic factors, previous  
43  
44 pregnancies and births, current pregnancy and birth, infants, FMU transfers, and maternal/neonatal  
45  
46 readmissions 0-28 days postpartum were collected from patient records and the North Jutland  
47  
48 Patient Administration System. The data collection was carried out by project staff with  
49  
50 comprehensive professional knowledge of the field on basis of written instructions.  
51  
52  
53

### 54 55 56 **Data security and ethics** 57 58 59 60

1  
2  
3  
4 The project was approved by the Danish Data Protection Agency (reference number: 2005-41-5352)  
5  
6 and the regional health authorities of North Jutland. Data were handled in strict confidentiality and  
7  
8 in accordance with Danish law requiring neither approval from an ethics committee nor informed  
9  
10 consent from patients for observational studies involving no risk or inconvenience to patients<sup>36</sup>.  
11  
12  
13

### 16 **Characteristics of the freestanding midwifery units**

17  
18 In Denmark care for low-risk women is midwifery-led in all birth settings. Both FMUs were located  
19  
20 in community hospitals with an intensive care unit but without an obstetric service. The annual  
21  
22 number of births in the FMUs were approximately 170 (Hobro) and 130 (Frederikshavn). Women  
23  
24 transferred to OUs by ambulance using multidisciplinary regional criteria and continued care with  
25  
26 an FMU or OU midwife under the supervision of an obstetrician. FMU midwives had at least two  
27  
28 years experience and training in obstetric emergencies, including ventouse delivery. FMU midwives  
29  
30 provided antenatal care and out-of-hours post-partum care for all women in the area booked for  
31  
32 both OU and FMU birth. FMU midwives also assisted at the nearest OU, if FMU not busy, and had  
33  
34 40-70 births a year. Additional contextual information is available in Table A.  
35  
36  
37  
38  
39  
40  
41

### 42 **Web only information: Table A: Characteristics of FMUs**

### 48 **Characteristics of the obstetric maternity units**

49  
50 Aalborg University Hospital is a one of five highly specialised Danish hospitals with a specialist  
51  
52 OU who saw approximately 3500 births a year. Vendsyssel Hospital is a provincial hospital with 10  
53  
54 clinical specialities, including an OU providing care for low-risk and most high-risk pregnancies  
55  
56 and a generalised paediatric ward. The annual number of births was approximately 1400. Mothers  
57  
58  
59  
60



1  
2  
3  
4 and infants with severe illness were transferred to Aalborg University Hospital or one of the other  
5  
6  
7 four, highly specialised hospitals in Denmark, depending on the condition.  
8  
9

## 10 11 **Web only information: Table B: Characteristics of OUs**

### 12

### 13 14 15 16 **Participants**

17  
18 The study population was composed of an intervention group of 839 low-risk women from two  
19  
20 freestanding midwifery units in Hobro and Frederikshavn, and a control group of 839 low-risk  
21  
22 women, matched for key factors, who received routine care from the specialist obstetric unit at  
23  
24 Aalborg University Hospital and the obstetric unit at Vendsyssel Hospital, Hjørring.  
25  
26  
27

### 28 29 30 **Inclusion criteria**

31  
32 All labouring women admitted to the FMUs by their midwives on the basis of multi-disciplinary,  
33  
34 regional admission criteria were included in the study. As informed consent of participation was not  
35  
36 required due to Danish legislation, all eligible women were included.  
37  
38  
39

40  
41  
42 Women in the control group were eligible for inclusion only if they represented an individual match  
43  
44 to the obstetric and social characteristics of a woman in the FMU group.  
45  
46  
47

48  
49 Women in both study groups were thus rigorously judged to be at low-risk and fulfil criteria for  
50  
51 FMU birth, and included at the start of care in labour.  
52  
53  
54

### 55 56 **Exclusion criteria**

57  
58  
59  
60

1  
2  
3  
4  
5  
6  
7  
8  
9  
10  
11  
12  
13  
14  
15  
16  
17  
18  
19  
20  
21  
22  
23  
24  
25  
26  
27  
28  
29  
30  
31  
32  
33  
34  
35  
36  
37  
38  
39  
40  
41  
42  
43  
44  
45  
46  
47  
48  
49  
50  
51  
52  
53  
54  
55  
56  
57  
58  
59  
60

Excluded from the study were three women admitted to an FMU for emergency treatment without satisfying the criteria for FMU care; an event occurring very rarely.

### **The matching process**

Confounding is a main concern in cohort studies. The matched design was chosen because it potentially increases the statistical precision in a cohort study and effectively eliminates the association between the exposure (place of birth) and the matching variables, given a perfect balance of data is obtained on matched variables between groups<sup>34;37;38</sup>. Matching is especially relevant in situations with non-linearity and inter-correlation between variables or where a substantial difference in the distribution of confounders between groups is expected<sup>39</sup>. This was the case in present study whose participants were recruited from areas characterised by varying degrees of urbanisation and heterogeneity in socio-demographic characteristics<sup>40;41</sup>.

Women in the control group were selected from the region's patient administration system which carries detailed information on the region's pregnant women. For each participant included in the FMU group, a control participant from the nearest OU was identified among the admitted low-risk women. The selection of matched control participants was conducted in accordance to strict guidelines by project staff that were blinded to the identity and the birth outcomes of women in the FMU group. The matching result was blinded until the selected control participants had given birth.

Matching was done prospectively on criteria with an established influence on birth outcomes<sup>42-45</sup>: low risk status, parity, smoking, BMI, age, ethnicity, education, occupation, and cohabitation status.

A 100% match was carried out on: low-risk status, parity and smoking status. Body Mass Index (BMI) and age were matched with a range of +/-5; meaning that BMI/age scores of 22 were

1  
2  
3  
4 matchable with scores between 17 and 27. Socio-demographic characteristics such as ethnicity,  
5  
6 education level, occupation, and cohabitation status were matched within groups as shown in Table  
7  
8  
9 1.

### 14 **Definition of low risk**

16 Women were judged to be at low risk if they were healthy, presented in spontaneous labour  
17  
18 between 37+0 and 41+6 days of gestation, had an uncomplicated pregnancy and no  
19  
20 medical/obstetric history or conditions increasing obstetric risk as outlined in the UK NICE  
21  
22 intrapartum care guidelines<sup>46</sup>. However, we considered healthy multiparous women as low-risk  
23  
24 regardless of their age and BMI if their previous pregnancies and deliveries had been  
25  
26  
27  
28 uncomplicated.  
29  
30  
31  
32

### 33 **Variables and data measurement**

34  
35 The primary outcomes were: Apgar score <7/5 minutes, and caesarean section.

37  
38 Secondary outcomes were the following: Infant: Apgar score <9/5 minutes, <7/1 minutes; neonatal  
39  
40 asphyxia; admittance to neonatal intensive care unit (NICU); admittance to NICU >48 hours;  
41  
42 neonatal readmission 0-28 days postpartum. Maternal: spontaneous vaginal birth; intact perineum;  
43  
44 epidural analgesia; use of water tub for pain relief; abnormal fetal heart rate leading to action;  
45  
46 dystocia; shoulder dystocia; instrumental vaginal delivery; postpartum haemorrhage >500 ml; 1<sup>st</sup>-  
47  
48 2<sup>nd</sup> degree tear; 3<sup>rd</sup>/4<sup>th</sup> degree tear; maternal re-admission 0-28 days postpartum. These outcomes  
49  
50 were, along with a range of additional outcomes, defined prior to the initiation of the study, and  
51  
52 reported as well as all cases of perinatal mortality and severe perinatal and maternal morbidity.  
53  
54  
55  
56 Unfortunately, data on umbilical blood gas was not obtainable.  
57  
58  
59  
60

1  
2  
3  
4 Intended birthplace at the start of care in labour was considered the exposure. The study did not aim  
5  
6 to examine differences in maternal or perinatal mortality since their low occurrence in the Danish low  
7  
8 risk population (0.065‰ and 3‰, respectively) would require an extremely large and therefore  
9  
10 unrealistic number of participants.  
11  
12

13  
14  
15  
16 The data were recorded in accordance with the National Birth Register and the North Jutland Birth  
17  
18 Register, standards and guidelines applying to all four units and with which all midwives and  
19  
20 doctors in the region were familiar. A stop watch was used when measuring Apgar scores.  
21  
22

23 Postpartum haemorrhage was routinely estimated rather than measured.  
24  
25  
26  
27

### 28 **Power calculation, sample size and changes in study protocol**

29

30 Clinically important differences were defined and power calculations performed for all the above-  
31  
32 mentioned clinical endpoints. The frequencies used in the calculations originate in the North Jutland  
33  
34 Birth Register and the international literature. Estimations of sample sizes were based on power  
35  
36 calculation for the primary outcomes: Apgar score <7/5 minute and caesarean section. The limited  
37  
38 number of FMU births, at 300-350 per year, was also taken into account. The study was originally  
39  
40 planned to include data on 1027 FMU participants and 1027 control participants over a period of  
41  
42 3.5 years, starting 1st January 2005, however, in October 2006 the local authorities unexpectedly  
43  
44 announced the closure of its two FMUs. The National Board of Health expressed concern that the  
45  
46 local authorities had introduced a new model of care that had not been subjected to adequate  
47  
48 evaluation. The power to detect differences between our two study groups was consequently  
49  
50 reduced and a thorough revision of the study protocol was required. At the time of the FMU  
51  
52 closures in date, 550 FMU participants had been included, and in order to obtain the largest possible  
53  
54 sample of FMU participants, we included all of the 289 eligible women who had been admitted to  
55  
56  
57  
58  
59  
60

1  
2  
3  
4 the FMUs since the opening of the second FMU (1 March 2004). These women were prospectively  
5  
6 matched with women from the nearest OU, thus ensuring total samples of 839 women in each  
7  
8  
9 group.

10  
11 After the FMU closures, power calculations were re-run. The results showed that with a sample of  
12  
13 839 women in each group, the study sustained the power to detect clinically relevant differences  
14  
15 between groups on all primary and secondary outcomes. For the two primary outcomes, the revised  
16  
17 sample provided power (5% significance level, 80% power) to detect an increase in Apgar score  
18  
19 <7/5 minutes from expected 1.07% in the OU group to 3.1% in the FMU group and a reduction in  
20  
21 the incidence rate of caesarean section from 8.8% in the OU group to 5.5% in the FMU group.  
22  
23  
24  
25  
26  
27

### 28 **Statistical analysis of data**

29  
30 Analyses were based on the intention-to-treat principle and carried out by use of STATA software,  
31  
32 version 11.  
33  
34

35  
36 The two groups (matched 1:1) were compared by paired tests on all measures, McNemar's test for  
37  
38 paired binary data (medical data on the birth process) and Wilcoxon's signed-rank test for paired  
39  
40 continuous data (e.g. birth weight). As we were concerned that residual confounding might remain,  
41  
42 supplementary regression analysis adjusting for the matching characteristics was performed by use  
43  
44 of both continuous and grouped variables<sup>47,48</sup>. For ease of interpretation (e.g. calculation of  
45  
46 confidence bands), ordinal outcomes were dichotomized, but we controlled for conclusive  
47  
48 agreement with test results based on the original data.  
49  
50  
51  
52

53  
54 The analysis for occipital posterior position was performed after excluding caesarean deliveries. For  
55  
56 all comparisons, relative risks with 95% confidence intervals were calculated. All reported P-values  
57  
58 were two-sided, and the level of statistical significance 5%. To check for bias introduced by the  
59  
60

1  
2  
3  
4 inclusion of FMU women giving birth in 2004, supplementary sub-group analyses were performed  
5  
6 on 2004-data and main data, respectively.  
7  
8  
9

## 10 11 **Participants**

12  
13 A low-risk match was prospectively identified for all 839 women admitted to an FMU and full  
14  
15 follow-up was obtained for all 1678 women. Of the 839 FMU women, 733 (87.4%) gave birth as  
16  
17 planned in the FMU or at home, assisted by a FMU midwife (cf. Figure 1). Transit births were  
18  
19 included in the few cases where the woman had consulted a midwife <24 hours before giving birth  
20  
21 and had been advised to stay at home longer/return to her home.  
22  
23  
24  
25

26  
27  
28 Ninety-seven FMU women (11.6%) were transferred intrapartum, among these two gave birth in  
29  
30 the ambulance. Eleven, who were in early labour, were transported in their own vehicle. Twenty-  
31  
32 seven transfers (3.2%) took place <2 hours after birth, another thirteen (1.5%) during the postnatal  
33  
34 stay. The total number of transfers was 137 (16.4%).  
35  
36  
37  
38  
39

## 40 **Figure 1: Flow chart**

41  
42  
43  
44 As shown in Table 1, the matching produced two fully comparable groups in terms of key medical  
45  
46 and socio-demographic factors. The FMU women's background details reflected the life conditions  
47  
48 of the local population in general<sup>40;49</sup>. With Aalborg and Hjørring municipalities as exceptions, the  
49  
50 educational and income levels in North Jutland rank as the lowest in Denmark. In the FMUs'  
51  
52 predominantly rural catchment areas, unemployment rates are high, which is reflected in a slightly  
53  
54 higher rate of FMU women without employment outside the home.  
55  
56  
57  
58  
59  
60

## **Main results**

### Primary outcomes

No statistically significant differences between the two study groups in the rate of infants with an Apgar score <7/5 was found (relative risk (RR):1; 95% confidence interval (CI):0.3-3.4). The use of caesarean section (0.6, 0.3 to 0.9) was significantly reduced among FMU women compared to OU women (See Table 2).

### Table 2 on outcomes

### Secondary perinatal outcomes

No significant differences were found in perinatal outcome such as Apgar score <7/1 at 1 minute and < 9 at 5 minutes; neonatal asphyxia; neonatal admittance to NICU; neonatal stay in NICU >48 hours or neonatal readmission to hospital 0-28 days postpartum (See Table 2).

One infant was delivered by caesarean section due to umbilical cord prolapse in the hospital where an FMU was co-located. As a result, sensitivity analysis was conducted on the hypothesis that had the women been transferred, the infant would have had an Apgar score <7/5 minutes. Analysis showed no difference between groups (1.25;0.3 to 4.6) and did not affect overall findings. Full case details are given in Table C on adverse outcomes.

### Secondary maternal outcomes

As shown in Table 2, compared to OU women, FMU women were significantly less likely to experience: abnormal fetal heart rate leading to action (0.3, 0.2 to 0.5); dystocia in labour (0.4, 0.3 to 0.5); intrapartum fetal-pelvic complications (0.2, 0.05 to 0.6); shoulder dystocia (0.3, 0.1 to 0.9);

1  
2  
3  
4 occipital posterior presentation at birth (0.5, 0.3 to 0.9); postpartum haemorrhage >500ml (0.4, 0.3  
5  
6 to 0.7) and 1<sup>st</sup>/2<sup>nd</sup> degree tear (0.9, 0.8 to 0.97).  
7  
8  
9

10  
11 Moreover compared to OU women, FMU women were significantly more likely to experience:  
12  
13 intact perineum (1.1, 1.02 to 1.2) and discharge <6 hours postpartum (0.6, 0.5-0.7).  
14  
15

16  
17  
18 No significant differences were found in meconium-stained amniotic fluid; postpartum  
19  
20 haemorrhage > 1000 ml; 3rd and 4th degree tear; maternal re-admission/outpatient visit 0-28 days  
21  
22 postpartum and severe maternal morbidity.  
23  
24  
25

26  
27  
28 Neither was infant birth weight (mean: 3.636 kg (FMU) and 3.641 kg (OU)), cervical dilatation on  
29  
30 admission (mean: 4.4 cm (FMU) and 4.3 cm (OU)), or duration of admission for labour care (mean:  
31  
32 5.3 hours (FMU) and 5.6 hours (OU)) different between the two study groups.  
33  
34  
35

### 36 37 **Birth interventions**

38  
39  
40 As shown in Table 3, compared to OU women, FMU women were significantly less likely to  
41  
42 experience: instrumental delivery (0.4, 0.3 to 0.6); oxytocin augmentation in labour (0.5, 0.3 to  
43  
44 0.6), treatment for shoulder dystocia (0.1, 0.01 to 0.8), perineal suturing (0.8, 0.7 to 0.9),  
45  
46 intrauterine palpation (0.3, 0.1 to 0.9) and epidural analgesia (0.4, 0.3 to 0.6).  
47  
48  
49  
50

51  
52  
53 Moreover, compared to OU women, FMU women were significantly more likely to experience  
54  
55 spontaneous vaginal birth (1.06, 1.03 to 1.09), and use of water tub for pain relief (1.4, 1.2 to 1.6).  
56  
57  
58  
59  
60



1  
2  
3  
4 No significant differences between groups were found for one or more uterotonics, and non-  
5  
6  
7 recumbent position for birth.  
8  
9

### 10 11 **Table 3 on interventions and pain relief** 12 13

#### 14 15 16 **Other analyses** 17

18 A regression analysis adjusting for the matching characteristics showed coinciding results with the  
19  
20  
21 match analysis, thus confirming the robustness of our results and matching. A sub-group analysis  
22  
23  
24 comparing the late collected data on 2004-FMU participants with the main, prospectively collected  
25  
26 data detected no systematic differences or deviation of results between the two bodies of data.  
27  
28  
29

#### 30 31 **Transfer** 32

33 All reasons for transfer are tabulated in Table 4. Overall intrapartum transfer rates (up to 2 hours  
34  
35 post partum) were 14.8% but different for primiparous and multiparous women (36.7 versus 7.2%)  
36  
37  
38 The most common reason for transfer for all women was slow progress of labour. Ambulance  
39  
40 transfers from the two FMUs averaged 42/38 minutes (range: 20 to 60).  
41  
42  
43

44 After transfer, women had shared care between an obstetrician and a midwife, and thirty-six percent  
45  
46  
47 of transferred women continued to be cared for by the FMU midwife under supervision of an  
48  
49  
50 obstetrician.  
51  
52

### 53 **Table 4: Causes of FMU-OU transfers** 54 55

56  
57 Adverse outcomes were defined as severe maternal morbidity, perinatal mortality, Apgar score <7/5  
58  
59  
60 minutes, and >1 week NICU admittance. One incident of severe maternal morbidity (uterine

1  
2  
3  
4 rupture) occurred among the OU women. In the FMU group, one perinatal/neonatal death occurred  
5  
6 due to an undetected, severe congenital malformation. Nine infants were born with 5 minute Apgar  
7  
8 scores of 4-6; three belonged to the FMU group but were born in an OU following intrapartum  
9  
10 transferral. Eight of the nine infants were admitted to NICU; all were later discharged well.  
11  
12  
13

14  
15  
16 Three infants from the FMU group, who were born in an OU after transfer, had NICU stays  
17  
18 exceeding one week. One infant with a 5/5 Apgar score had a stay of 36 days, but this was due  
19  
20 primarily to an undetected congenital heart disease.  
21  
22  
23

24  
25  
26 One adverse perinatal event was dealt with in a FMU shortly after its opening. Due to an umbilical  
27  
28 cord prolapse, emergency caesarean section was carried out by a gynaecologist, employed at the  
29  
30 unit before its transformation into a FMU and summoned against protocol. Apgar scores were 10/1,  
31  
32 10/5. Supplementary information on all adverse events is provided in Table C  
33  
34  
35

## 36 37 **Discussion**

### 38 39 **Key results**

40  
41  
42 This study was powered to compare two primary maternal and infant outcomes for women at low  
43  
44 risk who intended to give birth in FMU or OU settings. We found no significant differences in  
45  
46 Apgar score <7/5 minutes, and women in the FMU group were less likely to experience caesarean  
47  
48 section.  
49  
50  
51

52  
53  
54 Looking at secondary outcomes, there were no significant differences between Apgar scores <9/5,  
55  
56 <7/1 minutes; total number of NICU admittances; NICU admittance >48 hours; neonatal asphyxia;  
57  
58 or neonatal readmission to hospital. Among this population of low-risk women, women in the FMU  
59  
60

1  
2  
3  
4 group compared to the OU group were significantly less likely to experience dystocia, intrapartum  
5 fetal-pelvic complications, occipital-posterior position of the infant at birth, shoulder dystocia,  
6  
7  
8 oxytocin augmentation, instrumental delivery, and post-partum haemorrhage >500 ml . Moreover,  
9  
10  
11 women in the FMU group were significantly more likely to experience spontaneous vaginal birth  
12  
13 and intact perineum.  
14  
15  
16  
17

### 18 **Limitations**

19  
20 The limitations of our study stem partly from its observational design, partly from the sudden  
21  
22 closure of the two FMUs. A non-randomised study design precludes elimination of all potential  
23  
24 confounding factors; only known confounders can be adjusted for, and only as far as they can be  
25  
26 accurately measured. Despite of our close matching of study groups and adjustment for matching  
27  
28 factors, residual confounding and confounding by unknown factors related to women's choice of  
29  
30 care in labour may persist. Neither can any bias linked to the delayed data collection for 289 FMU  
31  
32 participants from 2004 be ruled out, but we were somewhat reassured to find that the 2004 data  
33  
34 were in conformity with the later data. Our contention that such a risk is limited is also supported by  
35  
36 the fact that no interventions were performed in the study, participants were included on the same  
37  
38 principles, individual and project-specific data collections were performed for all participants,  
39  
40 patient records were of good quality, and all control participants were prospectively included. The  
41  
42 obstetric quality indicators, which were compiled annually by the units, were closely followed to  
43  
44 detect any changes in practices or technology use; no systematic changes occurred during the study  
45  
46 period. No new technology was introduced, nor were any major change in obstetrical practices  
47  
48 implemented.  
49  
50  
51  
52  
53  
54  
55  
56  
57  
58  
59  
60

1  
2  
3  
4 Furthermore, some outcomes (Apgar scores, postpartum haemorrhage) were exposed to  
5  
6 measurement subjectivity, others were proxies for morbidity, although globally used quality  
7  
8 indicators/research outcomes, and the number of events in some analyses was low. It is also  
9  
10 uncertain whether the outcomes would have been different for the two FMU infants had 1) a  
11  
12 caesarean section not been performed and 2) the infant with severe congenital malformation been  
13  
14 born in the alternative setting. Ideally, the results should be confirmed (or refuted) in a large RCT,  
15  
16 but as the recruitment of an adequately large number of women willing to be randomised to place of  
17  
18 birth would be logistically challenging, the most robust design seems to be a large prospective  
19  
20 cohort study.  
21  
22  
23  
24  
25  
26  
27

### 28 **Strengths**

29  
30 We present findings from the second-largest prospectively controlled study of FMU care so far. A  
31  
32 major strength of our study is that it compares processes and outcomes from women who have been  
33  
34 prospectively judged to be at low obstetric risk in two well-defined and carefully established  
35  
36 settings in the same region and that care for women in both groups is provided by midwives. Also,  
37  
38 in contrary to some earlier studies<sup>10;16;29</sup>, the data are complete as all eligible women planning to  
39  
40 give birth in the FMU settings were included, and full follow-up on all participants was obtained.  
41  
42  
43  
44  
45  
46

### 47 **Interpretation**

48  
49 We found no difference in perinatal morbidity between groups and our results agree with the results  
50  
51 of most studies of FMU versus OU care<sup>6;11;18-30</sup>. Although women were transferred to the OU  
52  
53 without delay (3-23 hours before giving birth), it is a concern that the three NICU stays exceeding  
54  
55 one week occurred in the FMU group. Further study of rare adverse outcomes and optimisation of  
56  
57 care for transferred women are needed.  
58  
59  
60

1  
2  
3  
4  
5  
6  
7 The study findings also agree with other studies of FMU care<sup>6;10;18;24;26;28;29</sup> that have all reported a  
8  
9 reduced incidence of birth interventions while the caesarean section rate is seldom found to be  
10  
11 affected, something which may stem from inadequacies in the power or robustness of their design.  
12  
13 In this respect, our study forms an important exception in finding a significant reduction in  
14  
15 caesarean section in women in the FMU group. In addition, the present study is the first to report  
16  
17 that FMU women were significantly less likely to experience fetal-pelvic complications, occipital-  
18  
19 posterior position of the infant at birth and shoulder dystocia compared to OU women.  
20  
21  
22  
23  
24  
25

26 FMU care is a complex intervention and although the study does not enable us to be specific about  
27  
28 the individual mechanisms or elements of FMU care leading to decreases in the incidence of birth  
29  
30 complications and birth interventions, including caesarean section, we would indicate as influencing  
31  
32 factors the greater availability of continuous support during labour, the encouragement of women to  
33  
34 ambulate and use different position during labour, and the spacious and calm FMU facilities.  
35  
36

37 Continuous support during labour has been proved to reduce birth interventions and the need for  
38  
39 pharmaceutical pain relief<sup>50</sup>. Mobilisation and the practice of hand-knee position have furthermore  
40  
41 been shown to support fetal rotation into an occipital anterior position and to reduce the duration of  
42  
43 labour<sup>51;52</sup>. In contrast, the use of epidural analgesia and oxytocin augmentation in OU care both  
44  
45 require CTG monitoring and are likely to restrict mobility<sup>53</sup> and thus use of different labour  
46  
47 positions. Furthermore, oxytocin augmentation can cause uterine hyper-stimulation leading to fetal  
48  
49 heart rate abnormality and oxygen desaturation<sup>54</sup>.  
50  
51  
52  
53  
54  
55

56 The overall rate of transfers intrapartum and <2hours after birth at 14.8 % is comparable<sup>18</sup> or  
57  
58 slightly lower than found in some studies of FMU care<sup>21;22;24;26</sup> (18-24%), though one study<sup>6</sup>  
59  
60

1  
2  
3  
4 reported a slightly lower rate of 12%. Few studies report transfer rates for primiparas and multiparas  
5  
6 separately, but a large American study also finds a transfer rate of 7% for multiparas but a lower  
7  
8 rate of 29% for primiparas<sup>24</sup>. In all studies, slow progress of labour was one of the most common  
9  
10 reasons for transfer, depending on the strictness of transfer guidelines. These findings provide  
11  
12 information upon which women, professionals and policy makers can make decisions. However,  
13  
14 these will vary depending upon individual preferences and trade-offs.  
15  
16  
17  
18  
19  
20

21 We suggest that the assessment of the risk of rare adverse outcomes in low-risk FMU births be  
22  
23 balanced against our findings that infant morbidity was not affected and women intending to give  
24  
25 birth in a FMU are less likely to suffer complications or undergo caesarean section and other birth  
26  
27 interventions when compared to women intending to give birth in an OU.  
28  
29  
30  
31  
32

### 33 **Generalisability**

34  
35 Data was collected between 2004 and 2006, but there has been no change in the background  
36  
37 characteristics of participants at that time compared to latest national data in Denmark<sup>41;56</sup>.

38  
39 Any generalisation of our findings must consider the full public funding of all maternity services in  
40  
41 Denmark. The FMU midwives were skilled in dealing with obstetric emergencies, cooperation  
42  
43 between FMUs and OUs was excellent, and the local implementation of multi-disciplinary  
44  
45 guidelines for referral and transfer were based on the best evidence available, thus improving the  
46  
47 reliability of care provided. Furthermore, the FMUs were located in community hospitals that  
48  
49 offered life-supporting assistance in emergencies. Generalising to other countries offering different  
50  
51 conditions should be made with caution.  
52  
53  
54  
55  
56  
57  
58  
59  
60

1  
2  
3  
4 Compared to most other countries, Denmark is culturally less diverse and characterised by less  
5  
6 social inequality, with high standards of health and one of the lowest perinatal mortality rates in the  
7  
8 world (6.6 per 1000 in 2004)<sup>55</sup>. However, the FMU women in this study had higher-than-average  
9  
10 BMIs and lower educational and occupational status than Danish women in general<sup>49;56</sup>,  
11  
12 characteristics that reflect the life conditions and health status of women in the FMUs' peripheral  
13  
14 catchment area. We take this as an indication that positive outcomes for women choosing FMU care  
15  
16 are not necessarily restricted to women privileged by high socio-economic status or excellent  
17  
18 health, an assumption that is in line with the findings of the so far largest study of FMU care<sup>16</sup>.  
19  
20  
21  
22  
23  
24  
25

26 The distances between the four units studied were 35-55 kilometres; FMU and OU care was thus  
27  
28 not equally accessible to all women. Taking into account the characteristics of women in the study  
29  
30 and the finding of convenience/proximity as the most important factor in North Jutland women's  
31  
32 choice of birthplace<sup>57</sup>, we hypothesise that philosophies/ideas about childbirth play a minor role in  
33  
34 our study in comparison to studies involving women whose choices are not affected by geography.  
35  
36  
37  
38  
39

40 Further work should examine the potential influence of birth expectations and perceptions on  
41  
42 women's choice between FMU and OU care to determine any impact of world-views or  
43  
44 philosophies on birth outcomes. Additional aims would be to elucidate the underlying elements of  
45  
46 FMU care and their influence on outcomes and to explore the potential differences between AMU  
47  
48 care and FMU care. Operational efficiency, cost-effectiveness and rare outcomes also present areas  
49  
50 for further work, the latter through a rigorous review of controlled studies of FMU.  
51  
52  
53  
54  
55

## 56 **Conclusion**

57  
58  
59  
60

1  
2  
3  
4 In conclusion, the present study found no increase in perinatal morbidity among infants of low-risk  
5  
6 women intending to give birth in an FMU compared to infants of women intending to give birth in  
7  
8 an OU. Among the FMU women it found reduced maternal morbidity, fewer caesarean sections and  
9  
10 other birth interventions, along with an increased likelihood of spontaneous vaginal birth. Further  
11  
12 study of rare adverse outcomes is needed.  
13  
14  
15  
16  
17

18  
19 Care in FMUs may be considered an adequate alternative to OU care for low-risk women within a  
20  
21 network of supporting OUs. Pregnant women should thus be given an informed basis for their  
22  
23 choice of birthing place, with information on key maternal and infant outcomes and transfer rates  
24  
25 for multiparous and primiparous women. FMU care seems to offer important lessons that should  
26  
27 also be brought to bear on the development of OU care for low-risk women.  
28  
29  
30  
31  
32

### 33 **Contributors**

34  
35  
36 Charlotte Overgaard is responsible for the study's conceptual design, designed the data collection  
37  
38 tools, monitored all data collection, cleaned the data and participated in the analysis and  
39  
40 interpretation of data. She also drafted the article and wrote the final version. She is guarantor.

41  
42 Anna Margrethe Møller participated in the conceptual design of the study and the interpretation of  
43  
44 data. Morten Fenger-Grøn participated in the analysis of data. Lisbeth B Knudsen and Jane Sandall  
45  
46 participated in the interpretation of data. All of the authors critically revised the manuscript for  
47  
48 important intellectual content, read and approved the final version that was submitted for  
49  
50 publication.  
51  
52  
53  
54  
55

### 56 **Acknowledgement**

57  
58  
59  
60



1  
2  
3  
4 We are indebted to the project staff for their dedication to the study. We thank physicians and  
5  
6 midwives at the participating units for their corporation, The Department of Biostatistics, Aalborg  
7  
8 University, epidemiologist Kim Overvad, Aalborg University Hospital, Professor Niels Jørgen  
9  
10 Secher, Hvidovre Hospital, and medical statistician Paul Seed, Division of Women's Health, King's  
11  
12 College London School of Medicine for critical review of the study protocol and advice.  
13  
14  
15  
16  
17

### 18 **Funding**

19  
20 The study was funded by grants from: the Augustinus Foundation, the Obel Family Foundation, the  
21  
22 Oticon Foundation, the University College North Jutland Research and Development Fund, and the  
23  
24 Danish Association of Midwives, all of which are gratefully acknowledged. The work of the authors  
25  
26 was completely independent and the study funders had no influence on the design of the study, the  
27  
28 collection, analysis or interpretation of data, the writing of the manuscript, or its submission for  
29  
30 publication.  
31  
32  
33  
34  
35

### 36 **Competing interests**

37  
38 All authors have completed the Unified Competing Interest form at  
39  
40 [www.icmje.org/coi\\_disclosure.pdf](http://www.icmje.org/coi_disclosure.pdf)**Error! Hyperlink reference not valid.** (available on request  
41  
42 from the corresponding author) and declare: CO had research grants (paid to her institution) from:  
43  
44 the Augustinus Foundation, the Obel Family Foundation, the Oticon Foundation, the University  
45  
46 College North Jutland Research and Development Fund, and the Research Foundation of the Danish  
47  
48 Association of Midwives for the submitted work; no financial relationships with any organisations  
49  
50 that might have an interest in the submitted work in the previous 3 years; no other relationships or  
51  
52 activities that could appear to have influenced the submitted work.  
53  
54  
55  
56  
57  
58  
59  
60

### **Copyright/licence for publication**

1  
2  
3  
4 The Corresponding Author has the right to grant on behalf of all authors and does grant on behalf of  
5 all authors an exclusive licence (or non exclusive for government employees) on a worldwide basis  
6 to the BMJ Publishing Group Ltd and its licensees, to permit this article (if accepted) to be  
7 published in BMJ editions and any other BMJPG products and to exploit all subsidiary rights, as set  
8 out in our licence (<http://resources.bmj.com/bmj/authors/checklists-forms/licence-for-publication>).  
9  
10  
11  
12  
13  
14  
15  
16  
17

### 18 Reference List

- 20 (1) Delamothe T. Throwing the baby back into the bathwater. *BMJ* 2010; 341:c4192.
- 21 (2) Klein MC. The Quebec Midwifery Experiment: Lessons for Canada. *Can J Public Health*  
22 2000; 91(1):5-6.
- 23 (3) Moster D, Lie RT, Markestad T. Fornuft og følelser i fødselsomsorgen. *Tidsskr Nor*  
24 *Lægeforen* 2005; 20(125):2818-2820.
- 25 (4) Roemer VM, Ramb S. Zentralisierung in der Geburtshilfe: Pro und Contra. *Z Geburtsh*  
26 *Neonatal* 1996; 200:2-12.
- 27 (5) Tuffnell D. Editorial: Place of delivery and adverse outcomes. *BMJ* 2010; 341(c5560).
- 28 (6) Saunders D, Boulton M, Chapple J. Evaluation of the Edgware Birth Center. Middlesex:  
29 2000.
- 30 (7) Waldenström U, Nilsson C-A. Experience of childbirth in birth center care. A Randomized,  
31 Controlled Study. *Acta Obstet Gynecol Scand* 1994; 73:547-554.
- 32 (8) Coyle KL, Hauck Y, Percival P et al. Ongoing relationships with a personal focus: mothers'  
33 perceptions of birth centre versus hospital care. *Midwifery* 2001; 17(3):171-181.
- 34 (9) Cunningham JD. Experiences of Australian mothers who gave birth either at home, at a birth  
35 centre or in hospital labour wards. *Soc Sci Med* 1993; 36:475-483.
- 36 (10) Fraser W, Hatem-Asmar M, Krauss I et al. Comparison of midwifery care to medical care in  
37 hospitals in the Quebec pilot projects study: clinical indicators. L'Equipe d'Evaluation des  
38 Projets-Pilotes Sages-Femmes. *Can J Public Health* 2000 2000; 91;1:I5-I11. ,
- 39 (11) Baker SR, Choi PYL, Henshaw CA et al. 'I Felt as though I'd been in Jail': Women's  
40 Experiences of Maternity Care during Labour, Delivery and the Immediate Postpartum. *Fem*  
41 *Psychol* 2005; 15(3):315-342.
- 42 (12) Hodnett ED, Downe S, Walsh D et al. Alternative versus conventional institutional settings  
43 for birth. *Cochrane Database Syst Rev* 2010;(9):Art. No. CD000012.  
44 DOI:10.1002?14651858.CD000012.pub3.  
45  
46  
47  
48  
49  
50  
51  
52  
53  
54  
55  
56  
57  
58  
59  
60

- 1  
2  
3  
4  
5  
6  
7  
8  
9  
10  
11  
12  
13  
14  
15  
16  
17  
18  
19  
20  
21  
22  
23  
24  
25  
26  
27  
28  
29  
30  
31  
32  
33  
34  
35  
36  
37  
38  
39  
40  
41  
42  
43  
44  
45  
46  
47  
48  
49  
50  
51  
52  
53  
54  
55  
56  
57  
58  
59  
60
- (13) Hundley VA, Milne JM, Glazener MA et al. Satisfaction and the three C's: continuity, choice and control. Womens's views from a randomised controlled trial of midwife-led care. *Br J Obstet Gynaecol* 1997; 104:1273-1280.
  - (14) Redshaw M, Heikkila K. Delivered with care: a national survey of women's experience of maternity care in England. Oxford: National Perinatal Epidemiology Unit; 2010.
  - (15) National Perinatal Epidemiology Unit. The Birthplace in England Research Programme. Report of Component Study 1: Terms and Definitions. England: Oxford University; 2007.
  - (16) Jackson DJ, Lang JM, Swartz WH et al. Outcomes, Safety, and Resource Utilization in a Collaborative Care Birth Center Program Compared With Traditional Physician-Based Perinatal Care. *Am J Public Health* 2003; 93(6):999-1006.
  - (17) Stone PW. Maternity care outcomes: assessing a nursing model of care for low-risk pregnancy. *Outcomes Manag Nurs Pract* 1998; 2(2):271-275.
  - (18) Feldman E, Hurst M. Outcomes and procedures in low risk birth: A comparison of hospital and birth center settings. *Birth* 1987; 1:18-24.
  - (19) Baird AG, Jewell D, Walker JJ. Management of labour in an isolated rural maternity hospital. *BMJ* 1996; 312(7025):223-226.
  - (20) Chamberlain M, Nair R, Nimrod C et al. Evaluation of a Midwifery Birthing Center in the Canadian North. *Circumpolar Health* 1998; 57;Suppl 1:116.-120.
  - (21) David M, Pachaly J, Vetter K et al. [Birthplace free-standing birth center -- perinatal data in comparison with clinic deliveries in Bavaria and Berlin]. *Z Geburtshilfe Neonatol* 2004; 208(3):110-117.
  - (22) Eakins PS, O'Reilly WB, May LJ et al. Obstetric outcomes at the birth place in Menlo park: the first seven years. *Birth* 1989; 16:123-129.
  - (23) Reddy K, Reginald PW, Spring JE et al. N. A free-standing low-risk maternity unit in the United Kingdom: does it have a role? *J Obstet Gynaecol* 2004; 24(4):360-366.
  - (24) Rooks JP, Weatherby NL, Ernst EK. The National Birth Center Study. Part II--Intrapartum and immediate postpartum and neonatal care. *J Nurse Midwifery* 1992; 37(5):301-330.
  - (25) Schuppe C. 10 Jahre Geburtshaus Charlottenburg. *Kinderkrankenschwester* 1997; 16(10):429-430.
  - (26) Scupholme A, McLeod AGW, Robertson EG. A birth center affiliated with the tertiary care center: Comparison of outcome. *Obstet Gynecol* 1986; 4:598-603.
  - (27) Schmidt N, Abelsen B, Øian P. Deliveries in maternity homes in Norway: results from a 2-year prospective study. *Acta Obstet Gynecol Scand* 2002; 8;8:731-737.
  - (28) David M, von Schwarzenfeld HK, Dimer JA et al. Perinatal outcome in hospital and birth center obstetric care. *Int J Gynaecol Obstet* 1999; 65(2):149-156.

- 1  
2  
3  
4  
5 (29) Stone PW, Walker PH. Clinical and Cost Outcomes of a Free-standing Birth Center: A  
6 Comparison Study. *Clin Excell Nurse Pract* 1997; 7:456-465.  
7  
8 (30) Swartz W, Jackson D, Lang J et al. The BirthPlace collaborative practice model: results  
9 from the San Diego Birth Center Study. *Prim Care Update Ob Gyns* 1998; 1;5(4):207.  
10  
11 (31) Stewart M, McCandlish R, Henderson J et al. Review of evidence about clinical,  
12 psychosocial and economic outcomes for women with straightforward pregnancies who plan  
13 to give birth in a midwife-led birth centre, and outcomes for their babies. Oxford: The  
14 National Perinatal Epidemiology Unit; 2005.  
15  
16 (32) Hendrix M, Van Horch M, Moreta D et al. Why women do not accept randomisation for  
17 place of birth: feasibility of a RCT in The Netherlands. *BJOG* 2009; 116(4):537-542.  
18  
19 (33) Matzen B. Behovet for jordemoderlede fødeklinikker på Fyn samt analyse og  
20 markedsføring af det frie sygehusvalg i forbindelse med graviditet og fødsel. Speciale.  
21 Center for Cand. Negot. Studiet. Odense: Syddansk Universitet; 1997.  
22  
23 (34) Vandenbroucke JP, von Elm E, Altman DG et al. Strengthening the Reporting of  
24 Observational Studies in Epidemiology (STROBE): explanation and elaboration.  
25 *Epidemiology* 2007; 18(6):805-835.  
26  
27 (35) von Elm E, Altman DG, Egger M et al. Strengthening the Reporting of Observational  
28 Studies in Epidemiology (STROBE) statement: guidelines for reporting observational  
29 studies. *BMJ* 2007; 335(7624):806-808.  
30  
31 (36) Justitsministeriet. Lov nr. 429 om behandling af personoplysninger af 31. maj 2000 som  
32 ændret ved lov nr. 280 af 25. april 2001.  
33  
34 (37) Cummings P, McKnight B, Greenland S. Matched Cohort Methods for Injury Research.  
35 *Epidemiol Rev* 2003; 25:43-50.  
36  
37 (38) Greenland S, Morgenstern H. Matching and efficiency in cohort studies. *Am J Epidemiol*  
38 1990; 131(1):151-159.  
39  
40 (39) Faresjo T, Faresjo A. To match or not to match in epidemiological studies--same outcome  
41 but less power. *Int J Environ Res Public Health* 2010; 7(1):325-332.  
42  
43 (40) Lorentzen A, Krogh R. Oplevelsesøkonomi, udvikling og planlægning i Nordjyske  
44 kommuner. Aalborg: Institut for samfundsudvikling og planlægning. Aalborg University;  
45 2009.  
46  
47 (41) Danmarks Statistik. Statistikbanken. 03.02.2011.  
48 <http://www.statistikbanken.dk/statbank5a/default.asp?w=1280>.  
49  
50 (42) Mortensen LH, Diderichsen F, Davey Smith G et al. Time is on whose side? Time trends in  
51 the association between maternal social disadvantage and offspring fetal growth. A study of  
52 1 409 339 births in Denmark, 1981-2004. *J Epidemiol Community Health* 2009; 63(4):281-  
53 285.  
54  
55  
56  
57  
58  
59  
60

- 1  
2  
3  
4  
5 (43) Gissler M, Rahkonen O, Arntzen A et al. Trends in socioeconomic differences in Finnish  
6 perinatal health 1991-2006. *J Epidemiol Community Health* 2009; 63(6):420-425.  
7  
8 (44) Wilkinson RG, Pickett K. *The Spirit Level: Why equality is better for every one*. United  
9 Kingdom: Penguin Books Ltd; 2010.  
10  
11 (45) Blumenshine P, Egerter S, Barclay CJ et al. Socioeconomic disparities in adverse birth  
12 outcomes: a systematic review. *Am J Prev Med* 2010; 39(3):263-272.  
13  
14 (46) National Institute for health and clinical excellence. *Intrapartum care for healthy women and*  
15 *their babies during childbirth*. NICE clinical guideline 55. 2007.  
16  
17 (47) Deeks JJ, Dinnes J, D'Amico R et al. Evaluating non-randomised intervention studies.  
18 *Health Technol Assess* 2003; 7(27):iii-173.  
19  
20 (48) Rawlins MD. DE TESTIMONIO. On the evidence for decisions about the use of therapeutic  
21 interventions. THE HARVEIAN ORATION. Delivered before the Fellows of The Royal  
22 College of Physicians of London on Thursday 16 October 2008. Royal College of  
23 Physicians; 2008.  
24  
25 (49) The Region of North Jutland. Population information 01.02.2011.  
26 <http://www.rm.dk/Regionen/FaktaOmNordjylland/Befolkning.htm>. Denmark: 2011.  
27  
28 (50) Hodnett ED, Gates S, Hofmeyr GJ et al. Continuous support for women during childbirth.  
29 *Cochrane Database Syst Rev* 2007; art. no.:CD003766. DOI:  
30 10.1002/14651858.CD003766.pub2.  
31  
32 (51) Gupta J, Hofmeyr G, Smyth R. Position in the second stage of labor for women without  
33 epidural analgesia. *Cochrane Database Syst Rev* 3 2005;  
34 art.no:CD002006.DOI:002010.001002 / 14651858.CD14002006.pub14651852.  
35  
36 (52) Lawrence A, Levis L, Hofmeyr G, et al. Maternal positions and mobility during the first  
37 stage of labour. *Cochrane Database Syst Rev* 2 2009; art.no: CD003934;doi:003910.001002  
38 / 14651858.CD14003934.pub14651852.  
39  
40 (53) Gabbe SG, Niebyl JR, Simpson JL (eds). *Obstetrics : Normal and Problem Pregnancies*. 4  
41 ed. USA: Churchill Livingstone; 2002.  
42  
43 (54) Simpson KR, James DC. Effects of oxytocin-induced uterine hyperstimulation during labor  
44 on fetal oxygen status and fetal heart rate patterns. *Am J Obstet Gynecol* 2008; 199(1):34-35.  
45  
46 (55) World Health Organisation. *Neonatal and perinatal mortality: country, regional and global*  
47 *estimates*. WHO; 2006.  
48  
49 (56) Sundhedsstyrelsen. *Fødsler, graviditet og BMI - 1. halvår 2008*. København:  
50 Sundhedsstyrelsen; 2008.  
51  
52 (57) Bonderup T, Nibe M, Jensen T. *Valg af fødested - en undersøgelse af gravides valg af*  
53 *fødested og deres ønsker for tilbud på fødeklinikker*. Aalborg: Nordjyllands Amt. Center for  
54 *Kompetenceudvikling*; 2005.  
55  
56  
57  
58  
59  
60

Figure 1: Study flow chart

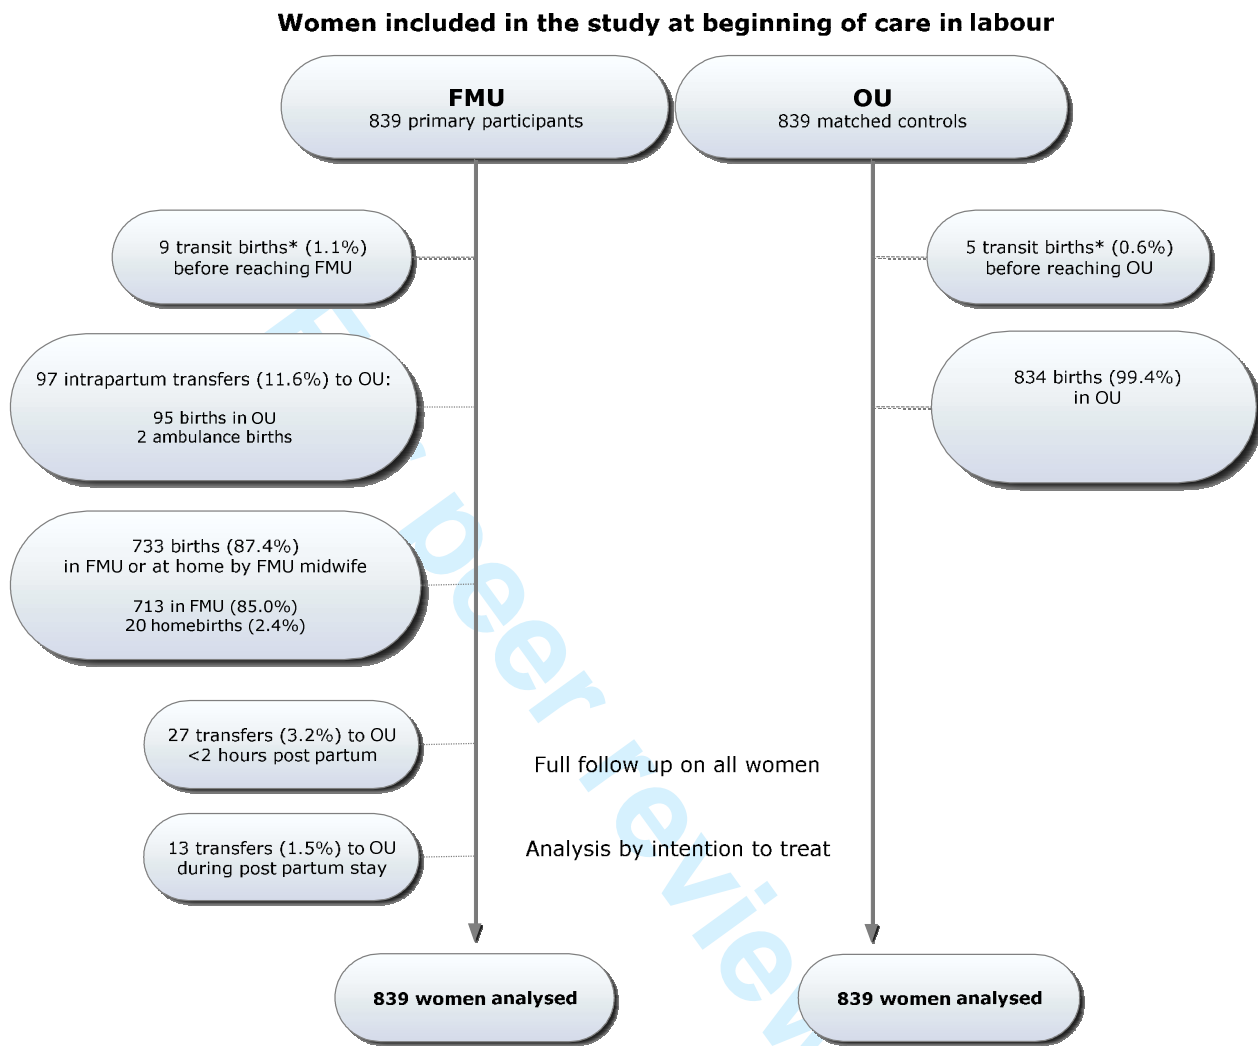

\* Birth occurring unplanned at home or during transport were included if the woman <24 hours before had consulted a midwife and been advised to stay at home longer / return to her home

Table 1: Matching characteristics

1  
2  
3  
4  
5  
6  
7  
8  
9  
10  
11  
12  
13  
14  
15  
16  
17  
18  
19  
20  
21  
22  
23  
24  
25  
26  
27  
28  
29  
30  
31  
32  
33  
34  
35  
36  
37  
38  
39  
40  
41  
42  
43  
44  
45  
46  
47  
48  
49  
50  
51  
52  
53  
54  
55  
56  
57  
58  
59  
60

| Characteristics                                        | FMU | (%)    | OU  | (%)    |
|--------------------------------------------------------|-----|--------|-----|--------|
| <b>Complete match retained in all cases</b>            |     |        |     |        |
| <b>Obstetric risk status</b>                           |     |        |     |        |
| Low risk                                               | 839 | (100)  | 839 | (100)  |
| <b>Parity</b>                                          |     |        |     |        |
| Primiparous                                            | 215 | (25.6) | 215 | (25.6) |
| Multiparous                                            | 624 | (74.4) | 624 | (74.4) |
| <b>Smoking status</b>                                  |     |        |     |        |
| Non-smoker                                             | 684 | (81.5) | 684 | (81.5) |
| 1-9 cigarettes                                         | 59  | (7.0)  | 59  | (7.0)  |
| 10 or more cigarettes                                  | 96  | (11.5) | 96  | (11.5) |
| <b>Individuals matched within ranges/groups</b>        |     |        |     |        |
| <b>BMI</b>                                             |     |        |     |        |
| <18                                                    | 17  | (2.1)  | 22  | (2.6)  |
| 18-24.9                                                | 528 | (62.9) | 530 | (63.2) |
| 25-29.9                                                | 226 | (26.9) | 219 | (26.1) |
| >30                                                    | 68  | (8.1)  | 68  | (8.1)  |
| <b>Age</b>                                             |     |        |     |        |
| 16-20                                                  | 24  | (2.9)  | 25  | (3.0)  |
| 21-35                                                  | 731 | (87.1) | 716 | (85.3) |
| >35                                                    | 84  | (10.0) | 98  | (11.7) |
| <b>Ethnicity</b>                                       |     |        |     |        |
| Nordic or Western European                             | 805 | (96.0) | 809 | (96.4) |
| Eastern European or Asian                              | 27  | (3.2)  | 22  | (2.6)  |
| Arab or African                                        | 7   | (0.8)  | 8   | (1.0)  |
| <b>Education level*</b>                                |     |        |     |        |
| No training/education qualifying for the labour market | 216 | (25.7) | 217 | (25.9) |
| Skilled training                                       | 255 | (30.4) | 255 | (30.4) |
| 1-2 ½ years of post-secondary education                | 84  | (10.0) | 81  | (9.6)  |
| 3-4 years of post-secondary education                  | 254 | (30.3) | 256 | (30.5) |

|                                           |     |        |     |        |
|-------------------------------------------|-----|--------|-----|--------|
| 5-6 years of post-secondary education     | 30  | (3.6)  | 30  | (3.6)  |
| <b>Occupation</b>                         |     |        |     |        |
| No paid work                              | 160 | (19.1) | 131 | (15.6) |
| Unskilled work                            | 107 | (12.7) | 119 | (14.2) |
| Skilled work <sup>‡</sup>                 | 542 | (64.6) | 557 | (66.4) |
| Academic work/manager or senior official: | 30  | (3.6)  | 32  | (3.8)  |
| <b>Cohabitation status</b>                |     |        |     |        |
| Living with partner                       | 815 | (97.1) | 819 | (97.6) |
| Not living with partner                   | 24  | (2.9)  | 20  | (2.4)  |

\* Students and trainees were classified along with the educational level for which they were being trained

<sup>‡</sup> All non-academic/non-managerial vocations requiring 1-4 years of post-secondary education/training<sup>51</sup>

**Table 2: Outcomes**

FMU (%)

OU (%)

RR

95%CI

P-value



| Primary outcomes:                                      |            |                |     |          |        |
|--------------------------------------------------------|------------|----------------|-----|----------|--------|
| Apgar score <7 after 5 min                             | 5 (0.6)    | 5 (0.6)        | 1   | 0.3-3.4  | 1.0000 |
| Caesarean section                                      | 19 (2.3)   | 34 (4.0)       | 0.6 | 0.3-0.9  | 0.0400 |
| Secondary perinatal outcomes                           |            |                |     |          |        |
| Apgar score <9 after 5 min                             | 15 (1.8)   | 20 (2.4)       | 0.8 | 0.4-1.5  | 0.4996 |
| Apgar score <7 after 1 min                             | 22 (2.6)   | 25 (3.0)       | 0.9 | 0.5-1.6  | 0.7709 |
| Neonatal asphyxia                                      | 27 (3.2)   | 41 (4.9)       | 0.7 | 0.4-1.1  | 0.1143 |
| Neonatal admittance to NICU                            | 28 (3.3)   | 42 (5.0)       | 0.7 | 0.4-1.1  | 0.1143 |
| Neonatal stay in NICU >48 hours                        | 14 (1.7)   | 15 (1.8)       | 0.9 | 0.5-1.9  | 1.0000 |
| Neonatal re-admission hospital 0-28 days postpartum    | 26 (3.1)   | 35 (4.2)       | 0.7 | 0.4-1.1  | 0.1480 |
| Child live born                                        | 839 (100)  | 839 (100)      |     |          |        |
| Perinatal/neonatal death                               | 1*         | 0              |     |          |        |
| Secondary maternal outcomes                            |            |                |     |          |        |
| Abnormal fetal heart rate leading to action            | 34 (4.1)   | 98 (11.7)      | 0.3 | 0.2-0.5  | 0.0000 |
| Dystocia in labour                                     | 88 (10.5)  | 234 (27.9)     | 0.4 | 0.3-0.5  | 0.0000 |
| Intrapartum fetal-pelvic complications <sup>‡</sup>    | 3 (0.4)    | 16 (1.9)       | 0.2 | 0.05-0.6 | 0.0044 |
| Shoulder dystocia                                      | 3 (0.4)    | 12 (1.4)       | 0.3 | 0.1-0.9  | 0.0352 |
| Meconium-stained amniotic fluid                        | 136 (16.2) | 148 (17.6)     | 0.9 | 0.7-1.1  | 0.4004 |
| Occipital posterior presentation at birth <sup>π</sup> | 13 (1.6)   | 28 (3.3)       | 0.5 | 0.3-0.9  | 0.0201 |
| Postpartum haemorrhage >500 ml                         | 29 (3.5)   | 68 (8.1)       | 0.4 | 0.3-0.7  | 0.0001 |
| Postpartum haemorrhage > 1000 ml                       | 11 (1.3)   | 14 (1.7)       | 0.8 | 0.4-1.7  | 0.6900 |
| Intact perineum                                        | 514 (61.3) | 466 (55.5)     | 1.1 | 1.02-1.2 | 0.0142 |
| 1 <sup>st</sup> /2 <sup>nd</sup> degree tear           | 290 (34.6) | 337 (40.2)     | 0.9 | 0.8-0.97 | 0.0154 |
| 3 <sup>rd</sup> /4 <sup>th</sup> degree tears          | 19 (2.3)   | 24 (2.9)       | 0.8 | 0.4-1.4  | 0.5224 |
| Readmission /outpatient visit 0-28 days postpartum     | 24 (2.9)   | 40(4.8)        | 0.6 | 0.4-1.0  | 0.0599 |
| Discharge <6 hours postpartum                          | 106 (12.6) | 191 (22.8)     | 0.6 | 0.5-0.7  | 0.0000 |
| Severe maternal morbidity                              | 0          | 1 <sup>±</sup> |     |          |        |

\*The infant was born with severe diaphragmatic hernia, not detected by ultrasound screening at 19.4 weeks.

<sup>‡</sup> Including diagnosis for: abnormal maternal pelvis, cephalopelvic disproportion and failed ventouse delivery

<sup>π</sup> Deliveries by caesarean section excluded from this analysis

<sup>±</sup> Uterine rupture followed by peripartum hysterectomy in a multipara having epidural analgesia and oxytocin augmentation

**Table 3: Birth interventions and pain relief**

1  
2  
3  
4  
5  
6  
7  
8  
9  
10  
11  
12  
13  
14  
15  
16  
17  
18  
19  
20  
21  
22  
23  
24  
25  
26  
27  
28  
29  
30  
31  
32  
33  
34  
35  
36  
37  
38  
39  
40  
41  
42  
43  
44  
45  
46  
47  
48  
49  
50  
51  
52  
53  
54  
55  
56  
57  
58  
59  
60

| Outcome                                    | FMU (n)    | OU (n)     | RR   | 95%CI     | P-value |
|--------------------------------------------|------------|------------|------|-----------|---------|
| <b>Birth interventions and pain relief</b> |            |            |      |           |         |
| Spontaneous vaginal birth                  | 796 (94.9) | 751 (89.5) | 1.06 | 1.03-1.09 | 0.0000  |
| Instrumental delivery*                     | 25 (3.0)   | 61 (7.8)   | 0.4  | 0.3-0.6   | 0.0000  |
| Oxytocin augmentation of labour            | 69 (8.2)   | 154 (18.6) | 0.5  | 0.3-0.6   | 0.0000  |
| Treatment for shoulder dystocia            | 1 (0.1)    | 10 (1.2)   | 0.1  | 0.01-0.8  | 0.0117  |
| One or more uterotonics                    | 675 (80.5) | 672 (80.1) | 1.0  | 0.9-1.0   | 0.9070  |
| Perineal suturing                          | 294 (35.0) | 366 (43.6) | 0.8  | 0.7-0.9   | 0.0002  |
| Intrauterine palpation                     | 5 (0.6)    | 16 (1.9)   | 0.3  | 0.1-0.9   | 0.0266  |
| <b>Pain relief</b>                         |            |            |      |           |         |
| Epidural analgesia                         | 35 (4.2)   | 86 (10.3)  | 0.4  | 0.3-0.6   | 0.0000  |
| Water tub for pain relief                  | 269 (32.1) | 197 (23.5) | 1.4  | 1.2-1.6   | 0.0001  |
| <b>Other</b>                               |            |            |      |           |         |
| Non recumbent position for birth           | 188 (22.4) | 158 (18.3) | 1.2  | 0.98-1.4  | 0.0964  |

\*FMU midwives had extended authorisation to perform ventouse deliveries in case of acute fetal distress in the second stage of labour (ventouse delivery is included in the ICM Essential Competencies for Midwifery Practice and midwives in many different settings and countries have acquired the necessary skills). This was used only once, in a case of acute bradycardia. Apgar score 2/1, 8/5, 10/10.

**Table 4: Causes of FMU to OU transfer**

|                                                                                     | Primipara (%)        | Multipara (%)       | All(%)                |
|-------------------------------------------------------------------------------------|----------------------|---------------------|-----------------------|
| <b>Total number of transfers intrapartum or &lt;2 hours after birth</b>             | <b>79/215 (36.7)</b> | <b>45/624 (7.2)</b> | <b>124/839 (14.8)</b> |
| <b>Causes for intrapartum transfers</b>                                             |                      |                     |                       |
| Failure to progress (cervical dilation >3 cm or during second stage)*               | 42 (53.2)            | 13(44.8)            | 55(44.4)              |
| Meconium-stained amniotic fluid                                                     | 9(11.4)              | 5(11.1)             | 14(11.3)              |
| Fetal heart rate abnormality                                                        | 5(6.3)               | 5(11.1)             | 10(8.1)               |
| Prolonged latent phase**/rupture of membranes > 24 hours (+birth not imminent)      | 3(3.8)               | 4(8.9)              | 7(5.6)                |
| Request for epidural analgesia                                                      | 5(6.3)               | 1(2.2)              | 6(4.8)                |
| Abnormal fetal presentation (cephalic or caudal presentation)                       | 4((5.1)              | 1(2.2)              | 5 (4.0)               |
| <b>Causes for transfers after birth but &lt;2 hours postpartum</b>                  |                      |                     |                       |
| Perineal trauma (complicated/3 <sup>rd</sup> -4 <sup>th</sup> degree tear)          | 10(12.7)             | 6(13.3)             | 16(12.9)              |
| Retained placenta/postpartum haemorrhage <500 ml                                    | 1(1.3)               | 8(17.8)             | 9(7.3)                |
| Minor respiratory problem (infant)                                                  | 0                    | 2(4.4)              | 2(1.6)                |
| <b>Total number of transfers intrapartum or &lt;2 hours after birth</b>             | <b>79(100)</b>       | <b>45(100)</b>      | <b>124(100)</b>       |
| <b>Causes for transfers &gt;2 hours after birth/during postpartum stay</b>          |                      |                     |                       |
| Neonatal cause (light for date, minor respiratory problem, hypoglycaemia, jaundice) | 6(85.7)              | 5(83.3)             | 11(84.6)              |
| Maternal cause (post partum bleeding, infection)                                    | 1(14.3)              | 1(16.7)             | 2(15.3)               |
| <b>Total number of postpartum transfers</b>                                         | <b>7(100)</b>        | <b>6(100)</b>       | <b>13(100)</b>        |

\*Delay in the first stage of labour was defined as no progress for two hours and delay in the second stage as a duration of active second stage of >2 hours for primiparas and >1 hour for multiparas

\*\* If painful contractions >24 hours and a cervical dilatation <3 cm (or before if preferred by the woman).

**Web only / supplementary information:**

**Table A: Characteristics of freestanding midwifery units**

|                                                           | Hobro FMU                                                                                                                                                                                                                                                                                                                                                                                                                                                                            | Frederikshavn FMU                                                                                                                                                                                                                                                                                                                                                                                                                                                                   |
|-----------------------------------------------------------|--------------------------------------------------------------------------------------------------------------------------------------------------------------------------------------------------------------------------------------------------------------------------------------------------------------------------------------------------------------------------------------------------------------------------------------------------------------------------------------|-------------------------------------------------------------------------------------------------------------------------------------------------------------------------------------------------------------------------------------------------------------------------------------------------------------------------------------------------------------------------------------------------------------------------------------------------------------------------------------|
| <b>Geographical setting</b>                               | District/community hospital, southern town in region (11 000 inhabitants)                                                                                                                                                                                                                                                                                                                                                                                                            | District/community hospital, northern town in region (24 000 inhabitants)                                                                                                                                                                                                                                                                                                                                                                                                           |
| <b>Obstetrical assistance</b>                             | Not available<br>No epidurals or argumentation                                                                                                                                                                                                                                                                                                                                                                                                                                       | Not available<br>No epidurals or argumentation                                                                                                                                                                                                                                                                                                                                                                                                                                      |
| <b>Assistance for maternal and neonatal emergencies *</b> | 24-hour emergency assistance on site from anaesthesiologist (day) / resuscitation-capable specialist nurse (evening + night).                                                                                                                                                                                                                                                                                                                                                        | 24-hour emergency assistance on site from anaesthesiologist (day) / resuscitation-capable specialist nurse (evening + night).                                                                                                                                                                                                                                                                                                                                                       |
| <b>Midwifery staff and training</b>                       | Experienced local midwives whose employment predated unit's conversion into FMU, working in 24 hour shifts in an economically sustainable, team care model<br><br>Multidisciplinary mannequin training in obstetrical emergencies, including ventouse delivery <sup>‡</sup><br><br>FMU midwives provided antenatal care and out-of-hours post partum care for all women in the area booked for both OU and FMU birth. FMU midwives also assisted at the nearest OU, if FMU not busy. | Experienced local midwives whose employment predated unit's conversion into FMU, working in 24 hour shifts in a economically sustainable, team care model<br><br>Multidisciplinary mannequin training in obstetrical emergencies, including ventouse delivery <sup>‡</sup><br><br>FMU midwives provided antenatal care and out-of-hours post partum care for all women in the area booked for both OU and FMU birth. FMU midwives also assisted at the nearest OU, if FMU not busy. |
| <b>Minimum transfer time</b>                              | 35 minutes<br><br>If possible, FMU midwives accompanied women who were transferred to an OU and continued care, supervised by an obstetrician.                                                                                                                                                                                                                                                                                                                                       | 25 minutes<br><br>If possible, FMU midwives accompanied women who were transferred to an OU and continued care, supervised by an obstetrician.                                                                                                                                                                                                                                                                                                                                      |
| <b>Women transferred to</b>                               | OU, Aalborg Hospital                                                                                                                                                                                                                                                                                                                                                                                                                                                                 | OU, Vendsyssel Hospital                                                                                                                                                                                                                                                                                                                                                                                                                                                             |
| <b>Some women may choose</b>                              | OU, Randers Hospital or OU, Viborg Hospital                                                                                                                                                                                                                                                                                                                                                                                                                                          | OU, Aalborg Hospital                                                                                                                                                                                                                                                                                                                                                                                                                                                                |

|                                 |                                                                                                                                                                                                                                                                                                                 |                                                                                                                                                                                                                                                                                                                        |
|---------------------------------|-----------------------------------------------------------------------------------------------------------------------------------------------------------------------------------------------------------------------------------------------------------------------------------------------------------------|------------------------------------------------------------------------------------------------------------------------------------------------------------------------------------------------------------------------------------------------------------------------------------------------------------------------|
| <b>transfer to:</b>             | (out-of-region hospitals)                                                                                                                                                                                                                                                                                       |                                                                                                                                                                                                                                                                                                                        |
| <b>Number of birthing rooms</b> | 2                                                                                                                                                                                                                                                                                                               | 2                                                                                                                                                                                                                                                                                                                      |
| <b>Birthing facilities</b>      | Conventional birthing rooms with easy access to birthing pool and shower. Other facilities such as resting room, living room, corridor and kitchen were also used                                                                                                                                               | Large birthing rooms with birthing pool, shower and both double bed and obstetric bed. Other facilities such as living room, corridor and kitchen were also used                                                                                                                                                       |
| <b>Care characteristics</b>     | One-to-one care and continuous support in labour most often available<br>Mobility and use of different labour positions encouraged. Music used for relaxation                                                                                                                                                   | One-to-one care and continuous support in labour most often available<br>Mobility and use of different labour positions encouraged. Music used for relaxation                                                                                                                                                          |
| <b>Cardiotocography (CTG)</b>   | Admission CTG offered to all women<br>Transfer performed if CTG indicated                                                                                                                                                                                                                                       | Admission CTG offered to all women<br>Transfer performed if CTG indicated                                                                                                                                                                                                                                              |
| <b>Early labour assessment</b>  | Home visits occasionally offered                                                                                                                                                                                                                                                                                | Home visits occasionally offered (10-20%)                                                                                                                                                                                                                                                                              |
| <b>Homebirth<sup>‡</sup></b>    | Offered as part of service                                                                                                                                                                                                                                                                                      | Offered as part of service                                                                                                                                                                                                                                                                                             |
| <b>Postnatal care</b>           | 3-4 days in family rooms, family friendly environment, always possible for partner to stay.<br>No postnatal staff during night<br>Full 'baby-friendly' WHO/UNICEF accreditation<br>Women with no post partum complications who had given birth in the OUs could be transferred to the FMUs for post partum care | 3-4 days in 2-bed postnatal rooms, family friendly environment, always possible for partner to stay. No postnatal staff during night.<br>Full 'baby-friendly' WHO/UNICEF accreditation<br>Women with no post partum complications who had given birth in the OUs could be transferred to the FMUs for post partum care |
| <b>Antenatal care</b>           | The region's 'standard package' of antenatal care offered by FMU midwives                                                                                                                                                                                                                                       | The region's 'standard package' of antenatal care offered by FMU midwives                                                                                                                                                                                                                                              |

\* Only for emergencies such as maternal collapse, severe postpartum haemorrhage or need for neonatal resuscitation.

<sup>‡</sup>Ventouse delivery is included in the ICM Essential Competencies for Midwifery Practice and midwives in many different settings and countries (including FMUs in e.g. the UK, Norway and Denmark) have acquired the necessary skills

<sup>‡</sup> As selection criteria for home birth and FMU were identical, both home birth and FMU birth were offered to all low-risk women by FMU midwives. Women could change their decision about place of birth at any time, also during labour.

Table B: Characteristics of obstetric units

| Characteristics                     | Aalborg OU                                                                                                                                                    | Vendsyssel OU                                                                                                                                                        |
|-------------------------------------|---------------------------------------------------------------------------------------------------------------------------------------------------------------|----------------------------------------------------------------------------------------------------------------------------------------------------------------------|
| <b>Geographical setting</b>         | Specialist, university hospital, located in main city of the region (120.000 inhabitants)                                                                     | Provincial hospital, centrally placed in the North of the region (25.000 inhabitants)                                                                                |
| <b>Facilities</b>                   | Neonatal intensive care unit<br>Neonatal surgical<br>Adult intensive care                                                                                     | Generalised paediatric unit with neonatal beds<br>Adult intensive care unit                                                                                          |
| <b>Consultant obstetrician</b>      | 24-hour service on site                                                                                                                                       | On site during daytime                                                                                                                                               |
| <b>Consultant paediatrician</b>     | 24-hour service on site                                                                                                                                       | On site during daytime                                                                                                                                               |
| <b>Consultant anaesthesiologist</b> | 24-hour service on site                                                                                                                                       | On site during daytime ( resuscitation-capable specialist nurse on site during night)                                                                                |
| <b>Midwifery staff</b>              | Mixed level of experience<br>Most OU midwives also provided antenatal care for both high and low risk women in the area<br>24-hour consultant midwife on site | Mixed level of experience<br>Most OU midwives also provided antenatal care for both high and low risk women in the area<br>Consultant midwife on site during daytime |
| <b>Number of labour rooms</b>       | 12                                                                                                                                                            | 5                                                                                                                                                                    |
| <b>Birthing facilities</b>          | Conventional birthing rooms. 1 room with birthing pool, access to two labour pools<br>Most women stay in birthing room during labour                          | Conventional birthing rooms, two rooms with birthing pool<br>Most women stay in birthing room during labour                                                          |
| <b>Care characteristics</b>         | One-to-one care and continuous support in labour typically not available                                                                                      | One-to-one care and continuous support in labour typically not available                                                                                             |
| <b>CTG</b>                          | No admission CTG<br>Auscultation used in low-risk labour (continuous CTG used in case of oxytocin augmentation and epidural analgesia)                        | No admission CTG<br>Auscultation used in low-risk labour (continuous CTG used in case of oxytocin augmentation and epidural analgesia)                               |
| <b>Early labour assessment</b>      | Home visits not offered                                                                                                                                       | Home visits not offered                                                                                                                                              |
| <b>Postnatal care</b>               | Conventional postnatal ward (nurse staff)                                                                                                                     | Conventional postnatal ward (nurse staff)                                                                                                                            |

|                                |                                                                          |                                                                          |
|--------------------------------|--------------------------------------------------------------------------|--------------------------------------------------------------------------|
| ( <u>complicated birth</u> )   | 2-4 postnatal beds per room                                              | 2-4 postnatal beds per room                                              |
| <b>Postnatal care</b>          | 3-4 days on midwifery ward                                               | 3-4 days in same conventional postnatal ward                             |
| ( <u>uncomplicated birth</u> ) | 2-4 postnatal beds per room                                              | as women with complicated birth                                          |
|                                | Rarely possible for partner to stay                                      | Rarely possible for partner to stay                                      |
|                                | Postnatal staff on ward 24 hours a day                                   | Postnatal staff on ward 24 hours a day                                   |
| <b>Antenatal care</b>          | The region's 'standard package' of antenatal care offered by OU midwives | The region's 'standard package' of antenatal care offered by OU midwives |

For peer review only

1  
2  
3  
4  
5  
6  
7  
8  
9  
10  
11  
12  
13  
14  
15  
16  
17  
18  
19  
20  
21  
22  
23  
24  
25  
26  
27  
28  
29  
30  
31  
32  
33  
34  
35  
36  
37  
38  
39  
40  
41  
42  
43  
44  
45  
46  
47  
48  
49  
50  
51  
52  
53  
54  
55  
56  
57  
58  
59  
60

1  
2  
3  
4  
5  
6  
7  
8  
9  
10  
11  
12  
13  
14  
15  
16  
17  
18  
19  
20  
21  
22  
23  
24  
25  
26  
27  
28  
29  
30  
31  
32  
33  
34  
35  
36  
37  
38  
39  
40  
41  
42  
43  
44  
45  
46  
47  
48  
49  
50  
51  
52  
53  
54  
55  
56  
57  
58  
59  
60**Table C: Adverse outcomes: maternal morbidity, perinatal death, 5 min Apgar score <7, >1 week NICU stay**

| Cases                              | Apgar score | Birth description                                                                                                                                                                                                                                                                                                                                                                                                                                                                                                                                                                                                                                                                                                                                                                                                 | Place of birth | Days in NICU | Neonatal events                                                                                                                                                                                                                                                      |
|------------------------------------|-------------|-------------------------------------------------------------------------------------------------------------------------------------------------------------------------------------------------------------------------------------------------------------------------------------------------------------------------------------------------------------------------------------------------------------------------------------------------------------------------------------------------------------------------------------------------------------------------------------------------------------------------------------------------------------------------------------------------------------------------------------------------------------------------------------------------------------------|----------------|--------------|----------------------------------------------------------------------------------------------------------------------------------------------------------------------------------------------------------------------------------------------------------------------|
| <b>Freestanding Midwifery Unit</b> |             |                                                                                                                                                                                                                                                                                                                                                                                                                                                                                                                                                                                                                                                                                                                                                                                                                   |                |              |                                                                                                                                                                                                                                                                      |
| Case 1                             | 3/5         | <p><b>The only case of perinatal/neonatal mortality in the study</b></p> <p>Multipara</p> <p>FMU in active labour, normal admission CTG, clear amniotic fluid, spontaneous vaginal birth. Respiratory failure 2-3 minutes after birth. Anaesthesiological assistance called, immediate <b>advanced resuscitation attempted but the infant did not respond.</b></p> <p>The rare and severe condition of the infant was not detected by antenatal ultrasound screening at 19.4 weeks. Had the mother not chosen FMU care, this infant would most likely have been born in the nearest OU, here located in a provincial hospital with a generalised paediatric unit (consultant paediatrician, obstetrician and anaesthesiologist on call outside daytime). Transfer required to specialised unit (305 km away).</p> | FMU            | 0            | <p><b>Infant dead</b></p> <p><b>Severe congenital malformation</b> (diaphragmatic hernia).</p> <p>Occurrence 1:2500-1:5000, approx. 40% of infants have additional malformations. Total mortality (Danish population): 43%</p> <p>Advanced resuscitation on site</p> |
| Case 2                             | 4/5         | <p>Primipara</p> <p>Primary rupture of membranes, FMU 20 hours later, 1 cm cervical dilatation, normal admission CTG. Transferred to OU 6 hours later (3 cm dilatation) due to slow progress of labour and request for epidural.</p> <p><u>In OU:</u> shared care (OU midwife and obstetrician). Epidural, augmentation of labour, pathological CTG pattern. Pyrexia, meconium-stained fluid, fetal blood sampling, episiotomy, instrumental delivery of infant 7 hours after transfer</p>                                                                                                                                                                                                                                                                                                                        | OU             | 36 *         | <p>Ventilation</p> <p>Admitted to NICU shortly after birth, treated for sepsis and asphyxia. Continuous positive airway pressure (CPAP) and antibiotics. <b>Severe congenital heart disease</b>, surgery at 6 months</p> <p>Discharged well</p>                      |
| Case 3                             | 5/5         | <p>Primipara</p> <p>Primary rupture of membranes, presents at FMU 10 hours later, clear amniotic fluid, latent phase. Returns home after 6 hours, transferred to OU 24 hours after rupture of membranes.</p> <p><u>In OU:</u> shared care (OU midwife and obstetrician). Cervical dilatation 1 cm, augmentation of labour, no antibiotics, meconium-stained fluid. Spontaneous vaginal birth 6.5 hours after transfer.</p>                                                                                                                                                                                                                                                                                                                                                                                        | OU             | 5.7          | <p>No ventilation, short intubation for trachea suction. Admitted to NICU shortly after birth due to asphyxia and meconium aspiration CPAP, antibiotics</p> <p>Discharged well</p>                                                                                   |
| Case 4                             | 5/5         | <p>Primipara</p> <p>FMU during latent phase, 1 cm cervical dilatation. Normal admission CTG. After 9 hours, cervix dilated 3 cm, transferred to OU due to protracted latent phase</p> <p><u>In OU:</u> shared care (OU midwife and obstetrician). Amniotomy, augmentation of labour, epidural, CTG. Occipital posterior position, clear amniotic fluid. After 23 hours in OU, spontaneous vaginal birth</p>                                                                                                                                                                                                                                                                                                                                                                                                       | OU             | 0            | <p>No ventilation</p> <p>Child not admitted to NICU</p> <p>Discharged well</p>                                                                                                                                                                                       |
| Case 5                             | 6/5         | Multipara                                                                                                                                                                                                                                                                                                                                                                                                                                                                                                                                                                                                                                                                                                                                                                                                         | OU             | 0.6          | Ventilation, no chest                                                                                                                                                                                                                                                |



|                       |            |                                                                                                                                                                                                                                                                                                                                                                                                                                                                                                                                                                                                                                                 |     |                          |                                                                                                                                                                                                                                                                                                          |
|-----------------------|------------|-------------------------------------------------------------------------------------------------------------------------------------------------------------------------------------------------------------------------------------------------------------------------------------------------------------------------------------------------------------------------------------------------------------------------------------------------------------------------------------------------------------------------------------------------------------------------------------------------------------------------------------------------|-----|--------------------------|----------------------------------------------------------------------------------------------------------------------------------------------------------------------------------------------------------------------------------------------------------------------------------------------------------|
|                       |            | FMU at 2 cm cervical dilatation. Normal admission CTG. Transferred to OU 8 hours later because of no progress<br><u>In OU</u> : shared care (FMU midwife and obstetrician). Augmentation of labour, epidural. Pyrexia, antibiotics. Clear amniotic fluid. Caesarean section 5 hours after transfer because of pathological CTG                                                                                                                                                                                                                                                                                                                  |     |                          | compressions. Birth weight low for gestational age (2554 g). Child admitted to NICU for 14 hours, observation only<br>Discharged well                                                                                                                                                                    |
| Case 6                | (7/5)      | Multipara<br>FMU at 2 cm cervical dilatation, frequent painful contractions. <b>Admission CTG with pathological pattern, emergency transferred to OU</b> 1 hour after admittance. Tocolytic given for transfer, CTG pattern improves<br><u>In OU</u> : shared care (FMU midwife and obstetrician). CTG, Caesarean section 4 hours after transfer due to fetal distress. Abruptio placentae                                                                                                                                                                                                                                                      | OU  | <b>12.5</b><br><b>**</b> | Ventilation, no chest compressions. Admitted to NICU shortly after birth. CPAP and antibiotics. 2 days later, acute apnoea: Intubation, ventilation and transfer<br>Discharged well                                                                                                                      |
| Case 7                | (7/5)      | Primipara<br>FMU at 1 cm cervical dilatation. Normal admission CTG. Transferred to OU 10 hours later at 7 cm cervical dilatation because of slow progress of labour<br><u>In OU</u> : shared care (OU midwife and obstetrician). Augmentation of labour, CTG, spontaneous vaginal birth 3 hours after transfer                                                                                                                                                                                                                                                                                                                                  | OU  | <b>11</b><br><b>***</b>  | No ventilation<br>Admitted to NICU shortly after birth for respiratory problems. CPAP<br>Discharged well                                                                                                                                                                                                 |
| Case 8                | 10/5       | <b>Adverse event with potential adverse outcome</b><br>Multipara: Umbilical cord prolapse in multipara after spontaneous rupture of membranes. Local gynaecologist is summoned against protocol and an emergency caesarean section performed.<br>Had guidelines been followed, the woman would have had a tocolytic, pelvic elevation, and the infant would have been pushed up vaginally while an emergency transfer was carried out (minimum duration 20 min.). The women would have been taken directly to the operating theatre where an obstetrician would decide on the further action.<br><b>(case included in sensitivity analysis)</b> | FMU | <b>0</b>                 | The event happened less than two months after the maternity unit had been turned into a FMU.<br>The staff involved had previously worked closely together and chose not to follow the regional guidelines for emergency transfer from FMUs.<br>Apgar score 10/1, 10/5. Infant and mother discharged well |
| <b>Obstetric Unit</b> |            |                                                                                                                                                                                                                                                                                                                                                                                                                                                                                                                                                                                                                                                 |     |                          |                                                                                                                                                                                                                                                                                                          |
| Case 9                | <b>4/5</b> | Multipara<br>OU at 10 cm cervical dilatation, fast labour. No CTG. Meconium-stained amniotic fluid just before spontaneous vaginal birth                                                                                                                                                                                                                                                                                                                                                                                                                                                                                                        | OU  | 0.4                      | Ventilation, chest compression. Admitted to NICU for 9 hours, CPAP<br>Discharged well                                                                                                                                                                                                                    |
| Case 10               | <b>6/5</b> | <b>The only case of severe maternal morbidity in the study (The incident also lead to neonatal morbidity).</b><br>Multipara<br>OU at 5 cm cervical dilatation. Epidural, augmentation of labour, continuous CTG. Meconium-stained amniotic fluid, fetal distress leading to caesarean section.<br><b>Uterine rupture</b> discovered. Postpartum haemorrhage>2500 ml. <b>Peripartum hysterectomy.</b>                                                                                                                                                                                                                                            | OU  | 5                        | Oxygen mask, no ventilation<br><br>Admitted to NICU shortly after birth, hypertonia and respiratory problems. CPAP<br>Discharged well                                                                                                                                                                    |
| Case 11               | <b>6/5</b> | Primipara<br>OU at 5 cm dilatation. No dilatation for two hours: Augmentation of labour, CTG, meconium-stained fluid. Spinal analgesia (saddle block), followed by short fetal bradycardia. Ventouse delivery 7.5 hours after admission                                                                                                                                                                                                                                                                                                                                                                                                         | OU  | 4.6                      | No ventilation<br>Admitted to NICU shortly after birth for respiratory problems. CPAP, antibiotics<br>Discharged well                                                                                                                                                                                    |
| Case 12               | <b>6/5</b> | Multipara                                                                                                                                                                                                                                                                                                                                                                                                                                                                                                                                                                                                                                       | OU  | 3.7                      | No ventilation                                                                                                                                                                                                                                                                                           |

|         |            |                                                                                                                                |    |     |                                                                                                               |
|---------|------------|--------------------------------------------------------------------------------------------------------------------------------|----|-----|---------------------------------------------------------------------------------------------------------------|
|         |            | OU at 5 cm cervical dilation.<br>Augmentation of labour, meconium-stained labour,<br>continuous CTG, spontaneous vaginal birth |    |     | Admitted to NICU, hypertonia<br>and respiratory problems.<br>CPAP, treatment for seizures.<br>Discharged well |
| Case 13 | <b>6/5</b> | Multipara<br>OU at 10 cm cervical dilation. No CTG, fast labour, clear<br>amniotic fluid, spontaneous vaginal birth            | OU | 1.5 | No ventilation<br>Admitted to NICU for<br>respiratory problems CPAP.<br>Discharged well                       |

\*Longest NICU stay in study    \*\*Second longest NICU stay    \*\*\*Third longest NICU stay

For peer review only

STROBE 2007 (v4) Statement—Checklist of items that should be included in reports of *cohort studies*

| Section/Topic                | Item # | Recommendation                                                                                                                                                                       | Reported on page #                             |
|------------------------------|--------|--------------------------------------------------------------------------------------------------------------------------------------------------------------------------------------|------------------------------------------------|
| Title and abstract           | 1      | (a) Indicate the study's design with a commonly used term in the title or the abstract                                                                                               | 2 + 4                                          |
|                              |        | (b) Provide in the abstract an informative and balanced summary of what was done and what was found                                                                                  | 3                                              |
| <b>Introduction</b>          |        |                                                                                                                                                                                      |                                                |
| Background/rationale         | 2      | Explain the scientific background and rationale for the investigation being reported                                                                                                 | 4 + 5                                          |
| Objectives                   | 3      | State specific objectives, including any prespecified hypotheses                                                                                                                     | 5 + (6)                                        |
| <b>Methods</b>               |        |                                                                                                                                                                                      |                                                |
| Study design                 | 4      | Present key elements of study design early in the paper                                                                                                                              | 6                                              |
| Setting                      | 5      | Describe the setting, locations, and relevant dates, including periods of recruitment, exposure, follow-up, and data collection                                                      | 6-8 + supplementary information in table A + B |
| Participants                 | 6      | (a) Give the eligibility criteria, and the sources and methods of selection of participants. Describe methods of follow-up                                                           | 8-9                                            |
|                              |        | (b) For matched studies, give matching criteria and number of exposed and unexposed                                                                                                  | 8-9 + table 1                                  |
| Variables                    | 7      | Clearly define all outcomes, exposures, predictors, potential confounders, and effect modifiers. Give diagnostic criteria, if applicable                                             | 10                                             |
| Data sources/<br>measurement | 8*     | For each variable of interest, give sources of data and details of methods of assessment (measurement). Describe comparability of assessment methods if there is more than one group | 10                                             |
| Bias                         | 9      | Describe any efforts to address potential sources of bias                                                                                                                            | 14-15                                          |
| Study size                   | 10     | Explain how the study size was arrived at                                                                                                                                            | 10-11                                          |
| Quantitative variables       | 11     | Explain how quantitative variables were handled in the analyses. If applicable, describe which groupings were chosen and why                                                         | 10                                             |
| Statistical methods          | 12     | (a) Describe all statistical methods, including those used to control for confounding                                                                                                | 11-12                                          |
|                              |        | (b) Describe any methods used to examine subgroups and interactions                                                                                                                  | 12                                             |
|                              |        | (c) Explain how missing data were addressed                                                                                                                                          |                                                |
|                              |        | (d) If applicable, explain how loss to follow-up was addressed                                                                                                                       | No loss                                        |
|                              |        | (e) Describe any sensitivity analyses                                                                                                                                                |                                                |

|                          |     |                                                                                                                                                                                                              |                                                      |
|--------------------------|-----|--------------------------------------------------------------------------------------------------------------------------------------------------------------------------------------------------------------|------------------------------------------------------|
| <b>Results</b>           |     |                                                                                                                                                                                                              |                                                      |
| Participants             | 13* | (a) Report numbers of individuals at each stage of study—eg numbers potentially eligible, examined for eligibility, confirmed eligible, included in the study, completing follow-up, and analysed            | 12                                                   |
|                          |     | (b) Give reasons for non-participation at each stage                                                                                                                                                         |                                                      |
|                          |     | (c) Consider use of a flow diagram                                                                                                                                                                           | Figure 1                                             |
| Descriptive data         | 14* | (a) Give characteristics of study participants (eg demographic, clinical, social) and information on exposures and potential confounders                                                                     | 12-13 + table 1                                      |
|                          |     | (b) Indicate number of participants with missing data for each variable of interest                                                                                                                          | Table 2 +3                                           |
|                          |     | (c) Summarise follow-up time (eg, average and total amount)                                                                                                                                                  |                                                      |
| Outcome data             | 15* | Report numbers of outcome events or summary measures over time                                                                                                                                               |                                                      |
| Main results             | 16  | (a) Give unadjusted estimates and, if applicable, confounder-adjusted estimates and their precision (eg, 95% confidence interval). Make clear which confounders were adjusted for and why they were included | 13-14 + table 2+3                                    |
|                          |     | (b) Report category boundaries when continuous variables were categorized                                                                                                                                    | 14                                                   |
|                          |     | (c) If relevant, consider translating estimates of relative risk into absolute risk for a meaningful time period                                                                                             |                                                      |
| Other analyses           | 17  | Report other analyses done—eg analyses of subgroups and interactions, and sensitivity analyses                                                                                                               | 14-15 + table 4 + supplementary information, table C |
| <b>Discussion</b>        |     |                                                                                                                                                                                                              |                                                      |
| Key results              | 18  | Summarise key results with reference to study objectives                                                                                                                                                     | 16                                                   |
| <b>Limitations</b>       |     |                                                                                                                                                                                                              |                                                      |
| Interpretation           | 20  | Give a cautious overall interpretation of results considering objectives, limitations, multiplicity of analyses, results from similar studies, and other relevant evidence                                   | 16-19                                                |
| Generalisability         | 21  | Discuss the generalisability (external validity) of the study results                                                                                                                                        | 19-20                                                |
| <b>Other information</b> |     |                                                                                                                                                                                                              |                                                      |
| Funding                  | 22  | Give the source of funding and the role of the funders for the present study and, if applicable, for the original study on which the present article is based                                                | 23                                                   |

\*Give information separately for cases and controls in case-control studies and, if applicable, for exposed and unexposed groups in cohort and cross-sectional studies.

1  
2 **Note:** An Explanation and Elaboration article discusses each checklist item and gives methodological background and published examples of transparent reporting. The STROBE  
3 checklist is best used in conjunction with this article (freely available on the Web sites of PLoS Medicine at <http://www.plosmedicine.org/>, Annals of Internal Medicine at  
4 <http://www.annals.org/>, and Epidemiology at <http://www.epidem.com/>). Information on the STROBE Initiative is available at [www.strobe-statement.org](http://www.strobe-statement.org).  
5  
6  
7  
8  
9  
10  
11  
12  
13  
14  
15  
16  
17  
18  
19  
20  
21  
22  
23  
24  
25  
26  
27  
28  
29  
30  
31  
32  
33  
34  
35  
36  
37  
38  
39  
40  
41  
42  
43  
44  
45  
46  
47

For peer review only

1  
2  
3  
4  
5  
6  
7  
8  
9  
10  
11  
12  
13  
14  
15  
16  
17  
18  
19  
20  
21  
22  
23  
24  
25  
26  
27  
28  
29  
30  
31  
32  
33  
34  
35  
36  
37  
38  
39  
40  
41  
42  
43  
44  
45  
46  
47  
48  
49  
50  
51  
52  
53  
54  
55  
56  
57  
58  
59  
60

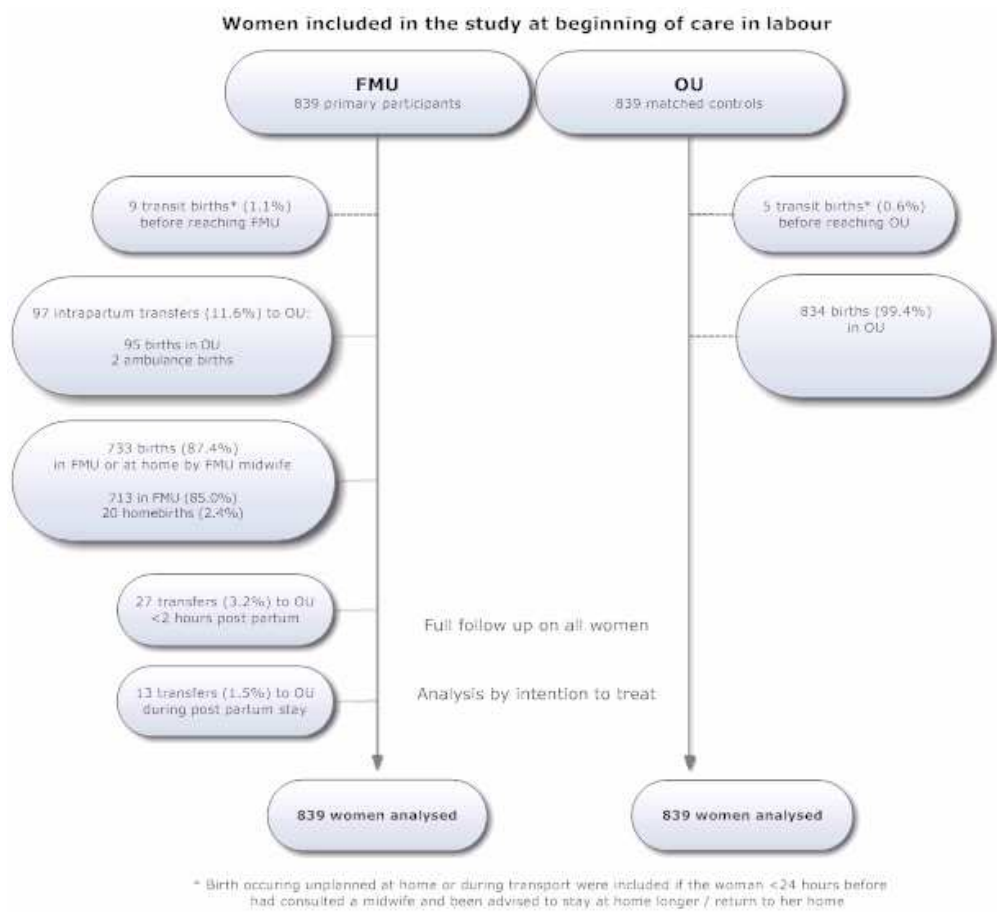

51x46mm (300 x 300 DPI)

only
